# Supplementary material for: Unified single-cell analysis of testis gene regulation and pathology in five mouse strains
Source: eLife journal article supplement (doi:10.7554/elife.43966), 2019-06-25
Supplement: supp [file elife-43966-supp-v1.zip]

Archive with 26 entries (26 files):
- elife_poa_e43966_Figure_3_figure_supplement_3.pdf
- elife_poa_e43966_Figure_6_figure_supplement_1.pdf
- elife_poa_e43966_Figure_7_figure_supplement_2.pdf
- elife_poa_e43966_Figure_3_figure_supplement_5.pdf
- elife_poa_e43966_Supplementary_file_2.xlsx
- elife_poa_e43966_Figure_1_figure_supplement_3.pdf
- elife_poa_e43966_Figure_4_figure_supplement_3.pdf
- elife_poa_e43966_Figure_3_figure_supplement_1.pdf
- elife_poa_e43966_Supplementary_file_4.zip
- elife_poa_e43966_Figure_3_figure_supplement_2.pdf
- elife_poa_e43966_Figure_4_figure_supplement_4.pdf
- elife_poa_e43966_Figure_3_figure_supplement_4.pdf
- elife_poa_e43966_Figure_4_figure_supplement_1.pdf
- elife_poa_e43966_Supplementary_file_1.xlsx
- elife_poa_e43966_Figure_1_figure_supplement_4.pdf
- elife_poa_e43966_Transparent_Reporting_File.pdf
- elife_poa_e43966_Supplementary_file_5.zip
- elife_poa_e43966_Figure_5_figure_supplement_1.pdf
- elife_poa_e43966_Figure_7_figure_supplement_1.pdf
- elife_poa_e43966_Figure_1_figure_supplement_5.pdf
- elife_poa_e43966_Supplementary_file_6.docx
- elife_poa_e43966_Figure_1_figure_supplement_2.pdf
- elife_poa_e43966_Figure_4_figure_supplement_2.pdf
- elife_poa_e43966_Figure_1_figure_supplement_1.jpg
- elife_poa_e43966_Supplementary_file_3.docx
- elife_poa_e43966_Supplementary_file_7.xlsx
