# Supplementary material for: Unified single-cell analysis of testis gene regulation and pathology in five mouse strains
Source: eLife journal article supplement (doi:10.7554/elife.43966), 2019-06-25
Supplement: supp [file elife-43966-supp-v1.zip › elife_poa_e43966_Figure_1_figure_supplement_4.pdf]

A

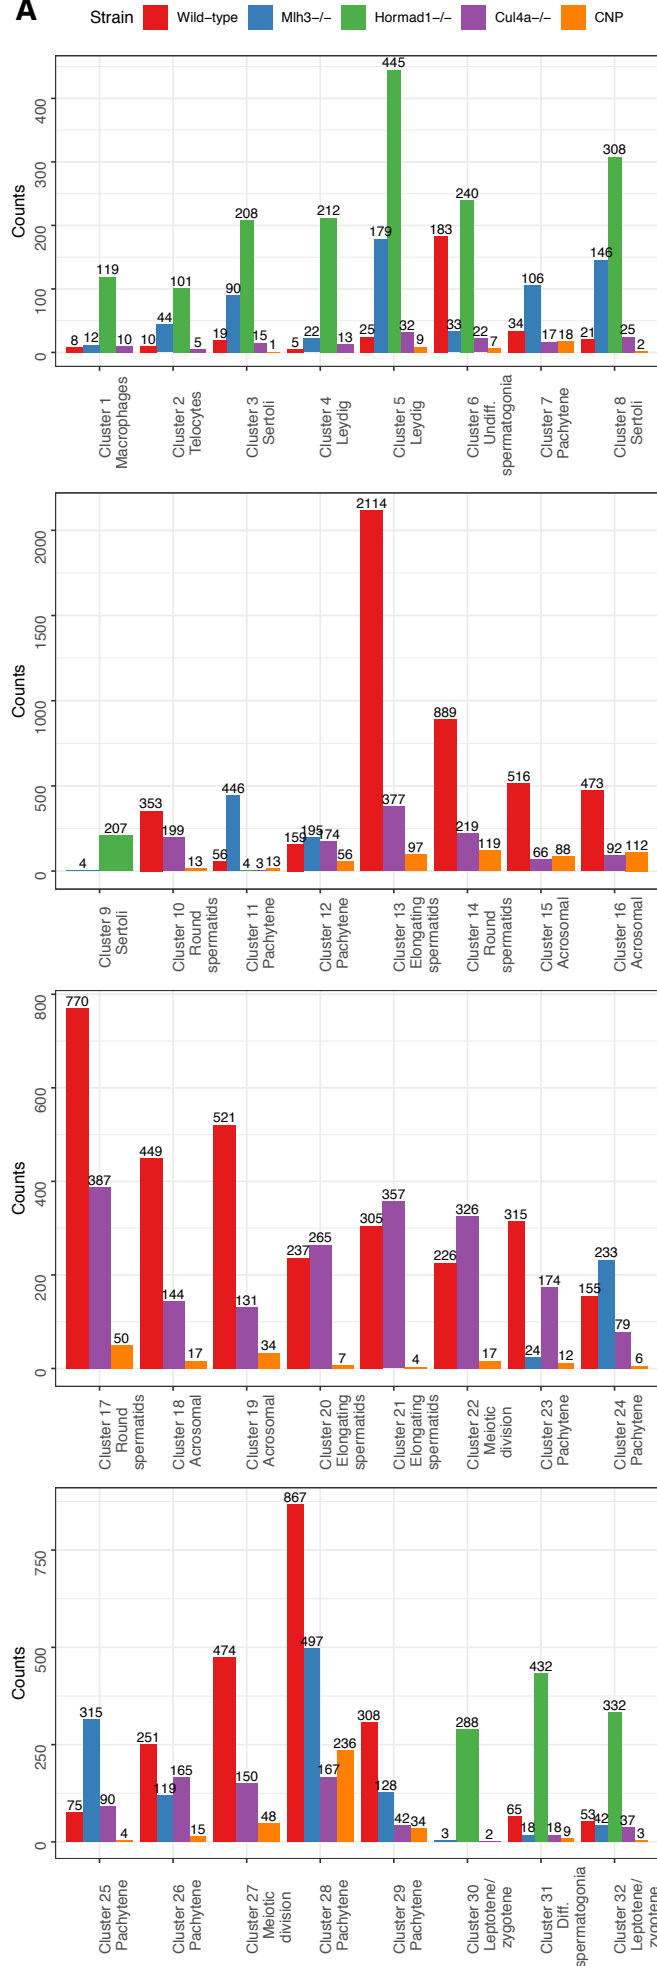

B

|            | Down-regulated | Not Significant | Up-regulated |
|------------|----------------|-----------------|--------------|
| Cluster 1  | 0              | 6584            | 0            |
| Cluster 2  | 0              | 5253            | 0            |
| Cluster 3  | 0              | 10114           | 1            |
| Cluster 4  | 210            | 10461           | 23           |
| Cluster 5  | 2              | 10408           | 9            |
| Cluster 6  | 223            | 12127           | 166          |
| Cluster 7  | 2              | 6916            | 0            |
| Cluster 8  | 6              | 9817            | 13           |
| Cluster 10 | 161            | 11259           | 35           |
| Cluster 11 | 5              | 6733            | 3            |
| Cluster 12 | 3              | 8966            | 0            |
| Cluster 13 | 104            | 10906           | 4            |
| Cluster 14 | 25             | 9082            | 13           |
| Cluster 15 | 1              | 7442            | 1            |
| Cluster 16 | 1              | 7121            | 1            |
| Cluster 17 | 266            | 13259           | 22           |
| Cluster 18 | 167            | 11123           | 22           |
| Cluster 19 | 72             | 11218           | 7            |
| Cluster 20 | 53             | 7686            | 17           |
| Cluster 21 | 81             | 10029           | 21           |
| Cluster 22 | 223            | 11965           | 21           |
| Cluster 23 | 58             | 10370           | 33           |
| Cluster 24 | 1260           | 11888           | 1            |
| Cluster 25 | 162            | 12223           | 24           |
| Cluster 26 | 120            | 11073           | 0            |
| Cluster 27 | 6              | 8904            | 200          |
| Cluster 28 | 44             | 10260           | 8            |
| Cluster 29 | 10             | 8170            | 4            |
| Cluster 31 | 103            | 10988           | 16           |
| Cluster 32 | 697            | 9560            | 281          |

\*Differential gene expression analysis between wild-type and mutants for clusters 9 & 30 not present here as no wild-type cells are found in these clusters.
