# Supplementary material for: Unified single-cell analysis of testis gene regulation and pathology in five mouse strains
Source: eLife journal article supplement (doi:10.7554/elife.43966), 2019-06-25

1  
2  
3  
4  
5  
6  
7  
8  
9  
10  
11  
12  
13  
14  
15  
16  
17  
18  
19  
20  
21  
22  
23  
24  
25  
26  
27  
28  
29  
30  
31  
32  
33  
34  
35  
36  
37  
38  
39  
40  
41  
42  
43  
44  
45

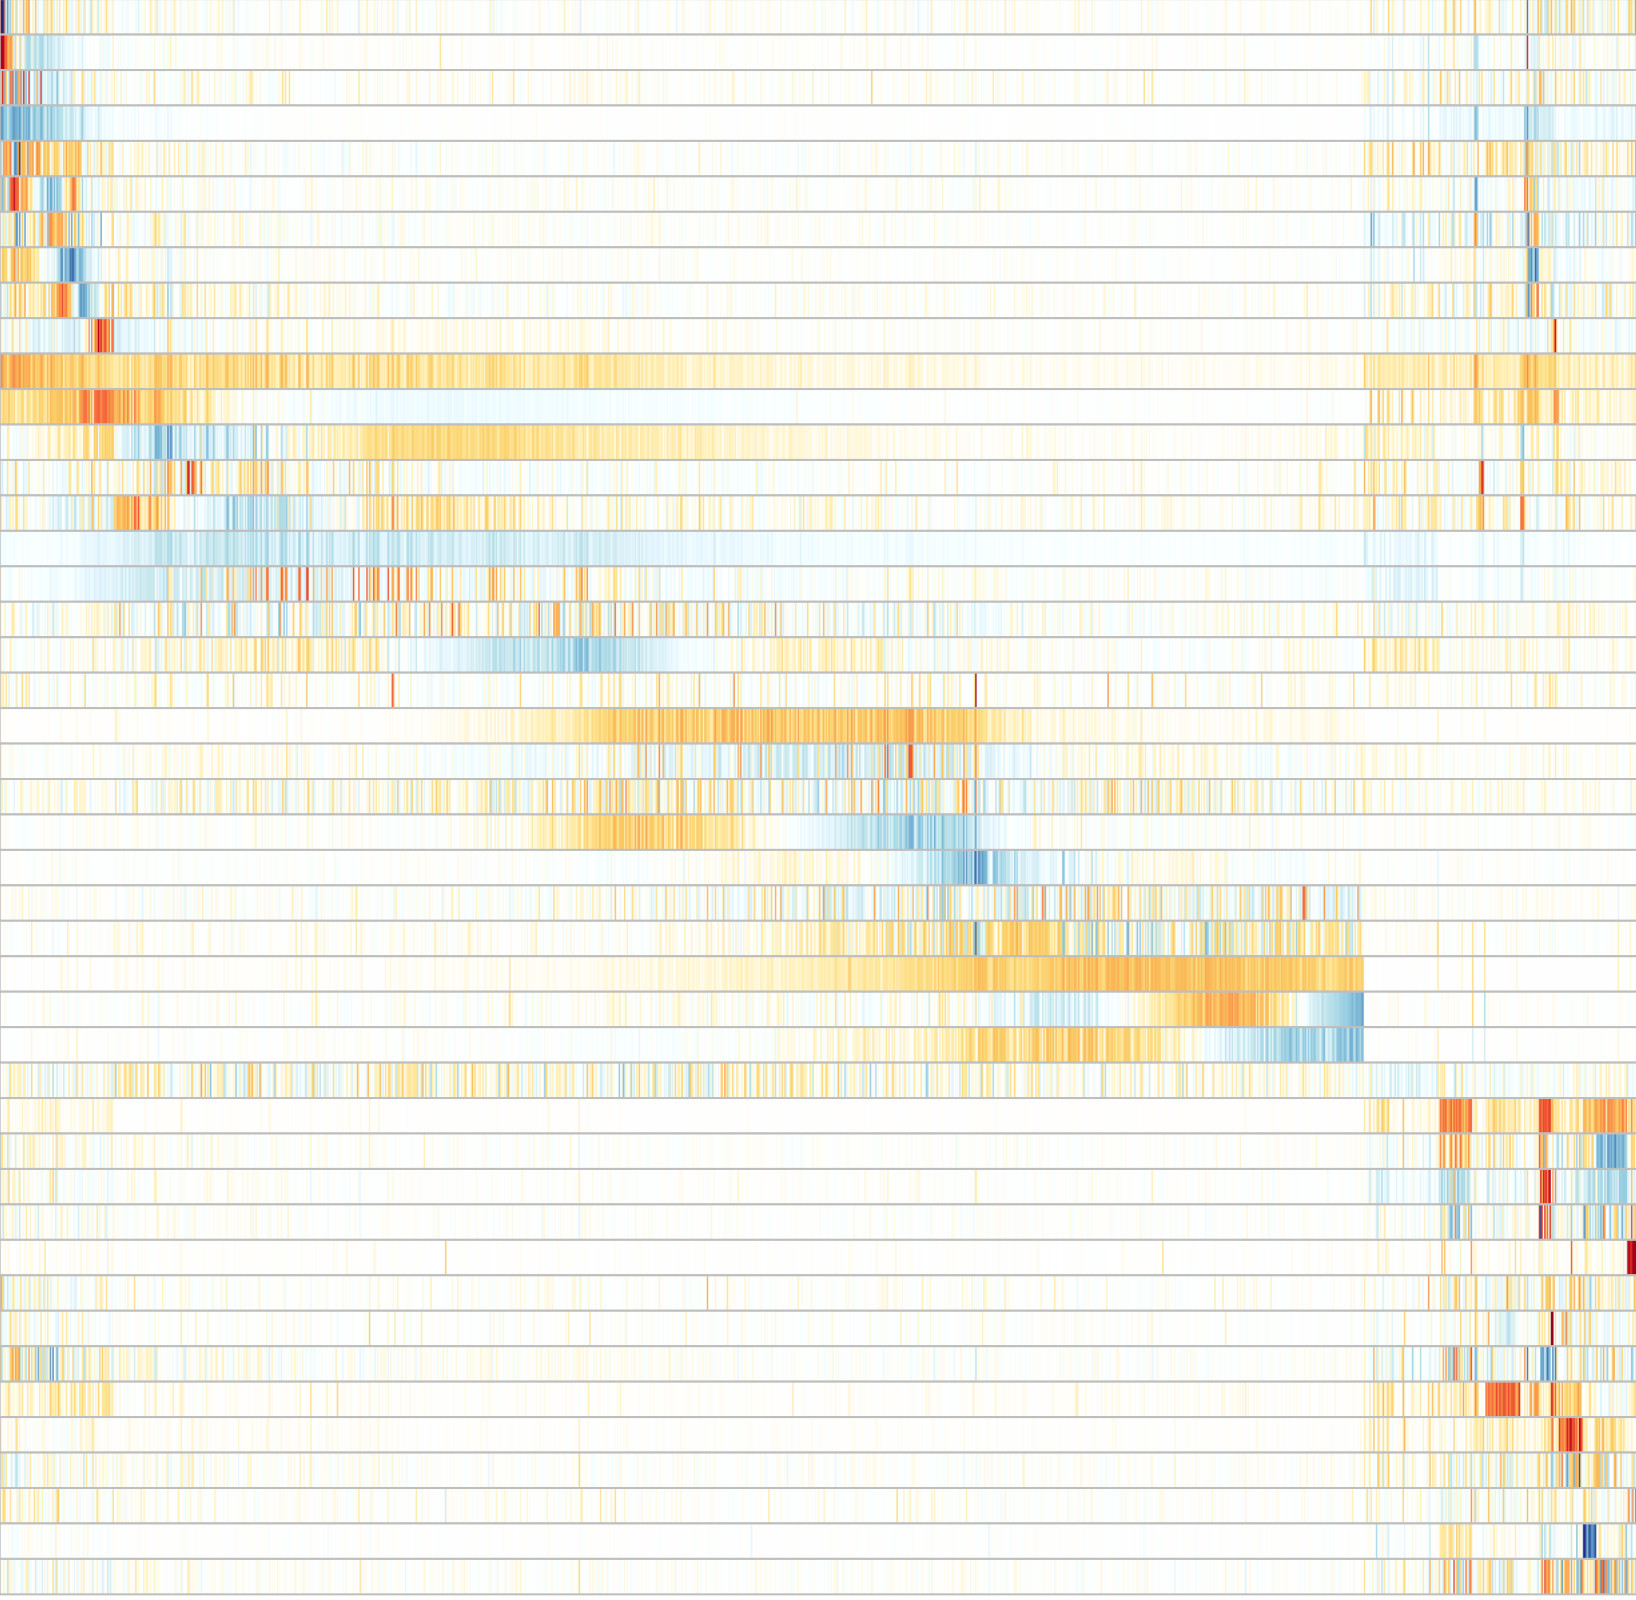

V50 Gfra1 vs Lin28a Stem Cells  
V31 Spermatogonial Stem Cells  
V29 Hormad1/SPG Batch  
V33 Spermatogonia (Broad)  
V7 Differentiating A1–4 Spermatogonia  
V2 B Spermatogonia  
V12 Hormad1 Batch  
V5 (pre)Leptotene  
V44 Zygotene  
V38 X activation (Hormad1)  
V27 Early General  
V23 Pre–Pachytene (& Hormad1)  
V13 Early Pachytene 1  
V48 Unknown Pachytene Subset  
V47 Early Pachytene 2  
V42 Pachytene  
V39 Late Pachytene  
V9 Respiration  
V20 Meiotic Divisions  
V6 Chemical Dissociation (WT)  
V30 Acrosomal  
V28 Acrosomal V2  
V25 Cul4a  
V35 Early vs Late Acrosomal  
V15 Round Spermatid  
V41 Batch (Late)  
V36 Spermiogenesis V2  
V17 Spermiogenesis  
V34 Late Spermiogenesis 2  
V18 Late Spermiogenesis 1  
V22 CNP / Batch  
V40 Leydig  
V26 Leydig (Fabp3 low)  
V24 Leydig (Gstm3 high)  
V19 Leydig (Kallikreins)  
V11 Macrophages  
V10 Muscle/Sertoli?  
V21 Peritubular Myoid Cells  
V43 Ribosomal  
V45 Sertoli (Aard High)  
V37 Sertoli (Trim7 High)  
V16 Sertoli (rare)  
V3 T Lymphocytes  
V32 Telocytes  
V49 Unknown Somatic

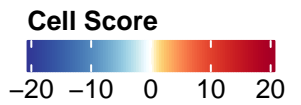

Supplement: supp [file elife-43966-supp-v1.zip › elife_poa_e43966_Figure_4_figure_supplement_1.pdf]
