# Supplementary material for: Unified single-cell analysis of testis gene regulation and pathology in five mouse strains
Source: eLife journal article supplement (doi:10.7554/elife.43966), 2019-06-25

**A** Enrichment of genes bounds by Stra8 in ChIPseq and upregulated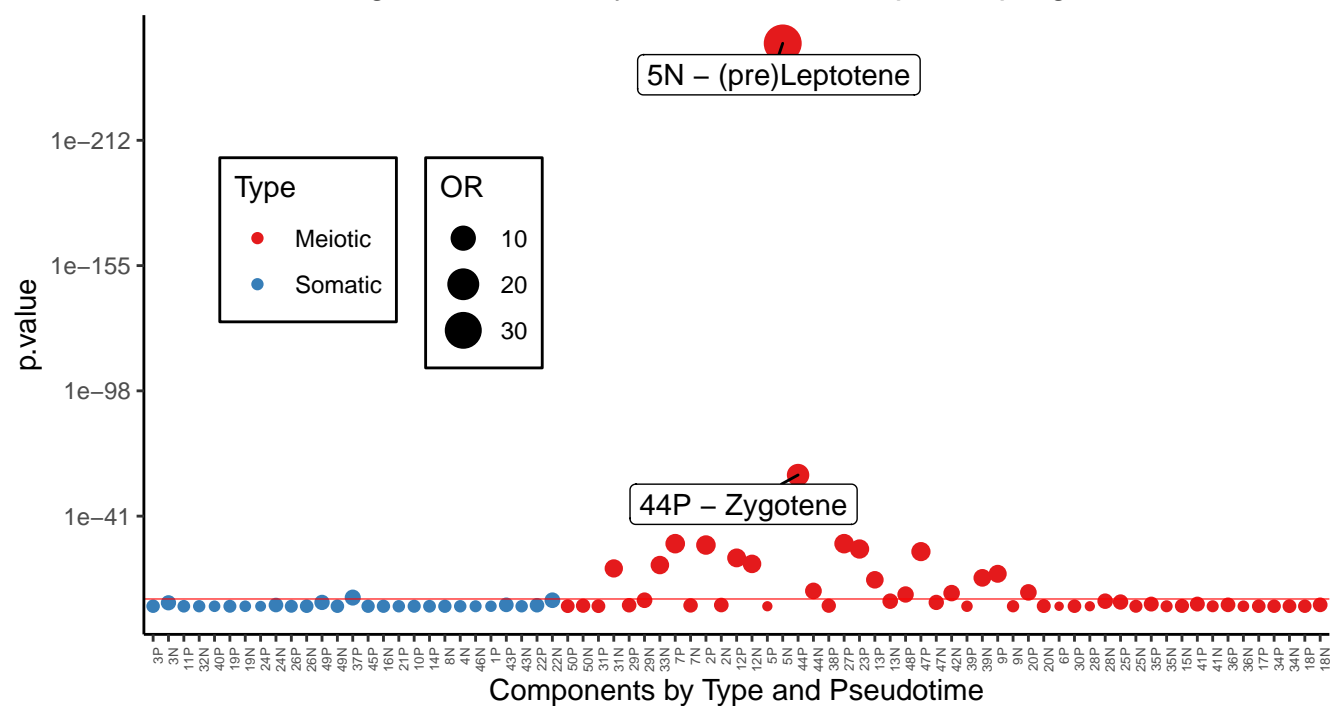**B** Enrichment of predicted direct targets of MYBL1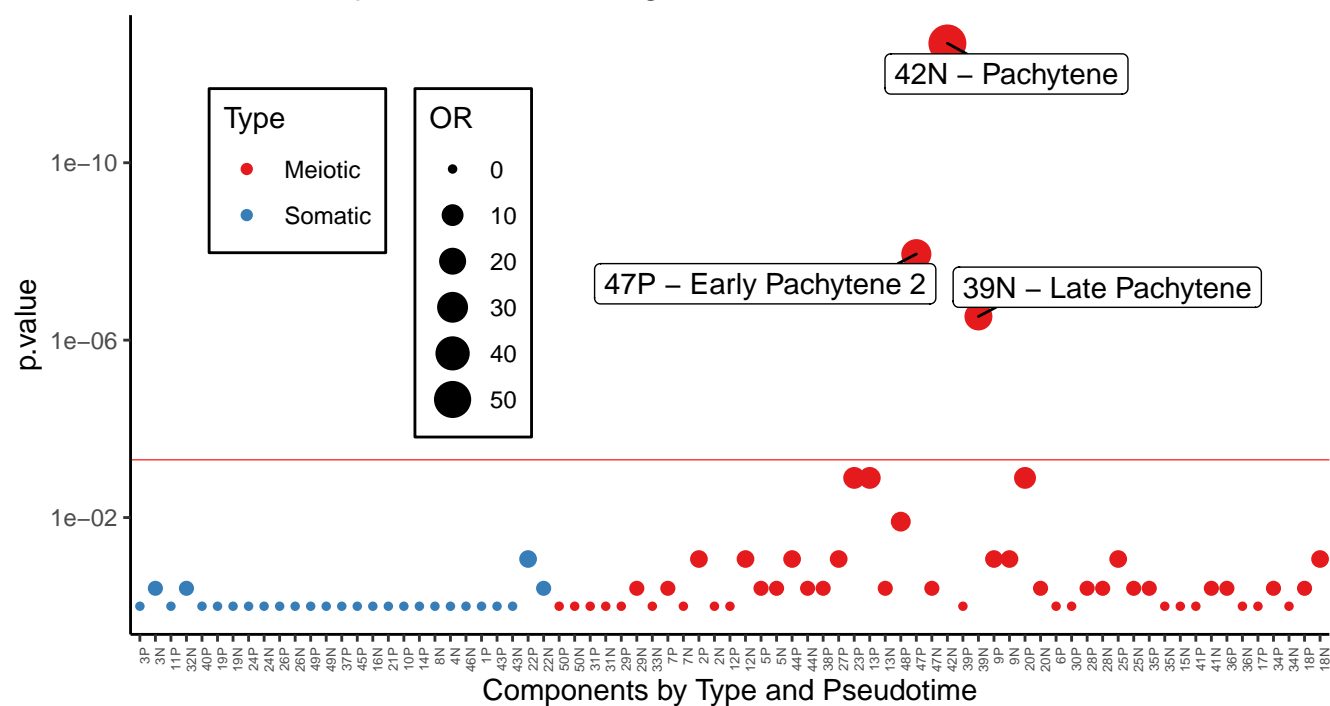**C** Enrichment of genes downregulated in Rfx2 KO & Bound by Rfx2 in ChIPseq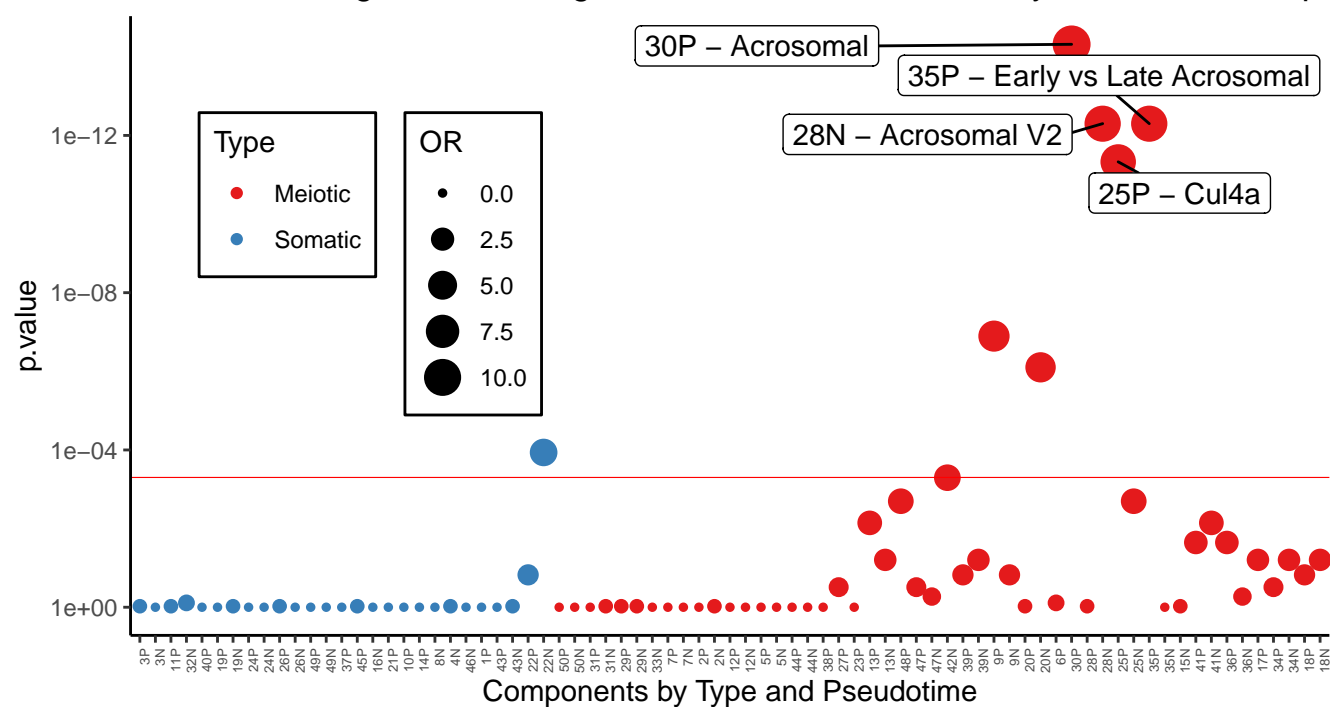**D** Enrichment of genes downregulated in Crem KO & Bound by Crem in ChIPseq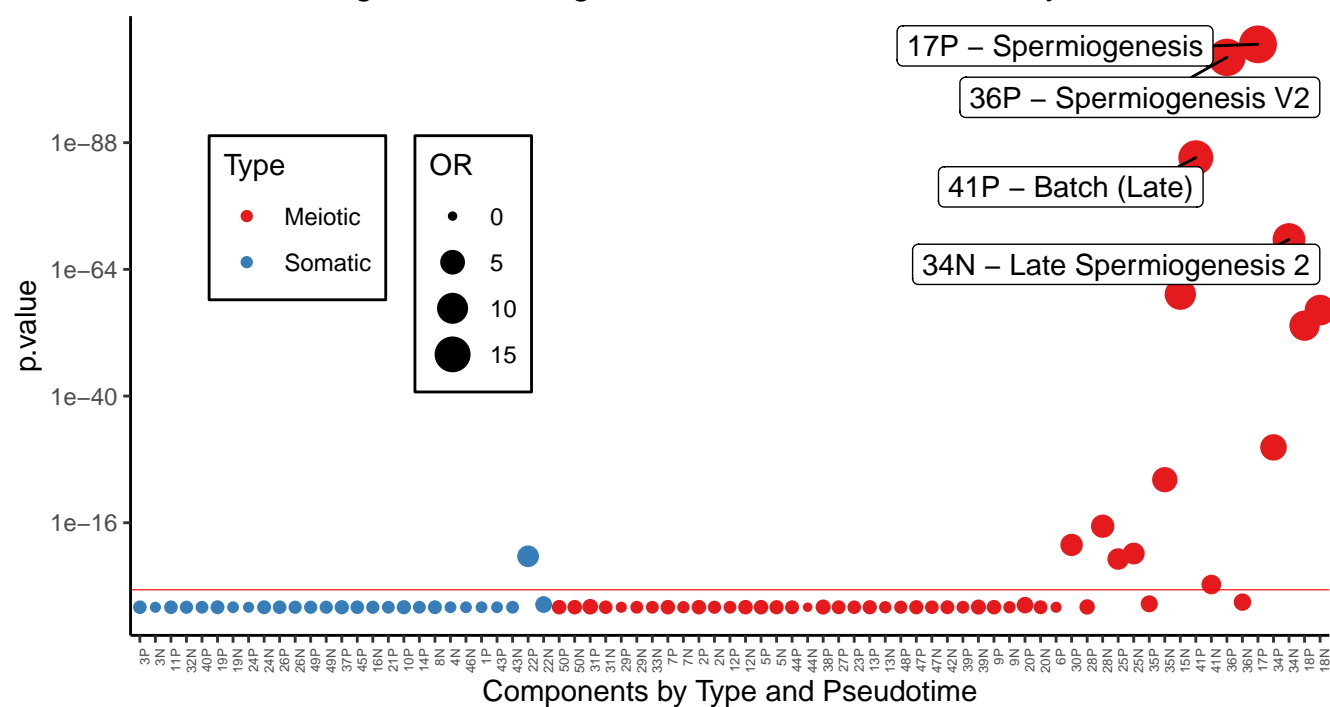

Supplement: supp [file elife-43966-supp-v1.zip › elife_poa_e43966_Figure_7_figure_supplement_2.pdf]
