# Supplementary material for: Unified single-cell analysis of testis gene regulation and pathology in five mouse strains
Source: eLife journal article supplement (doi:10.7554/elife.43966), 2019-06-25
Supplement: supp [file elife-43966-supp-v1.zip › elife_poa_e43966_Supplementary_file_1.xlsx]

## Sheet: Wild-type
New Name	Raw File Name	Method for single-cell suspension	Sequencing Platform	STAMPS	Age	Strain	Bead Lot	Mapped Reads
SPG	Pouf5	Enzymatic	Hiseq	300	7 days	C57BL/6J	91615	41388604
SPCI	FACS_SPCI	Mechanical	Miseq	200	2 months 21 days	C57BL/6J	91615	2118296
SPCII	FACS_SPCII	Mechanical	Miseq	400	2 months 21 days	C57BL/6J	91615	2055974
SPD	FACS_SPD	Mechanical	Miseq	300	2 months 21 days	C57BL/6J	91615	1978523
WT1	Mj2	Enzymatic	Miseq	200	3 months 21 days	C57BL/6J	91615	5065602
WT2	Mj3	Enzymatic	Hiseq	600	4 months 2 days	C57BL/6J	91615	75634489
WT3	MWT3330	Mechanical	Miseq	1500	4 months	C57BL/6J	91615	8816148
WT4	WT1108	Mechanical	Hiseq	3700	5 months 5 days	C57BL/6J	91615	44120247
WT5	WT1110	Mechanical	Hiseq	2700	5 months 7 days	C57BL/6J	91615	50515490
WT6	WT1111	Mechanical	Hiseq	3100	3 months 27 days	C57BL/6J	91615	53237395
WT7	WT1115	Mechanical	Hiseq	2800	4 months	C57BL/6J	91615	61540944
WT8	WT1116	Mechanical	Hiseq	2400	3 months 1 day	C57BL/6J	91615	65841512
WT9	WT1117	Mechanical	Hiseq	3400	3 months 2 days	C57BL/6J	91615	58792345
WT10	WT1121	Mechanical	Hiseq	2500	9 months 14 days	C57BL/6J	91615	45875980
WT11	WT1122	Mechanical	Hiseq	2100	7 months 21 days	C57BL/6J	91615	65055410
Mlh3_1	MLH3KO	Mechanical	Miseq	400	3 months 22 days	B6;129Mlh3-/-	91615	9788969
Mlh3_2	MLH3300	Mechanical	Miseq	300	8 months 30 days	B6;129Mlh3-/-	91615	19791310
Mlh3_3	MLH3800	Mechanical	HIseq	800	8 months 30 days	B6;129 Mlh3-/-	91615	52453807
Mlh3_4	MLH31190	Mechanical	Hiseq	1500	2 months 21 days	B6;129 Mlh3-/-	91615	30089366
Mlh3_5	MLH31191	Mechanical	Hiseq	4300	2 months 22 days	B6;129 Mlh3-/-	91615	23456887
Mlh3_6	MLH31192	Mechanical	Hiseq	3900	2 months 23 days	B6;129 Mlh3-/-	91615	38355599
Hormad1_1	Hormad1_4	Mechanical	Hiseq	2300	4 months	B6;129 Hormad1-/-	72817	43632006
Hormad1_2	Hormad1_5	Mechanical	Hiseq	7700	4 months 3 days	B6;129 Hormad1-/-	72817	143860532
CNP_1	CNP1215	Mechanical	Hiseq	3400	1 month 18 days	C57BL/6J CNP-EGFP BAC TRAP	91615	17649845
CNP_2	CNP0105	Mechanical	Hiseq	1000	1 month 21 days	C57BL/6J CNP-EGFP BAC TRAP	91615	13429718
Cul4a_1	Cul4a0328	Mechanical	Hiseq	2800	2 months 14 days	B6;129 Cul4a-/-	91615	181851615
Cul4a_2	Cul4a0330	Mechanical	Hiseq	3000	2 months 16 days	B6;129 Cul4a-/-	91615	161470679
Total				57600
