# Supplementary material for: Unified single-cell analysis of testis gene regulation and pathology in five mouse strains
Source: eLife journal article supplement (doi:10.7554/elife.43966), 2019-06-25
Supplement: supp [file elife-43966-supp-v1.zip › elife_poa_e43966_Supplementary_file_2.xlsx]

## Sheet: SuppTable2_ClusterMarkersJointA
gene	p_val	avg_logFC	pct.1	pct.2	p_val_adj	cluster	predicted_cell_type
Lyz2	0	7.45924	0.799	0.022	0	1	Macrophage
C1qc	0	6.9443	0.671	0.006	0	1	Macrophage
C1qa	0	6.75313	0.631	0.004	0	1	Macrophage
C1qb	0	6.62514	0.711	0.02	0	1	Macrophage
Pf4	0	6.6203	0.597	0.007	0	1	Macrophage
Trem2	0	6.56046	0.376	0.001	0	1	Macrophage
Wfdc17	0	6.45629	0.537	0.006	0	1	Macrophage
Ccl8	0	6.41369	0.497	0.007	0	1	Macrophage
F13a1	0	6.04942	0.544	0.013	0	1	Macrophage
Cyth4	0	5.95035	0.295	0.001	0	1	Macrophage
Ctss	0	5.92331	0.604	0.005	0	1	Macrophage
Csf1r	0	5.90753	0.537	0.005	0	1	Macrophage
Laptm5	0	5.85877	0.57	0.003	0	1	Macrophage
Ms4a7	0	5.75969	0.423	0.002	0	1	Macrophage
Cd74	0	5.75025	0.362	0.005	0	1	Macrophage
Evi2a	0	5.74075	0.275	0.001	0	1	Macrophage
Tyrobp	0	5.73516	0.544	0.005	0	1	Macrophage
Cd68	0	5.73305	0.329	0.002	0	1	Macrophage
Cbr2	0	5.67943	0.47	0.004	0	1	Macrophage
Stab1	0	5.6693	0.477	0.003	0	1	Macrophage
Alox5ap	0	5.66667	0.315	0.002	0	1	Macrophage
Clec4n	0	5.63861	0.315	0.001	0	1	Macrophage
Folr2	0	5.59236	0.289	0.002	0	1	Macrophage
Cybb	0	5.51522	0.262	0.001	0	1	Macrophage
Ms4a6c	0	5.4919	0.329	0.002	0	1	Macrophage
H2-Aa	0	5.46589	0.295	0.005	0	1	Macrophage
Mrc1	0	5.44665	0.577	0.016	0	1	Macrophage
Ly86	0	5.44024	0.309	0.001	0	1	Macrophage
Grn	0	5.43347	0.577	0.025	0	1	Macrophage
Dab2	0	5.36946	0.503	0.006	0	1	Macrophage
Fcer1g	0	5.34943	0.49	0.009	0	1	Macrophage
Pld4	0	5.34351	0.268	0.001	0	1	Macrophage
H2-D1	0	5.30813	0.799	0.06	0	1	Macrophage
Ighm	0	5.22686	0.262	0.002	0	1	Macrophage
Cx3cr1	0	5.16126	0.336	0.006	0	1	Macrophage
Cyba	0	5.13602	0.584	0.013	0	1	Macrophage
Ptpn18	0	5.11598	0.369	0.006	0	1	Macrophage
Maf	0	5.08961	0.577	0.018	0	1	Macrophage
Crip1	0	5.07082	0.409	0.013	0	1	Macrophage
H2-Eb1	0	5.03639	0.262	0.005	0	1	Macrophage
Ctsc	0	4.95121	0.389	0.006	0	1	Macrophage
Lcp1	0	4.8823	0.356	0.005	0	1	Macrophage
Hexb	0	4.78318	0.477	0.011	0	1	Macrophage
Mndal	0	4.74803	0.255	0.003	0	1	Macrophage
Hpgds	0	4.69796	0.275	0.003	0	1	Macrophage
Fcgr2b	0	4.68842	0.322	0.004	0	1	Macrophage
Dusp6	0	4.58993	0.282	0.005	0	1	Macrophage
Unc93b1	0	4.54367	0.309	0.007	0	1	Macrophage
Psmb8	0	4.54361	0.255	0.005	0	1	Macrophage
Trf	0	4.49557	0.376	0.009	0	1	Macrophage
Cfh	0	4.48454	0.282	0.004	0	1	Macrophage
Fos	0	4.47421	0.416	0.014	0	1	Macrophage
Pltp	0	4.25079	0.349	0.006	0	1	Macrophage
Igf1	8.66672e-308	3.83105	0.463	0.018	1.66938e-303	1	Macrophage
Rnase4	5.34683e-286	4.39992	0.47	0.021	1.02991e-281	1	Macrophage
Tgfbi	2.59272e-284	4.20895	0.383	0.013	4.9941e-280	1	Macrophage
Mafb	2.40262e-283	4.35448	0.403	0.015	4.62793e-279	1	Macrophage
Nrp1	2.61116e-280	4.17165	0.329	0.01	5.02962e-276	1	Macrophage
B2m	9.11836e-240	5.51599	0.832	0.091	1.75638e-235	1	Macrophage
Selenop	1.25249e-234	5.8253	0.765	0.076	2.41255e-230	1	Macrophage
Ly6e	1.24004e-221	3.76802	0.711	0.065	2.38856e-217	1	Macrophage
Arhgdib	1.48219e-219	3.82915	0.289	0.01	2.85499e-215	1	Macrophage
Cd52	1.12333e-214	4.19025	0.275	0.009	2.16376e-210	1	Macrophage
Lgmn	2.39792e-208	4.75495	0.51	0.035	4.61887e-204	1	Macrophage
Ctsb	4.21751e-208	5.21596	0.738	0.079	8.12378e-204	1	Macrophage
Ctsa	2.27314e-201	4.21429	0.383	0.02	4.37852e-197	1	Macrophage
Hpgd	1.01514e-194	4.32593	0.396	0.022	1.95537e-190	1	Macrophage
Zfp36	2.09424e-194	4.11595	0.289	0.011	4.03393e-190	1	Macrophage
Tmsb4x	6.9114e-189	5.73715	0.946	0.168	1.33127e-184	1	Macrophage
Mpeg1	1.6293e-187	4.02296	0.309	0.013	3.13836e-183	1	Macrophage
Zeb2	1.32618e-177	3.95512	0.436	0.029	2.55449e-173	1	Macrophage
Gbp7	3.77447e-177	4.03427	0.268	0.011	7.27039e-173	1	Macrophage
Sat1	2.86026e-175	3.78697	0.356	0.019	5.50943e-171	1	Macrophage
Ehd4	2.56919e-174	4.32933	0.383	0.023	4.94878e-170	1	Macrophage
Ftl1	2.41709e-169	4.99238	0.597	0.061	4.6558e-165	1	Macrophage
Junb	8.70771e-169	3.82155	0.349	0.019	1.67728e-164	1	Macrophage
Apoe	2.2203e-158	7.15437	0.839	0.149	4.27674e-154	1	Macrophage
Rps4x	1.97234e-148	3.56134	0.47	0.04	3.79912e-144	1	Macrophage
Mef2c	7.05348e-131	4.11864	0.356	0.026	1.35864e-126	1	Macrophage
Anxa5	1.42114e-127	3.71592	0.342	0.025	2.7374e-123	1	Macrophage
Blvrb	8.00844e-126	3.71106	0.349	0.026	1.54259e-121	1	Macrophage
Ctsz	2.49413e-125	4.0118	0.282	0.017	4.80419e-121	1	Macrophage
Klf6	2.03018e-122	3.60789	0.315	0.022	3.91053e-118	1	Macrophage
Psap	8.08985e-122	3.32139	0.564	0.074	1.55827e-117	1	Macrophage
Man2b1	4.75745e-119	3.65727	0.356	0.029	9.16379e-115	1	Macrophage
Cst3	8.13056e-116	2.96541	0.893	0.235	1.56611e-111	1	Macrophage
Gpx1	1.02883e-110	3.85307	0.517	0.066	1.98173e-106	1	Macrophage
Tmem176b	9.75779e-107	1.17858	0.483	0.056	1.87954e-102	1	Macrophage
H2-K1	4.15812e-105	3.24875	0.758	0.164	8.00936e-101	1	Macrophage
Emp3	9.64029e-105	3.21224	0.517	0.07	1.85691e-100	1	Macrophage
Ctsh	5.00822e-102	2.8425	0.342	0.031	9.64683e-98	1	Macrophage
Fcgr3	5.00058e-101	3.8925	0.309	0.026	9.63211e-97	1	Macrophage
Gas6	4.66995e-99	3.58928	0.349	0.033	8.99526e-95	1	Macrophage
Ninj1	1.08466e-98	3.96127	0.302	0.025	2.08928e-94	1	Macrophage
Mbnl1	3.79436e-98	2.94869	0.362	0.036	7.3087e-94	1	Macrophage
Ctsd	5.16645e-98	3.99116	0.477	0.063	9.95162e-94	1	Macrophage
H2-Ab1	1.8314e-92	5.13755	0.329	0.032	3.52764e-88	1	Macrophage
Ahnak	6.54243e-90	3.09356	0.262	0.02	1.2602e-85	1	Macrophage
Marcks	1.64996e-85	3.49486	0.396	0.049	3.17816e-81	1	Macrophage
Fth1	3.61038e-85	2.69281	0.893	0.333	6.95432e-81	1	Macrophage
Arhgap30	5.72003e-84	3.53312	0.295	0.028	1.10179e-79	1	Macrophage
Jun	1.05775e-83	3.87473	0.349	0.039	2.03743e-79	1	Macrophage
S100a10	1.12023e-83	3.423	0.302	0.029	2.15778e-79	1	Macrophage
Neat1	2.66389e-82	2.72299	0.456	0.068	5.13118e-78	1	Macrophage
Rpl10	1.41358e-81	2.63962	0.477	0.074	2.72283e-77	1	Macrophage
Arpc1b	5.20537e-80	2.72056	0.463	0.071	1.00266e-75	1	Macrophage
Atp2b1	2.79005e-79	3.51708	0.477	0.077	5.3742e-75	1	Macrophage
Tmem176a	1.53154e-76	0.541255	0.436	0.062	2.95006e-72	1	Macrophage
Rgs2	6.2701e-74	3.58013	0.342	0.042	1.20775e-69	1	Macrophage
Actb	2.61143e-72	2.94529	0.953	0.605	5.03014e-68	1	Macrophage
Cotl1	3.53304e-69	3.6518	0.255	0.025	6.80535e-65	1	Macrophage
Rpl36a	2.32946e-68	2.61211	0.403	0.061	4.487e-64	1	Macrophage
Insl3	4.95025e-65	0.512273	0.664	0.158	9.53518e-61	1	Macrophage
Nfkbia	5.06228e-65	2.88051	0.309	0.038	9.75097e-61	1	Macrophage
Serinc3	5.03567e-64	2.23085	0.691	0.205	9.69971e-60	1	Macrophage
Snx2	7.94019e-64	3.35929	0.329	0.045	1.52944e-59	1	Macrophage
Clic1	1.119e-63	2.56952	0.295	0.036	2.15541e-59	1	Macrophage
Txnip	2.04814e-63	2.81147	0.342	0.048	3.94513e-59	1	Macrophage
Clta	3.24675e-63	3.43603	0.463	0.089	6.25388e-59	1	Macrophage
Sh3bgrl3	2.7208e-62	3.68586	0.523	0.117	5.2408e-58	1	Macrophage
Tmem50a	1.03416e-61	2.625	0.423	0.074	1.992e-57	1	Macrophage
Itm2b	2.38175e-61	3.39361	0.805	0.366	4.58773e-57	1	Macrophage
Klf2	2.9307e-61	3.28921	0.349	0.052	5.64511e-57	1	Macrophage
Samhd1	1.68978e-60	3.47049	0.255	0.028	3.25485e-56	1	Macrophage
Zfp36l1	2.28088e-59	2.84453	0.295	0.038	4.39344e-55	1	Macrophage
Ostf1	5.14693e-59	3.55814	0.255	0.029	9.91401e-55	1	Macrophage
Cd47	1.25488e-57	1.73759	0.396	0.068	2.41714e-53	1	Macrophage
Ptms	1.00666e-56	2.99159	0.295	0.04	1.93903e-52	1	Macrophage
Abca1	5.91098e-56	2.29372	0.295	0.039	1.13857e-51	1	Macrophage
Tpm3	1.28422e-54	1.64574	0.53	0.132	2.47367e-50	1	Macrophage
Timp2	2.74955e-54	1.68226	0.544	0.137	5.29618e-50	1	Macrophage
Cd302	1.39829e-53	2.48163	0.342	0.054	2.69338e-49	1	Macrophage
Snx5	1.31003e-51	3.40975	0.349	0.06	2.52338e-47	1	Macrophage
Vim	6.41604e-50	2.21789	0.356	0.062	1.23586e-45	1	Macrophage
Creg1	6.54257e-50	1.87112	0.43	0.09	1.26023e-45	1	Macrophage
Myo5a	1.93474e-49	3.61542	0.275	0.04	3.7267e-45	1	Macrophage
Gnai2	2.34966e-47	3.01306	0.396	0.082	4.52591e-43	1	Macrophage
Rpl39	1.20361e-44	2.06142	0.302	0.05	2.31839e-40	1	Macrophage
Rps3a3	8.53417e-44	2.18465	0.342	0.065	1.64385e-39	1	Macrophage
Atrx	7.66742e-43	3.14432	0.383	0.081	1.4769e-38	1	Macrophage
Cd63	4.61231e-42	2.36024	0.477	0.132	8.88423e-38	1	Macrophage
Anp32a	1.42394e-41	3.56059	0.315	0.058	2.74279e-37	1	Macrophage
Slc6a6	1.28608e-40	3.879	0.315	0.061	2.47724e-36	1	Macrophage
Actr3	1.19533e-39	2.43261	0.268	0.045	2.30244e-35	1	Macrophage
Ptma	4.599e-39	1.60247	0.477	0.128	8.85859e-35	1	Macrophage
mt-Rnr2	1.69912e-38	0.835883	1	0.92	3.27284e-34	1	Macrophage
Arpc3	4.59836e-38	2.31252	0.262	0.044	8.85737e-34	1	Macrophage
Mef2a	9.17839e-37	3.49875	0.376	0.092	1.76794e-32	1	Macrophage
Myl6	8.03793e-36	2.3926	0.383	0.096	1.54827e-31	1	Macrophage
Cltc	1.18112e-35	3.0908	0.362	0.087	2.27507e-31	1	Macrophage
Npc2	3.67703e-35	1.52405	0.503	0.165	7.08269e-31	1	Macrophage
Mgst1	8.09699e-35	0.687904	0.383	0.089	1.55964e-30	1	Macrophage
Akr1a1	1.06956e-34	1.57838	0.45	0.133	2.06019e-30	1	Macrophage
Tubb5	2.1745e-34	2.29662	0.282	0.054	4.18851e-30	1	Macrophage
mt-Nd1	5.16217e-34	0.350923	0.846	0.467	9.94336e-30	1	Macrophage
Cox8a	2.3493e-33	0.910262	0.376	0.094	4.52523e-29	1	Macrophage
Itm2c	2.85006e-31	1.16521	0.289	0.061	5.48978e-27	1	Macrophage
Arpc5	1.09338e-30	1.51033	0.356	0.091	2.10607e-26	1	Macrophage
Dek	3.14177e-30	1.88551	0.47	0.155	6.05168e-26	1	Macrophage
Psme2	2.68374e-29	2.31789	0.262	0.054	5.16942e-25	1	Macrophage
Cstb	2.83594e-29	0.688818	0.322	0.078	5.46259e-25	1	Macrophage
Gm42418	1.44601e-28	2.7688	0.517	0.194	2.7853e-24	1	Macrophage
Itgb1	1.55634e-28	2.99828	0.309	0.074	2.99783e-24	1	Macrophage
Hspa8	2.94014e-28	1.43809	0.43	0.135	5.66331e-24	1	Macrophage
Txn1	5.70556e-28	1.04675	0.322	0.08	1.099e-23	1	Macrophage
Rap1b	1.53957e-27	2.65883	0.255	0.055	2.96552e-23	1	Macrophage
Akr1cl	2.49886e-27	0.405468	0.396	0.112	4.81331e-23	1	Macrophage
Cox6b1	3.02248e-27	1.01983	0.403	0.126	5.8219e-23	1	Macrophage
Ifi27	6.63747e-27	1.17108	0.255	0.055	1.27851e-22	1	Macrophage
Lgals1	1.71296e-26	2.94429	0.376	0.116	3.29949e-22	1	Macrophage
Aldh2	1.90986e-26	1.03252	0.309	0.077	3.67877e-22	1	Macrophage
Myl12a	2.33703e-26	1.86912	0.403	0.128	4.50159e-22	1	Macrophage
Hsp90ab1	2.4274e-26	0.677192	0.745	0.41	4.67567e-22	1	Macrophage
Rpl3	5.45794e-26	1.9738	0.557	0.253	1.05131e-21	1	Macrophage
Rplp1	6.07937e-26	1.5271	0.765	0.511	1.17101e-21	1	Macrophage
Fau	6.26439e-26	1.54428	0.685	0.384	1.20665e-21	1	Macrophage
Slc25a5	6.31904e-26	1.26296	0.315	0.083	1.21717e-21	1	Macrophage
Snx6	6.72938e-26	1.59005	0.342	0.097	1.29621e-21	1	Macrophage
Cdc42	6.73586e-26	1.59245	0.43	0.145	1.29746e-21	1	Macrophage
Fkbp2	1.55069e-25	0.989729	0.362	0.109	2.98693e-21	1	Macrophage
Rpl14	2.00637e-25	1.13299	0.597	0.272	3.86467e-21	1	Macrophage
mt-Cytb	2.86296e-25	0.292791	0.805	0.434	5.51464e-21	1	Macrophage
Rock2	3.39725e-25	1.07907	0.349	0.099	6.54378e-21	1	Macrophage
Ncl	7.05781e-25	0.457123	0.584	0.228	1.35948e-20	1	Macrophage
Ndufb11	7.96305e-25	2.40502	0.275	0.067	1.53384e-20	1	Macrophage
Rps8	1.36642e-24	1.25362	0.611	0.317	2.632e-20	1	Macrophage
Kif5b	1.81086e-24	1.25923	0.376	0.117	3.48807e-20	1	Macrophage
Rps19	3.28192e-24	1.37664	0.591	0.3	6.32164e-20	1	Macrophage
Cfl1	4.01042e-24	1.92392	0.356	0.112	7.72487e-20	1	Macrophage
Psma7	1.28489e-23	0.75487	0.456	0.165	2.47495e-19	1	Macrophage
Rps3	7.40729e-23	1.58916	0.584	0.294	1.42679e-18	1	Macrophage
Ppib	3.09052e-22	1.26748	0.396	0.138	5.95295e-18	1	Macrophage
Jak1	2.68578e-21	1.22526	0.275	0.074	5.17336e-17	1	Macrophage
Rpl19	3.11158e-21	1.0346	0.517	0.24	5.99352e-17	1	Macrophage
Rps27a	3.21158e-21	1.20164	0.57	0.29	6.18614e-17	1	Macrophage
mt-Rnr1	6.97922e-21	1.12804	0.577	0.269	1.34434e-16	1	Macrophage
Tcf4	8.24677e-21	2.35883	0.309	0.095	1.58849e-16	1	Macrophage
Rplp2	1.13527e-20	1.34907	0.644	0.378	2.18677e-16	1	Macrophage
Pfn1	1.53371e-20	3.67019	0.342	0.118	2.95423e-16	1	Macrophage
Ssr4	3.07603e-20	1.64277	0.275	0.076	5.92506e-16	1	Macrophage
M6pr	3.87625e-20	1.40907	0.275	0.078	7.46643e-16	1	Macrophage
Vcam1	6.88894e-20	0.363251	0.282	0.078	1.32695e-15	1	Macrophage
Rps11	8.08287e-20	1.09753	0.604	0.333	1.55692e-15	1	Macrophage
Rac1	2.46088e-19	2.33934	0.275	0.08	4.74015e-15	1	Macrophage
Gnas	3.52731e-19	0.611287	0.43	0.168	6.7943e-15	1	Macrophage
Zcchc6	3.61887e-19	1.69597	0.302	0.097	6.97067e-15	1	Macrophage
Wwp1	4.70592e-19	2.54031	0.289	0.089	9.06454e-15	1	Macrophage
Fabp3	4.70875e-19	0.728408	0.322	0.101	9.06999e-15	1	Macrophage
Slc25a4	5.39005e-19	0.292323	0.295	0.089	1.03823e-14	1	Macrophage
Rps23	8.2098e-19	1.36563	0.57	0.317	1.58137e-14	1	Macrophage
Rab14	2.12485e-18	1.4704	0.403	0.165	4.09289e-14	1	Macrophage
Atp6v0b	2.55565e-18	2.7244	0.329	0.111	4.92269e-14	1	Macrophage
Rps29	3.67518e-18	1.47617	0.564	0.313	7.07913e-14	1	Macrophage
Rpl23a	1.65054e-17	1.38598	0.503	0.268	3.17927e-13	1	Macrophage
Rps9	2.19045e-17	1.42727	0.611	0.398	4.21925e-13	1	Macrophage
Ywhab	2.36504e-17	1.77745	0.383	0.153	4.55554e-13	1	Macrophage
Oaz1	3.98164e-17	1.18111	0.409	0.169	7.66943e-13	1	Macrophage
Cox6a1	4.30044e-17	0.652948	0.631	0.394	8.2835e-13	1	Macrophage
Ndufa4	5.55067e-17	0.580575	0.342	0.124	1.06917e-12	1	Macrophage
Hmgb1	8.82367e-17	0.689716	0.362	0.14	1.69962e-12	1	Macrophage
Nptn	1.28222e-16	2.55698	0.262	0.082	2.46981e-12	1	Macrophage
Rps21	2.43368e-16	1.40209	0.51	0.27	4.68776e-12	1	Macrophage
Rpsa	3.39426e-16	2.13554	0.463	0.239	6.53802e-12	1	Macrophage
Rsrp1	3.58742e-16	0.970099	0.477	0.234	6.91009e-12	1	Macrophage
Rrbp1	6.06447e-16	0.816576	0.537	0.298	1.16814e-11	1	Macrophage
Rpl6	1.14604e-15	1.31871	0.443	0.217	2.20749e-11	1	Macrophage
Rps14	1.27246e-15	0.929964	0.792	0.629	2.45101e-11	1	Macrophage
Nucks1	1.33849e-15	2.57841	0.302	0.108	2.57821e-11	1	Macrophage
Tnrc6a	1.58141e-15	1.05991	0.255	0.081	3.0461e-11	1	Macrophage
Hexa	3.82806e-15	1.6702	0.349	0.146	7.3736e-11	1	Macrophage
Scamp2	6.90045e-15	1.5975	0.47	0.237	1.32916e-10	1	Macrophage
mt-Nd2	7.2087e-15	0.340067	0.577	0.316	1.38854e-10	1	Macrophage
Os9	1.06393e-14	1.04781	0.275	0.096	2.04934e-10	1	Macrophage
Nars	1.24987e-14	1.21317	0.302	0.113	2.40751e-10	1	Macrophage
Rpl5	1.27683e-14	1.26951	0.376	0.169	2.45943e-10	1	Macrophage
Cd2ap	2.96243e-14	0.604377	0.275	0.095	5.70624e-10	1	Macrophage
Slc3a2	4.22334e-14	1.50722	0.322	0.129	8.13499e-10	1	Macrophage
Nfe2l1	6.09049e-14	1.16978	0.262	0.09	1.17315e-09	1	Macrophage
Atox1	9.63532e-14	1.51869	0.396	0.192	1.85595e-09	1	Macrophage
Prdx2	1.34536e-13	0.43884	0.289	0.105	2.59144e-09	1	Macrophage
Rps2	1.51547e-13	1.05535	0.497	0.283	2.9191e-09	1	Macrophage
Nol7	1.54805e-13	2.22584	0.275	0.102	2.98185e-09	1	Macrophage
Tmbim6	1.57742e-13	1.76462	0.477	0.268	3.03842e-09	1	Macrophage
Tcf25	1.83036e-13	1.16603	0.315	0.123	3.52563e-09	1	Macrophage
App	2.08456e-13	0.906775	0.336	0.141	4.01529e-09	1	Macrophage
Phf20l1	4.52653e-13	1.36052	0.255	0.091	8.71901e-09	1	Macrophage
Rpl23	5.03141e-13	0.94776	0.577	0.379	9.69149e-09	1	Macrophage
Rpl22	6.13936e-13	0.85617	0.45	0.235	1.18256e-08	1	Macrophage
Capza2	6.65057e-13	1.84907	0.289	0.114	1.28103e-08	1	Macrophage
Cyb5a	7.03086e-13	0.563362	0.275	0.103	1.35428e-08	1	Macrophage
Arpc2	8.03487e-13	0.769789	0.644	0.471	1.54768e-08	1	Macrophage
Atp6v0e	1.18009e-12	0.992765	0.315	0.131	2.27309e-08	1	Macrophage
Ddrgk1	1.56754e-12	0.948182	0.336	0.147	3.01939e-08	1	Macrophage
Rbm39	1.80365e-12	0.686561	0.503	0.277	3.47419e-08	1	Macrophage
Rps3a1	1.86479e-12	1.01088	0.389	0.187	3.59197e-08	1	Macrophage
Lamp2	1.90464e-12	0.642514	0.289	0.114	3.66872e-08	1	Macrophage
Rtn4	1.92071e-12	0.898666	0.302	0.124	3.69967e-08	1	Macrophage
Rps27	2.14668e-12	1.0457	0.51	0.326	4.13494e-08	1	Macrophage
Gm9843	3.71185e-12	2.94281	0.262	0.101	7.14977e-08	1	Macrophage
Lamp1	3.71779e-12	0.875051	0.597	0.435	7.16121e-08	1	Macrophage
Rpl18a	4.52014e-12	1.22565	0.557	0.371	8.7067e-08	1	Macrophage
Rack1	7.56217e-12	0.870618	0.416	0.217	1.45662e-07	1	Macrophage
Cst9	1.08085e-11	0.508279	0.342	0.147	2.08194e-07	1	Macrophage
Rps5	1.15904e-11	0.92106	0.597	0.432	2.23254e-07	1	Macrophage
AC149090.1	1.44754e-11	1.39257	0.268	0.107	2.78825e-07	1	Macrophage
Klf4	1.80648e-11	3.4308	0.282	0.118	3.47965e-07	1	Macrophage
Sqstm1	2.13805e-11	0.700399	0.262	0.102	4.1183e-07	1	Macrophage
Ndufa1	2.8192e-11	0.428142	0.342	0.15	5.43035e-07	1	Macrophage
Ctage5	2.91043e-11	0.517749	0.295	0.124	5.60606e-07	1	Macrophage
Hp1bp3	3.73698e-11	2.74569	0.275	0.11	7.19816e-07	1	Macrophage
Prdx1	4.3767e-11	0.440905	0.416	0.212	8.43039e-07	1	Macrophage
Tmem234	7.12008e-11	0.816373	0.322	0.151	1.37147e-06	1	Macrophage
Rpl38	9.51744e-11	0.956753	0.45	0.269	1.83325e-06	1	Macrophage
Aif1	1.03011e-10	0.630566	0.55	0.321	1.9842e-06	1	Macrophage
Rpl37a	1.12118e-10	0.887551	0.503	0.318	2.15962e-06	1	Macrophage
Ndufv3	1.30622e-10	3.23125	0.295	0.133	2.51604e-06	1	Macrophage
Rgs10	2.17245e-10	1.35179	0.309	0.146	4.18458e-06	1	Macrophage
Rpl11	2.18139e-10	0.857864	0.584	0.425	4.2018e-06	1	Macrophage
Arid4a	2.7947e-10	2.19458	0.282	0.123	5.38315e-06	1	Macrophage
Anp32b	3.45478e-10	0.520472	0.376	0.188	6.65459e-06	1	Macrophage
Rps16	4.11002e-10	1.64026	0.389	0.221	7.91673e-06	1	Macrophage
Canx	4.26011e-10	0.96666	0.49	0.307	8.20582e-06	1	Macrophage
Rpl27a	5.21405e-10	0.920531	0.403	0.225	1.00433e-05	1	Macrophage
Prrc2c	5.54619e-10	0.696495	0.389	0.21	1.06831e-05	1	Macrophage
Tmed10	5.8781e-10	1.23059	0.362	0.189	1.13224e-05	1	Macrophage
Ptp4a2	5.92848e-10	0.90436	0.336	0.169	1.14194e-05	1	Macrophage
Rps6	6.41493e-10	1.84425	0.376	0.209	1.23564e-05	1	Macrophage
Tpt1	6.76696e-10	1.12171	0.537	0.388	1.30345e-05	1	Macrophage
Aplp2	1.00814e-09	0.643503	0.389	0.215	1.94188e-05	1	Macrophage
Gdi2	1.27239e-09	1.27363	0.409	0.24	2.45087e-05	1	Macrophage
Tmed3	1.27481e-09	2.97255	0.255	0.106	2.45553e-05	1	Macrophage
Rpl9	1.28065e-09	1.08306	0.456	0.282	2.46679e-05	1	Macrophage
Rpl35	1.37143e-09	0.751478	0.369	0.203	2.64166e-05	1	Macrophage
Rpl27	1.48826e-09	1.90628	0.403	0.228	2.86668e-05	1	Macrophage
Ppia	1.55254e-09	0.702826	0.503	0.329	2.99051e-05	1	Macrophage
Tpr	1.68223e-09	0.919791	0.456	0.267	3.24031e-05	1	Macrophage
Pak2	2.00485e-09	3.31278	0.255	0.111	3.86174e-05	1	Macrophage
Psma2	2.26339e-09	0.616247	0.349	0.179	4.35974e-05	1	Macrophage
Bnip2	2.56231e-09	1.38895	0.295	0.136	4.93553e-05	1	Macrophage
Top1	2.66947e-09	0.588289	0.362	0.19	5.14193e-05	1	Macrophage
Kmt2e	3.02079e-09	2.21985	0.322	0.163	5.81864e-05	1	Macrophage
Rpl35a	4.25958e-09	0.723366	0.43	0.259	8.20481e-05	1	Macrophage
Srrm1	4.5005e-09	0.493243	0.409	0.232	8.66887e-05	1	Macrophage
Rpl21	5.11096e-09	1.29066	0.463	0.308	9.84473e-05	1	Macrophage
Calr	5.76483e-09	0.49825	0.651	0.495	0.000111042	1	Macrophage
Rps12	7.3471e-09	0.72977	0.557	0.409	0.00014152	1	Macrophage
Anxa2	7.50956e-09	1.46534	0.255	0.113	0.000144649	1	Macrophage
Tmem59	3.27043e-08	0.975651	0.295	0.15	0.00062995	1	Macrophage
Prpf38b	4.54518e-08	0.903961	0.416	0.267	0.000875493	1	Macrophage
Dbi	5.13761e-08	0.648654	0.369	0.217	0.000989606	1	Macrophage
Gm2a	7.58999e-08	0.33464	0.349	0.194	0.00146198	1	Macrophage
Pomp	7.92492e-08	1.02705	0.322	0.177	0.0015265	1	Macrophage
Romo1	9.07529e-08	0.48857	0.275	0.138	0.00174808	1	Macrophage
Rps25	9.74212e-08	1.23235	0.503	0.365	0.00187653	1	Macrophage
Fuca1	9.78599e-08	0.973789	0.322	0.174	0.00188498	1	Macrophage
Rpl18	1.0374e-07	0.84027	0.49	0.355	0.00199824	1	Macrophage
Uqcr11	1.17538e-07	0.397436	0.356	0.199	0.00226402	1	Macrophage
Luc7l2	1.19788e-07	0.735052	0.409	0.248	0.00230737	1	Macrophage
Srrm2	1.19885e-07	0.595365	0.47	0.307	0.00230923	1	Macrophage
Hnrnpa2b1	1.52566e-07	0.300216	0.577	0.394	0.00293872	1	Macrophage
Rps24	2.12026e-07	0.902012	0.671	0.584	0.00408405	1	Macrophage
Rpl17	2.27219e-07	2.13099	0.396	0.263	0.00437669	1	Macrophage
Snrpb	2.55301e-07	0.260168	0.336	0.178	0.00491761	1	Macrophage
Arl6ip1	2.60659e-07	0.251984	0.537	0.358	0.00502081	1	Macrophage
Sec62	2.7627e-07	0.459071	0.309	0.166	0.0053215	1	Macrophage
Rps15a	3.29247e-07	0.788326	0.55	0.412	0.00634195	1	Macrophage
Fyb	3.38671e-07	1.55608	0.302	0.166	0.00652349	1	Macrophage
Prpf4b	3.67358e-07	1.01222	0.275	0.144	0.00707606	1	Macrophage
Smdt1	3.94506e-07	0.967387	0.315	0.176	0.00759898	1	Macrophage
Cox7a2l	4.50681e-07	0.822794	0.315	0.178	0.00868102	1	Macrophage
Pkm	5.34727e-07	1.51525	0.275	0.14	0.0102999	1	Macrophage
Rps10	5.83454e-07	1.05648	0.389	0.255	0.0112385	1	Macrophage
Chchd2	6.07266e-07	0.281497	0.564	0.422	0.0116972	1	Macrophage
Ssb	8.07452e-07	0.493528	0.356	0.201	0.0155531	1	Macrophage
Rps28	9.59642e-07	0.907453	0.43	0.283	0.0184846	1	Macrophage
Rpl41	1.08873e-06	0.45749	0.604	0.507	0.0209711	1	Macrophage
Fkbp3	1.12389e-06	0.809115	0.289	0.148	0.0216484	1	Macrophage
Rpl13	1.15522e-06	0.523654	0.624	0.527	0.0222519	1	Macrophage
Eef1b2	1.30384e-06	1.20256	0.376	0.241	0.0251145	1	Macrophage
Ddx6	1.34657e-06	0.572127	0.268	0.141	0.0259376	1	Macrophage
Srsf5	2.28787e-06	1.23776	0.322	0.189	0.044069	1	Macrophage
Myl12b	2.39913e-06	1.02642	0.255	0.136	0.046212	1	Macrophage
Rpl31	2.43681e-06	1.43188	0.409	0.282	0.0469377	1	Macrophage
2018-09-07	2.76761e-06	1.06756	0.315	0.186	0.0533098	1	Macrophage
Rpl4	2.77114e-06	0.608914	0.53	0.402	0.0533777	1	Macrophage
Son	4.25205e-06	0.824942	0.483	0.359	0.0819031	1	Macrophage
Tln1	6.26649e-06	1.26063	0.295	0.179	0.120705	1	Macrophage
Rps18	6.82676e-06	0.860452	0.45	0.351	0.131497	1	Macrophage
Smc5	8.4538e-06	0.55215	0.141	0.32	0.162837	1	Macrophage
Rps13	9.20623e-06	1.28462	0.49	0.386	0.17733	1	Macrophage
Rbms1	1.53593e-05	1.34966	0.268	0.149	0.295851	1	Macrophage
Psmb2	1.56287e-05	0.321454	0.295	0.175	0.30104	1	Macrophage
Tm9sf3	1.62709e-05	0.819593	0.289	0.172	0.31341	1	Macrophage
Rpl30	2.36481e-05	1.08244	0.463	0.35	0.45551	1	Macrophage
Sdf4	2.37719e-05	0.77365	0.342	0.228	0.457893	1	Macrophage
Arpp19	2.56888e-05	1.02348	0.302	0.182	0.494818	1	Macrophage
Eef1a1	2.70505e-05	0.531056	0.537	0.446	0.521046	1	Macrophage
Rpl37	3.08663e-05	0.704773	0.456	0.364	0.594546	1	Macrophage
Rps15	4.83136e-05	0.749529	0.43	0.33	0.930616	1	Macrophage
Hnrnpa3	5.19321e-05	0.844796	0.329	0.218	1	1	Macrophage
Ankrd11	5.51351e-05	1.47807	0.302	0.192	1	1	Macrophage
Aldoa	5.64388e-05	0.460523	0.309	0.197	1	1	Macrophage
Nme1	8.7295e-05	0.485803	0.262	0.153	1	1	Macrophage
Rpl32	8.789e-05	0.64747	0.624	0.567	1	1	Macrophage
Hmgb2	0.000102717	0.415243	0.302	0.181	1	1	Macrophage
Thrap3	0.00010326	1.13466	0.275	0.169	1	1	Macrophage
Bclaf1	0.000153555	0.361806	0.315	0.203	1	1	Macrophage
Ccnl1	0.000163903	1.44557	0.275	0.176	1	1	Macrophage
Rpl29	0.000216577	0.425849	0.315	0.209	1	1	Macrophage
Nudt9	0.00026493	0.302449	0.128	0.266	1	1	Macrophage
Rpl7	0.000317449	0.477085	0.356	0.265	1	1	Macrophage
Rps26	0.000329614	0.657337	0.49	0.399	1	1	Macrophage
Prdx5	0.000389328	0.286883	0.322	0.225	1	1	Macrophage
Pdia3	0.00039557	0.707984	0.456	0.366	1	1	Macrophage
Atp5g1	0.00041385	0.422292	0.282	0.185	1	1	Macrophage
Pbrm1	0.000448787	0.855125	0.255	0.164	1	1	Macrophage
Rpl12	0.000465147	0.850036	0.383	0.287	1	1	Macrophage
Atp5f1	0.000487585	0.395068	0.409	0.311	1	1	Macrophage
G3bp2	0.000519781	0.839201	0.315	0.218	1	1	Macrophage
Wasf2	0.000617813	0.515381	0.255	0.16	1	1	Macrophage
Rpl26	0.000625555	0.349273	0.557	0.522	1	1	Macrophage
Rpl34	0.000656151	0.410381	0.362	0.269	1	1	Macrophage
Cdk11b	0.000684102	0.391695	0.362	0.261	1	1	Macrophage
Ndufc2	0.000715063	0.282528	0.282	0.189	1	1	Macrophage
Atp5a1	0.000781136	0.293356	0.376	0.285	1	1	Macrophage
Hint1	0.000904553	0.402547	0.45	0.372	1	1	Macrophage
Brd2	0.00107286	0.611876	0.201	0.339	1	1	Macrophage
Rpl28	0.00123392	0.577555	0.289	0.2	1	1	Macrophage
Slc25a3	0.00180639	0.549535	0.322	0.238	1	1	Macrophage
Uqcr10	0.00191944	0.75712	0.362	0.299	1	1	Macrophage
Rpl7a	0.00202008	0.342473	0.369	0.287	1	1	Macrophage
Dnajc3	0.00221194	0.45817	0.309	0.214	1	1	Macrophage
Fus	0.00269259	0.297268	0.369	0.277	1	1	Macrophage
Ube2b	0.00279311	0.386086	0.275	0.419	1	1	Macrophage
Gas5	0.00287993	0.280451	0.268	0.188	1	1	Macrophage
Rbm8a	0.00315346	0.430094	0.262	0.176	1	1	Macrophage
Atp5g3	0.003357	0.346066	0.262	0.183	1	1	Macrophage
Bbx	0.00345089	1.88079	0.161	0.264	1	1	Macrophage
Rpl8	0.00417929	0.423435	0.57	0.552	1	1	Macrophage
Rps7	0.00450227	0.361059	0.497	0.442	1	1	Macrophage
Tmem147	0.00466783	0.438416	0.255	0.182	1	1	Macrophage
Pnn	0.00523383	0.37222	0.329	0.249	1	1	Macrophage
Ythdc1	0.00575591	0.663144	0.302	0.217	1	1	Macrophage
Ssr2	0.00605005	0.756623	0.262	0.18	1	1	Macrophage
Erp29	0.00619849	0.630893	0.376	0.313	1	1	Macrophage
Serf2	0.00621698	0.528135	0.322	0.251	1	1	Macrophage
Atp5h	0.00754357	0.427094	0.403	0.347	1	1	Macrophage
Ap2s1	0.00776316	0.310114	0.262	0.189	1	1	Macrophage
Selenof	0.00992917	0.353614	0.309	0.245	1	1	Macrophage
Dcn	0	8.0073	0.969	0.037	0	2	Telocyte
Gsn	0	7.56493	0.838	0.026	0	2	Telocyte
Adamts5	0	7.21566	0.75	0.006	0	2	Telocyte
Col1a2	0	6.57687	0.731	0.014	0	2	Telocyte
Mgp	0	6.46074	0.688	0.009	0	2	Telocyte
Plpp3	0	6.17502	0.756	0.032	0	2	Telocyte
Cyp26b1	0	5.9208	0.538	0.007	0	2	Telocyte
Ltbp4	0	5.91123	0.45	0.003	0	2	Telocyte
Rarres2	0	5.82454	0.431	0.005	0	2	Telocyte
Clec3b	0	5.75724	0.269	0.002	0	2	Telocyte
Fgl2	0	5.72808	0.588	0.008	0	2	Telocyte
Sparcl1	0	5.65441	0.656	0.035	0	2	Telocyte
Fhl2	0	5.52428	0.369	0.003	0	2	Telocyte
Igfbp6	0	5.47416	0.575	0.018	0	2	Telocyte
Cd34	0	5.36809	0.412	0.005	0	2	Telocyte
Lamb1	0	5.31942	0.5	0.016	0	2	Telocyte
S100a6	0	5.30848	0.45	0.006	0	2	Telocyte
Serping1	0	5.26552	0.631	0.033	0	2	Telocyte
Bgn	0	5.2513	0.306	0.003	0	2	Telocyte
Tcf21	0	5.22363	0.256	0.003	0	2	Telocyte
Igf1	0	5.17147	0.581	0.017	0	2	Telocyte
Cd200	0	5.13187	0.275	0.003	0	2	Telocyte
Col3a1	0	5.1172	0.519	0.012	0	2	Telocyte
Ogn	0	5.04244	0.488	0.016	0	2	Telocyte
Ifitm3	0	5.02304	0.456	0.014	0	2	Telocyte
Lama2	0	4.96146	0.438	0.017	0	2	Telocyte
Osr1	0	4.94943	0.275	0.005	0	2	Telocyte
Pdgfra	0	4.93735	0.425	0.012	0	2	Telocyte
Id3	0	4.90744	0.281	0.005	0	2	Telocyte
Cald1	0	4.88114	0.481	0.02	0	2	Telocyte
Col4a4	0	4.82886	0.356	0.007	0	2	Telocyte
Entpd2	0	4.80494	0.338	0.005	0	2	Telocyte
Itih5	0	4.71277	0.306	0.007	0	2	Telocyte
Col4a1	0	4.6796	0.325	0.009	0	2	Telocyte
Col6a1	0	4.66842	0.294	0.005	0	2	Telocyte
Efemp1	0	4.57636	0.325	0.009	0	2	Telocyte
Pltp	0	4.4151	0.3	0.007	0	2	Telocyte
Nrk	2.38377e-303	4.87623	0.275	0.006	4.59161e-299	2	Telocyte
Ecm2	1.1499e-297	4.62388	0.288	0.007	2.21493e-293	2	Telocyte
Dpep1	1.86097e-286	4.5696	0.256	0.006	3.5846e-282	2	Telocyte
Ahnak	2.3114e-273	4.49483	0.425	0.019	4.45222e-269	2	Telocyte
Sulf2	1.03466e-267	4.27434	0.288	0.008	1.99296e-263	2	Telocyte
Ebf1	8.34776e-264	4.71705	0.269	0.007	1.60795e-259	2	Telocyte
C1s1	3.79426e-254	4.57996	0.325	0.011	7.3085e-250	2	Telocyte
Htra3	4.97553e-247	4.59645	0.344	0.013	9.58386e-243	2	Telocyte
Tgfbi	1.97571e-236	4.24124	0.338	0.013	3.80561e-232	2	Telocyte
Cyp27a1	7.02253e-234	4.49068	0.325	0.013	1.35268e-229	2	Telocyte
Tshz2	5.27215e-222	4.55923	0.444	0.026	1.01552e-217	2	Telocyte
Nr2f2	2.9036e-220	4.6769	0.35	0.016	5.59292e-216	2	Telocyte
Maf	3.44666e-205	3.94351	0.369	0.019	6.63896e-201	2	Telocyte
Serpinf1	4.14269e-205	4.2984	0.306	0.013	7.97964e-201	2	Telocyte
Fstl1	5.17198e-189	4.33539	0.269	0.011	9.96226e-185	2	Telocyte
Lrp1	1.76717e-187	4.12973	0.288	0.012	3.40392e-183	2	Telocyte
S100a10	2.1808e-184	3.97918	0.419	0.028	4.20066e-180	2	Telocyte
Lamb2	4.55703e-184	4.26498	0.319	0.016	8.77775e-180	2	Telocyte
Igfbp7	2.50441e-175	3.5629	0.656	0.075	4.824e-171	2	Telocyte
Cp	1.86796e-173	4.40616	0.375	0.024	3.59806e-169	2	Telocyte
Rcn3	1.61454e-165	4.19462	0.281	0.014	3.10992e-161	2	Telocyte
Selenbp1	4.23704e-152	4.35996	0.331	0.021	8.16139e-148	2	Telocyte
Rbbp7	2.1935e-144	4.45995	0.656	0.097	4.22511e-140	2	Telocyte
Tgfbr3	9.59583e-144	4.14142	0.319	0.02	1.84835e-139	2	Telocyte
Gpx3	9.06207e-135	3.88989	0.269	0.015	1.74554e-130	2	Telocyte
Igf2	2.24724e-130	4.11475	0.275	0.017	4.32864e-126	2	Telocyte
Cped1	9.65571e-128	3.75155	0.256	0.015	1.85988e-123	2	Telocyte
Apoe	1.05133e-116	1.19617	0.744	0.15	2.02508e-112	2	Telocyte
Prss35	1.28476e-109	3.93664	0.275	0.02	2.4747e-105	2	Telocyte
Malat1	1.19197e-107	1.68912	1	0.486	2.29597e-103	2	Telocyte
Cd302	1.0369e-103	3.63876	0.438	0.053	1.99728e-99	2	Telocyte
Aebp1	1.38814e-103	3.76143	0.256	0.018	2.67384e-99	2	Telocyte
Rnase4	1.94131e-103	3.28852	0.281	0.022	3.73936e-99	2	Telocyte
Timp2	8.48692e-100	3.64968	0.662	0.136	1.63475e-95	2	Telocyte
Zbtb20	4.90931e-97	4.41473	0.494	0.075	9.45632e-93	2	Telocyte
Rps4x	1.80429e-95	3.23121	0.369	0.041	3.47542e-91	2	Telocyte
Gstm1	3.03653e-93	0.439354	0.756	0.179	5.84897e-89	2	Telocyte
Bicc1	2.79191e-92	4.11659	0.256	0.021	5.37777e-88	2	Telocyte
Sparc	8.09493e-88	1.58724	0.7	0.166	1.55924e-83	2	Telocyte
Ecm1	8.33489e-86	3.72234	0.256	0.022	1.60547e-81	2	Telocyte
Cxcl12	2.88414e-84	3.94955	0.281	0.027	5.55543e-80	2	Telocyte
Sptbn1	9.89671e-84	4.59252	0.538	0.104	1.9063e-79	2	Telocyte
Anxa5	5.17858e-82	3.37906	0.269	0.025	9.97499e-78	2	Telocyte
Cst3	2.14388e-78	1.54829	0.775	0.235	4.12955e-74	2	Telocyte
Selenop	3.57091e-78	1.19757	0.475	0.078	6.87829e-74	2	Telocyte
Gm37376	1.58509e-68	2.97652	0.319	0.042	3.0532e-64	2	Telocyte
Fth1	8.33323e-67	2.26749	0.8	0.333	1.60515e-62	2	Telocyte
Heg1	4.8747e-66	3.42378	0.262	0.029	9.38965e-62	2	Telocyte
Nedd4	1.68468e-64	3.12898	0.444	0.086	3.24504e-60	2	Telocyte
Fxyd1	1.1778e-63	2.33217	0.362	0.054	2.26868e-59	2	Telocyte
Atrx	1.64625e-63	3.50359	0.431	0.08	3.171e-59	2	Telocyte
Vim	2.44917e-63	3.5702	0.375	0.062	4.71759e-59	2	Telocyte
Smoc2	9.83136e-60	4.01996	0.325	0.05	1.89372e-55	2	Telocyte
Anxa2	5.71657e-59	3.41521	0.481	0.111	1.10113e-54	2	Telocyte
Mbnl1	5.29186e-58	3.01923	0.275	0.036	1.01932e-53	2	Telocyte
Cd47	1.05125e-57	2.37531	0.381	0.068	2.02492e-53	2	Telocyte
Txnip	3.57134e-56	4.13821	0.312	0.049	6.87912e-52	2	Telocyte
Aldh2	4.70193e-56	1.79335	0.406	0.076	9.05685e-52	2	Telocyte
Mmd2	5.81436e-56	3.33676	0.306	0.046	1.11996e-51	2	Telocyte
Gnas	1.64034e-55	1.7854	0.594	0.167	3.15962e-51	2	Telocyte
mt-Rnr2	1.26162e-52	1.0977	1	0.92	2.43013e-48	2	Telocyte
App	1.97546e-51	2.91714	0.512	0.139	3.80514e-47	2	Telocyte
Pgrmc1	6.96632e-51	2.72125	0.525	0.147	1.34185e-46	2	Telocyte
Gm42418	1.25808e-49	2.3524	0.6	0.194	2.42332e-45	2	Telocyte
Aldh1a1	2.64278e-49	0.623109	0.45	0.102	5.09052e-45	2	Telocyte
Zfp36l1	3.1759e-49	3.33839	0.262	0.039	6.11742e-45	2	Telocyte
Itgb1	9.95865e-48	3.04393	0.362	0.074	1.91823e-43	2	Telocyte
Nenf	6.74404e-47	3.06239	0.288	0.047	1.29904e-42	2	Telocyte
Mir99ahg	3.27582e-46	3.3432	0.312	0.057	6.30989e-42	2	Telocyte
Rpl10	4.29756e-46	2.13249	0.362	0.075	8.27796e-42	2	Telocyte
Slc25a4	6.89512e-44	2.40158	0.388	0.088	1.32814e-39	2	Telocyte
Psap	1.04292e-42	2.08011	0.35	0.075	2.00886e-38	2	Telocyte
Cd81	6.64808e-41	3.04778	0.381	0.087	1.28055e-36	2	Telocyte
Prlr	7.31483e-40	1.04192	0.325	0.064	1.40898e-35	2	Telocyte
Cd63	9.91069e-40	2.34794	0.45	0.132	1.909e-35	2	Telocyte
Acsbg1	5.70335e-39	1.21246	0.356	0.078	1.09858e-34	2	Telocyte
Vcam1	1.00431e-38	0.699778	0.356	0.077	1.9345e-34	2	Telocyte
Rpl36a	6.28814e-38	2.86511	0.3	0.062	1.21122e-33	2	Telocyte
Tceal9	2.20041e-35	0.612332	0.35	0.082	4.23842e-31	2	Telocyte
Tuba1a	3.99415e-35	1.58833	0.256	0.048	7.69353e-31	2	Telocyte
B2m	1.42888e-34	0.635683	0.369	0.094	2.7523e-30	2	Telocyte
Tcf4	1.55589e-34	3.52378	0.356	0.094	2.99696e-30	2	Telocyte
Emp3	1.63623e-34	1.87083	0.312	0.071	3.1517e-30	2	Telocyte
Slc29a1	9.11675e-32	2.49923	0.312	0.077	1.75607e-27	2	Telocyte
Glul	1.36421e-31	1.99758	0.55	0.218	2.62774e-27	2	Telocyte
Tmem50a	1.24141e-30	2.31645	0.306	0.075	2.39121e-26	2	Telocyte
Mylk	5.05341e-30	3.22281	0.262	0.058	9.73388e-26	2	Telocyte
mt-Rnr1	1.95424e-27	1.08588	0.588	0.269	3.76425e-23	2	Telocyte
Ssr3	2.76751e-26	2.90818	0.281	0.073	5.33078e-22	2	Telocyte
Gpx1	4.409e-26	0.99743	0.275	0.068	8.49262e-22	2	Telocyte
Sqstm1	2.03055e-24	3.13885	0.325	0.101	3.91124e-20	2	Telocyte
Txn1	4.13293e-23	1.34391	0.288	0.08	7.96085e-19	2	Telocyte
Rock2	4.69137e-23	2.08983	0.319	0.099	9.03651e-19	2	Telocyte
Jak1	4.93858e-23	2.41283	0.269	0.074	9.51269e-19	2	Telocyte
Add3	3.65748e-22	2.10677	0.4	0.159	7.04504e-18	2	Telocyte
Rsrp1	7.17426e-22	2.57965	0.5	0.233	1.38191e-17	2	Telocyte
Lamp2	1.2369e-21	1.85354	0.338	0.114	2.38252e-17	2	Telocyte
Plcb4	3.69731e-21	1.95322	0.262	0.076	7.12176e-17	2	Telocyte
Atp2b1	1.48152e-19	1.14834	0.262	0.078	2.8537e-15	2	Telocyte
Pcolce	1.67493e-18	1.32944	0.262	0.079	3.22625e-14	2	Telocyte
Prrc2c	1.80004e-18	2.2326	0.444	0.209	3.46723e-14	2	Telocyte
Rbm39	4.98136e-18	1.62112	0.512	0.277	9.5951e-14	2	Telocyte
Prpf4b	7.82738e-18	3.11278	0.35	0.143	1.50771e-13	2	Telocyte
Actb	1.1884e-17	0.985705	0.725	0.607	2.2891e-13	2	Telocyte
Luc7l3	2.03506e-17	2.52622	0.406	0.184	3.91994e-13	2	Telocyte
Rplp1	9.2593e-17	0.89751	0.681	0.511	1.78353e-12	2	Telocyte
Hsp90ab1	1.62121e-16	0.616903	0.638	0.411	3.12278e-12	2	Telocyte
Ppib	3.60066e-16	2.02347	0.338	0.138	6.93559e-12	2	Telocyte
Gas5	4.32102e-16	2.18027	0.388	0.187	8.32314e-12	2	Telocyte
1700003E16Rik	4.35872e-16	0.292298	0.025	0.343	8.39576e-12	2	Telocyte
Cdc42	1.88302e-15	1.35479	0.344	0.146	3.62708e-11	2	Telocyte
Pnisr	1.94379e-15	1.53807	0.444	0.227	3.74414e-11	2	Telocyte
Itm2b	5.36104e-15	0.890841	0.55	0.368	1.03264e-10	2	Telocyte
Creg1	5.73538e-15	1.81864	0.262	0.092	1.10475e-10	2	Telocyte
Tmed3	1.26254e-14	1.2511	0.281	0.105	2.43191e-10	2	Telocyte
Hp1bp3	2.25306e-14	2.39388	0.281	0.11	4.33985e-10	2	Telocyte
Sec62	3.10501e-14	1.47368	0.356	0.165	5.98087e-10	2	Telocyte
Ncl	6.91842e-14	0.266052	0.469	0.229	1.33263e-09	2	Telocyte
Akap9	1.21704e-13	2.1306	0.356	0.173	2.34426e-09	2	Telocyte
Rps3	3.69977e-13	1.02364	0.494	0.295	7.1265e-09	2	Telocyte
Lgals1	5.00871e-13	1.67244	0.281	0.117	9.64778e-09	2	Telocyte
Tcf25	7.56956e-13	1.69919	0.294	0.123	1.45805e-08	2	Telocyte
Bclaf1	1.7895e-12	2.37156	0.388	0.202	3.44693e-08	2	Telocyte
Rpl14	2.49184e-12	0.926244	0.475	0.272	4.79979e-08	2	Telocyte
Rrbp1	4.51449e-12	1.91213	0.469	0.299	8.69581e-08	2	Telocyte
Laptm4a	1.01015e-11	1.06646	0.538	0.405	1.94576e-07	2	Telocyte
2018-09-07	2.48288e-11	1.42486	0.35	0.186	4.78252e-07	2	Telocyte
Rbms1	3.36054e-11	1.96105	0.306	0.148	6.47307e-07	2	Telocyte
Fus	1.01336e-10	1.24252	0.444	0.276	1.95193e-06	2	Telocyte
Slmap	1.93752e-10	2.81206	0.269	0.122	3.73206e-06	2	Telocyte
Penk	2.9987e-10	2.59968	0.356	0.205	5.77609e-06	2	Telocyte
Ptma	3.76856e-10	0.421358	0.288	0.13	7.259e-06	2	Telocyte
Pnn	9.38705e-10	1.45052	0.412	0.249	1.80813e-05	2	Telocyte
Dph3	1.18491e-09	0.26616	0.038	0.256	2.28238e-05	2	Telocyte
Nkapl	1.43198e-09	0.37278	0.081	0.316	2.75828e-05	2	Telocyte
Hmgb1	3.34603e-09	0.54972	0.288	0.141	6.44512e-05	2	Telocyte
Eif3b	3.88519e-09	0.272755	0.075	0.309	7.48366e-05	2	Telocyte
Rps8	4.64873e-09	1.092	0.456	0.318	8.95438e-05	2	Telocyte
Tpm3	5.4062e-09	2.98087	0.275	0.134	0.000104134	2	Telocyte
Psma7	6.30843e-09	0.61293	0.319	0.166	0.000121513	2	Telocyte
Serinc3	7.74842e-09	1.00723	0.356	0.208	0.00014925	2	Telocyte
Supt20	2.84319e-08	0.397954	0.131	0.366	0.000547656	2	Telocyte
Rpsa	2.94805e-08	1.16058	0.375	0.24	0.000567854	2	Telocyte
Rps14	1.02622e-07	0.51725	0.669	0.63	0.00197671	2	Telocyte
Hsp90b1	1.36006e-07	0.368528	0.706	0.587	0.00261975	2	Telocyte
Mff	1.50549e-07	0.754823	0.162	0.398	0.00289988	2	Telocyte
Kmt2e	1.94783e-07	0.87502	0.288	0.163	0.00375191	2	Telocyte
Ssb	3.15613e-07	1.03846	0.35	0.201	0.00607933	2	Telocyte
Rbm25	3.31079e-07	0.996662	0.538	0.445	0.00637724	2	Telocyte
Rpl3	4.22712e-07	1.08861	0.375	0.255	0.00814227	2	Telocyte
Rpl4	4.70404e-07	0.890625	0.494	0.402	0.00906092	2	Telocyte
Ywhab	5.90646e-07	0.900286	0.275	0.154	0.011377	2	Telocyte
Srsf11	6.86123e-07	1.00005	0.431	0.31	0.0132161	2	Telocyte
Hspa8	6.94233e-07	1.30705	0.256	0.137	0.0133723	2	Telocyte
Rps9	9.38597e-07	0.923524	0.488	0.399	0.0180793	2	Telocyte
Hnrnpa2b1	1.18106e-06	0.355171	0.55	0.394	0.0227495	2	Telocyte
Son	1.27504e-06	1.07115	0.456	0.359	0.0245597	2	Telocyte
Cbx5	1.32147e-06	1.66364	0.294	0.182	0.0254541	2	Telocyte
Rps3a1	5.00217e-06	1.23312	0.3	0.188	0.0963517	2	Telocyte
Cyb5r3	5.08764e-06	0.457666	0.256	0.147	0.0979982	2	Telocyte
Rpl6	5.414e-06	1.03396	0.325	0.217	0.104284	2	Telocyte
Clpx	5.80308e-06	0.660911	0.1	0.279	0.111779	2	Telocyte
Rpl12	6.45154e-06	0.918567	0.388	0.287	0.12427	2	Telocyte
Ankrd12	7.92939e-06	1.33762	0.256	0.153	0.152736	2	Telocyte
Rpl5	9.32562e-06	1.35482	0.275	0.17	0.17963	2	Telocyte
Rab14	1.01005e-05	0.764686	0.275	0.166	0.194555	2	Telocyte
Rpl23a	1.94652e-05	1.22363	0.362	0.269	0.374939	2	Telocyte
Top1	3.26482e-05	0.92485	0.294	0.19	0.62887	2	Telocyte
Rpl13	3.81418e-05	0.52363	0.569	0.527	0.734687	2	Telocyte
Tpi1	3.89445e-05	0.436824	0.138	0.304	0.75015	2	Telocyte
Rack1	4.32494e-05	0.976598	0.319	0.218	0.833069	2	Telocyte
Rtn3	4.48733e-05	0.885094	0.112	0.272	0.864349	2	Telocyte
Arpc1a	4.71237e-05	0.252891	0.1	0.257	0.907696	2	Telocyte
Dnajc7	5.64181e-05	0.982	0.112	0.269	1	2	Telocyte
Rps2	5.72344e-05	0.586404	0.381	0.284	1	2	Telocyte
Sdf4	7.47099e-05	0.802228	0.319	0.228	1	2	Telocyte
Snrnp70	7.75764e-05	1.51442	0.356	0.263	1	2	Telocyte
Rps21	9.70838e-05	0.889126	0.362	0.271	1	2	Telocyte
Rps16	0.000102052	0.703259	0.312	0.221	1	2	Telocyte
Dbi	0.000105951	0.650358	0.325	0.217	1	2	Telocyte
Rps27a	0.000122159	0.44661	0.388	0.291	1	2	Telocyte
Tsc22d1	0.000124	0.495438	0.325	0.232	1	2	Telocyte
Mrpl54	0.000170111	1.84387	0.125	0.282	1	2	Telocyte
Gabarapl1	0.000198333	0.358288	0.138	0.282	1	2	Telocyte
Rplp2	0.000214613	0.529582	0.456	0.379	1	2	Telocyte
Srsf5	0.0002394	1.41264	0.269	0.189	1	2	Telocyte
Rsrc2	0.00028993	1.39155	0.312	0.235	1	2	Telocyte
Chd4	0.000421145	0.941636	0.431	0.368	1	2	Telocyte
Luc7l2	0.000481053	0.717312	0.325	0.249	1	2	Telocyte
Arglu1	0.000501274	2.04809	0.319	0.241	1	2	Telocyte
Mprip	0.000501996	0.648873	0.119	0.257	1	2	Telocyte
Tpr	0.000578662	0.519544	0.35	0.267	1	2	Telocyte
Prpf38b	0.000686427	0.784216	0.338	0.268	1	2	Telocyte
Cd164	0.000692128	0.404674	0.15	0.294	1	2	Telocyte
Cwc15	0.000725024	0.45884	0.156	0.305	1	2	Telocyte
Aplp2	0.000810404	0.485687	0.294	0.216	1	2	Telocyte
Rpl7	0.000812822	0.655772	0.331	0.265	1	2	Telocyte
Gps2	0.00120759	0.313659	0.131	0.265	1	2	Telocyte
Rps19	0.00122753	0.926485	0.362	0.301	1	2	Telocyte
Nedd8	0.00128901	0.27993	0.131	0.262	1	2	Telocyte
Rpl17	0.00133498	0.79549	0.331	0.264	1	2	Telocyte
Golgb1	0.00181789	1.95701	0.3	0.24	1	2	Telocyte
Aldoa	0.00184095	0.605791	0.269	0.197	1	2	Telocyte
Anp32b	0.00197222	0.295174	0.269	0.188	1	2	Telocyte
Rps5	0.00199136	0.802705	0.462	0.433	1	2	Telocyte
Ankrd11	0.0020684	2.85123	0.256	0.192	1	2	Telocyte
Rpl23	0.00215407	1.05495	0.425	0.381	1	2	Telocyte
Rdx	0.00239477	1.48685	0.4	0.368	1	2	Telocyte
Rbm5	0.00250041	0.832652	0.262	0.197	1	2	Telocyte
Eif3f	0.00251426	0.448687	0.156	0.291	1	2	Telocyte
Tmed10	0.00352336	0.371707	0.256	0.19	1	2	Telocyte
Gm2a	0.00380604	0.590342	0.262	0.194	1	2	Telocyte
Serbp1	0.00479027	0.5038	0.494	0.465	1	2	Telocyte
Capns1	0.00509471	0.409739	0.412	0.365	1	2	Telocyte
Ift20	0.00514095	1.40515	0.269	0.214	1	2	Telocyte
Use1	0.00536252	0.29399	0.175	0.307	1	2	Telocyte
Ralgps2	0.00548177	0.503215	0.412	0.374	1	2	Telocyte
Canx	0.00643593	0.521463	0.356	0.308	1	2	Telocyte
Hnrnpk	0.00848924	0.892122	0.281	0.229	1	2	Telocyte
Rpl21	0.00907414	0.788983	0.344	0.309	1	2	Telocyte
Trim7	0	5.40806	0.583	0.011	0	3	Sertoli
Ppp1r9a	0	4.94718	0.751	0.043	0	3	Sertoli
Daam2	0	4.89597	0.423	0.009	0	3	Sertoli
Clu	0	4.85115	0.952	0.215	0	3	Sertoli
Gm2044	0	4.84519	0.498	0.008	0	3	Sertoli
Trank1	0	4.68134	0.559	0.02	0	3	Sertoli
Kif21a	0	4.67935	0.688	0.049	0	3	Sertoli
Etl4	0	4.58156	0.417	0.01	0	3	Sertoli
Syne2	0	4.56295	0.775	0.102	0	3	Sertoli
Cldn11	0	4.52387	0.631	0.039	0	3	Sertoli
Etnk2	0	4.52375	0.613	0.031	0	3	Sertoli
Wipf3	0	4.47187	0.495	0.015	0	3	Sertoli
Tyro3	0	4.47039	0.258	0.007	0	3	Sertoli
Nfat5	0	4.42678	0.562	0.045	0	3	Sertoli
Cyb5r1	0	4.42544	0.486	0.03	0	3	Sertoli
Gprasp2	0	4.41177	0.366	0.01	0	3	Sertoli
Slc4a3	0	4.40434	0.252	0.005	0	3	Sertoli
Mro	0	4.40412	0.492	0.014	0	3	Sertoli
Klhl23	0	4.3897	0.529	0.031	0	3	Sertoli
Cgn	0	4.36558	0.511	0.024	0	3	Sertoli
Mum1l1	0	4.35678	0.769	0.075	0	3	Sertoli
Shbg	0	4.35112	0.357	0.008	0	3	Sertoli
Macf1	0	4.30502	0.757	0.089	0	3	Sertoli
Bcl2l2	0	4.24791	0.33	0.014	0	3	Sertoli
Gm14569	0	4.19866	0.673	0.048	0	3	Sertoli
Inha	0	4.18736	0.64	0.065	0	3	Sertoli
Gpm6b	0	4.17081	0.393	0.016	0	3	Sertoli
Gm14226	0	4.14647	0.285	0.006	0	3	Sertoli
Amhr2	0	4.06932	0.79	0.088	0	3	Sertoli
Ctnnal1	0	4.06554	0.444	0.018	0	3	Sertoli
Slc7a4	0	4.00217	0.351	0.019	0	3	Sertoli
Nxf3	0	3.98991	0.453	0.017	0	3	Sertoli
Agpat4	0	3.92261	0.369	0.014	0	3	Sertoli
Ptpre	0	3.85813	0.381	0.018	0	3	Sertoli
Tmem114	0	3.85447	0.345	0.014	0	3	Sertoli
Tnik	0	3.82333	0.312	0.013	0	3	Sertoli
Ttyh1	0	3.79651	0.55	0.04	0	3	Sertoli
Cpe	0	3.7391	0.697	0.075	0	3	Sertoli
Gprasp1	0	3.73041	0.405	0.026	0	3	Sertoli
Lpar3	0	3.72323	0.297	0.014	0	3	Sertoli
Reep1	0	3.69107	0.462	0.031	0	3	Sertoli
Adora1	0	3.64423	0.27	0.01	0	3	Sertoli
Map1b	0	3.59312	0.502	0.042	0	3	Sertoli
Wt1	0	3.55715	0.363	0.016	0	3	Sertoli
Mertk	0	3.55302	0.276	0.012	0	3	Sertoli
Slc52a3	0	3.54675	0.255	0.01	0	3	Sertoli
4632427E13Rik	0	3.5341	0.39	0.023	0	3	Sertoli
Atp1b1	0	3.49016	0.426	0.03	0	3	Sertoli
Sdc4	0	3.47079	0.556	0.052	0	3	Sertoli
Lsr	0	3.42624	0.423	0.021	0	3	Sertoli
Cst12	0	3.42173	0.835	0.132	0	3	Sertoli
Thoc2	0	3.38085	0.706	0.092	0	3	Sertoli
Slc30a2	0	3.32633	0.402	0.027	0	3	Sertoli
Atp2b1	0	3.28146	0.616	0.071	0	3	Sertoli
Cst9	0	3.19293	0.826	0.137	0	3	Sertoli
Tmem184a	0	2.64378	0.568	0.051	0	3	Sertoli
Sparc	9.48006e-305	2.44053	0.868	0.158	1.82605e-300	3	Sertoli
Vsig10	2.07974e-303	3.55371	0.306	0.016	4.006e-299	3	Sertoli
Atrx	1.25886e-294	2.31234	0.613	0.074	2.42482e-290	3	Sertoli
Map4k4	1.67099e-289	2.92888	0.399	0.03	3.21866e-285	3	Sertoli
Abcc1	2.16335e-289	3.97569	0.321	0.019	4.16705e-285	3	Sertoli
Ctsl	3.01233e-285	4.44577	0.874	0.186	5.80234e-281	3	Sertoli
Qpct	2.01292e-282	3.10361	0.366	0.025	3.87728e-278	3	Sertoli
Naalad2	4.44627e-282	3.24293	0.345	0.023	8.56441e-278	3	Sertoli
Diaph2	5.16299e-282	3.31872	0.336	0.021	9.94496e-278	3	Sertoli
Maged1	2.24751e-278	3.51854	0.655	0.094	4.32916e-274	3	Sertoli
Ncoa2	3.55494e-268	3.39031	0.42	0.037	6.84752e-264	3	Sertoli
Pabpn1	5.17976e-265	4.13812	0.492	0.053	9.97726e-261	3	Sertoli
Wnk3	3.95141e-264	3.358	0.279	0.015	7.61121e-260	3	Sertoli
Lrp8	1.78452e-261	3.84919	0.381	0.031	3.43735e-257	3	Sertoli
Gpatch8	4.58647e-256	3.92216	0.643	0.098	8.83445e-252	3	Sertoli
Hdac6	2.05545e-253	3.43804	0.375	0.03	3.95921e-249	3	Sertoli
Wfdc10	2.08423e-250	3.14622	0.489	0.054	4.01464e-246	3	Sertoli
Ogt	1.92509e-242	3.45016	0.339	0.026	3.70811e-238	3	Sertoli
Fbrsl1	4.58288e-242	3.73042	0.27	0.016	8.82755e-238	3	Sertoli
Clec12b	5.87702e-242	3.46895	0.273	0.016	1.13203e-237	3	Sertoli
2810474O19Rik	2.59966e-239	2.15093	0.492	0.057	5.00747e-235	3	Sertoli
Zmat1	1.83839e-238	3.53608	0.312	0.022	3.54111e-234	3	Sertoli
Dusp11	6.00182e-238	3.91523	0.535	0.071	1.15607e-233	3	Sertoli
Tspyl2	1.11382e-236	3.29036	0.303	0.021	2.14544e-232	3	Sertoli
Scd2	6.42304e-236	2.23008	0.553	0.07	1.23721e-231	3	Sertoli
Colgalt1	1.32328e-232	3.28143	0.348	0.028	2.54891e-228	3	Sertoli
Sh3d19	3.51791e-231	3.30628	0.258	0.015	6.77619e-227	3	Sertoli
Snhg20	7.98813e-228	3.56684	0.339	0.028	1.53867e-223	3	Sertoli
Ints6l	1.34744e-224	3.3473	0.297	0.021	2.59544e-220	3	Sertoli
Rab11fip3	1.36113e-223	3.67964	0.315	0.024	2.62181e-219	3	Sertoli
Atp1a2	5.62202e-223	2.8572	0.258	0.016	1.08291e-218	3	Sertoli
Trim26	1.09341e-220	3.41913	0.372	0.035	2.10612e-216	3	Sertoli
Sat2	3.27323e-220	3.14231	0.264	0.017	6.3049e-216	3	Sertoli
Defb19	7.60585e-220	1.86301	0.847	0.201	1.46504e-215	3	Sertoli
Clcn2	1.02868e-216	3.74322	0.3	0.023	1.98144e-212	3	Sertoli
Helz	2.82288e-215	3.57519	0.441	0.052	5.43744e-211	3	Sertoli
Dtna	6.52001e-214	3.8395	0.3	0.023	1.25588e-209	3	Sertoli
Slc47a2	4.38827e-211	2.97128	0.372	0.037	8.45269e-207	3	Sertoli
Camkk2	3.38299e-210	3.28314	0.336	0.029	6.51631e-206	3	Sertoli
Arap2	2.72304e-209	3.11536	0.267	0.018	5.24512e-205	3	Sertoli
Htatsf1	5.67606e-209	1.09856	0.607	0.101	1.09332e-204	3	Sertoli
Pdia5	4.09784e-208	3.4015	0.303	0.024	7.89326e-204	3	Sertoli
Bod1l	1.43786e-204	2.1176	0.703	0.147	2.76962e-200	3	Sertoli
Zkscan3	2.69297e-204	3.29061	0.396	0.043	5.1872e-200	3	Sertoli
Serpina5	1.09562e-196	2.10895	0.393	0.043	2.11038e-192	3	Sertoli
Psap	2.57672e-195	2.45675	0.495	0.07	4.96328e-191	3	Sertoli
Shtn1	3.76584e-195	3.46363	0.345	0.033	7.25376e-191	3	Sertoli
Hk2	4.3892e-189	3.03178	0.252	0.018	8.45448e-185	3	Sertoli
Utrn	1.02591e-188	3.63656	0.3	0.026	1.9761e-184	3	Sertoli
Man2a1	2.76436e-185	2.52118	0.339	0.034	5.3247e-181	3	Sertoli
Nisch	8.22042e-183	2.92045	0.36	0.039	1.58342e-178	3	Sertoli
Rsrp1	1.15382e-182	2.41116	0.79	0.226	2.22249e-178	3	Sertoli
Phf20l1	1.52304e-182	2.75867	0.52	0.085	2.93368e-178	3	Sertoli
8030411F24Rik	5.04093e-182	2.94314	0.3	0.027	9.70985e-178	3	Sertoli
Adgrl1	1.91636e-180	3.39681	0.258	0.02	3.69129e-176	3	Sertoli
2018-09-06	3.41798e-180	2.23079	0.351	0.037	6.58371e-176	3	Sertoli
Dock7	5.18952e-180	3.50718	0.429	0.058	9.99605e-176	3	Sertoli
Myo7a	1.58619e-179	3.46054	0.258	0.02	3.05532e-175	3	Sertoli
Gja1	7.38022e-178	2.8887	0.372	0.043	1.42158e-173	3	Sertoli
Kitl	4.60698e-177	2.71131	0.303	0.028	8.87397e-173	3	Sertoli
Susd3	4.80251e-177	1.94885	0.502	0.076	9.25059e-173	3	Sertoli
Ccnt2	6.8588e-177	3.46033	0.303	0.029	1.32114e-172	3	Sertoli
Prrc2c	1.58809e-175	2.40838	0.757	0.202	3.05897e-171	3	Sertoli
Ccdc160	1.5973e-174	3.05856	0.303	0.029	3.07672e-170	3	Sertoli
Phip	4.08885e-174	2.67338	0.447	0.064	7.87595e-170	3	Sertoli
Soat1	5.4584e-174	2.53613	0.48	0.074	1.0514e-169	3	Sertoli
Zfp950	2.5777e-173	2.75983	0.303	0.029	4.96517e-169	3	Sertoli
Ktn1	1.30283e-172	2.50595	0.378	0.045	2.5095e-168	3	Sertoli
Tcf25	5.57382e-170	2.22698	0.592	0.117	1.07363e-165	3	Sertoli
Fus	2.33627e-169	2.617	0.814	0.269	4.50012e-165	3	Sertoli
Ppt1	1.47911e-168	2.9017	0.721	0.188	2.84906e-164	3	Sertoli
Srsf10	2.4355e-166	3.43435	0.7	0.187	4.69126e-162	3	Sertoli
Trrap	7.29778e-165	3.11463	0.3	0.03	1.4057e-160	3	Sertoli
Kdm7a	4.76549e-164	2.86845	0.453	0.07	9.17928e-160	3	Sertoli
Cers5	3.61266e-163	3.45689	0.318	0.034	6.95871e-159	3	Sertoli
AC149090.1	5.17762e-163	3.36832	0.535	0.101	9.97312e-159	3	Sertoli
Galnt1	5.04689e-159	2.31078	0.318	0.034	9.72133e-155	3	Sertoli
Lgmn	4.66395e-158	2.6813	0.315	0.034	8.9837e-154	3	Sertoli
Pnisr	6.5215e-157	2.7231	0.763	0.22	1.25617e-152	3	Sertoli
Atp1a1	1.17304e-156	2.81171	0.279	0.027	2.25952e-152	3	Sertoli
Sema5b	3.27178e-156	3.65054	0.252	0.022	6.3021e-152	3	Sertoli
Clock	3.35633e-155	2.80924	0.369	0.049	6.46496e-151	3	Sertoli
Upf3b	1.92825e-151	3.57705	0.508	0.096	3.7142e-147	3	Sertoli
Cdk5	4.67647e-151	1.88666	0.318	0.036	9.00782e-147	3	Sertoli
Rbm39	8.16811e-149	2.00452	0.805	0.27	1.57334e-144	3	Sertoli
St3gal5	3.32935e-148	2.57645	0.408	0.061	6.413e-144	3	Sertoli
Clk1	1.11875e-147	2.82325	0.45	0.076	2.15494e-143	3	Sertoli
mt-Co1	4.87163e-147	2.88899	0.862	0.323	9.38374e-143	3	Sertoli
Creg1	5.71557e-144	2.46029	0.483	0.086	1.10093e-139	3	Sertoli
Mgst1	9.24788e-143	1.1623	0.489	0.085	1.78133e-138	3	Sertoli
Chka	8.90931e-142	2.38271	0.679	0.2	1.71611e-137	3	Sertoli
Trpm7	1.15857e-140	3.32833	0.405	0.063	2.23163e-136	3	Sertoli
Appl2	1.97486e-140	2.98911	0.309	0.037	3.80397e-136	3	Sertoli
Mbnl1	3.23643e-139	2.53839	0.297	0.034	6.23402e-135	3	Sertoli
Garnl3	4.69342e-137	3.02305	0.393	0.062	9.04046e-133	3	Sertoli
Arid4b	4.87218e-137	2.76124	0.628	0.165	9.38479e-133	3	Sertoli
Aard	9.13952e-136	1.34299	0.571	0.125	1.76046e-131	3	Sertoli
Kmt2c	1.52193e-134	2.78865	0.36	0.053	2.93153e-130	3	Sertoli
Pnn	3.66185e-134	1.72506	0.745	0.242	7.05345e-130	3	Sertoli
Nfx1	4.22633e-134	3.20359	0.348	0.049	8.14075e-130	3	Sertoli
Tsx	4.38826e-134	0.619199	0.429	0.072	8.45266e-130	3	Sertoli
Gpcpd1	8.90968e-133	3.14906	0.399	0.066	1.71618e-128	3	Sertoli
Abcd3	2.77995e-132	2.34023	0.288	0.034	5.35475e-128	3	Sertoli
Ormdl3	5.6296e-132	1.99656	0.444	0.081	1.08437e-127	3	Sertoli
Zcchc7	9.08407e-132	3.10414	0.574	0.143	1.74977e-127	3	Sertoli
Zdhhc20	1.43416e-130	2.71745	0.339	0.048	2.76248e-126	3	Sertoli
Defb36	9.20049e-128	1.82115	0.408	0.069	1.7722e-123	3	Sertoli
mt-Nd1	4.92176e-127	1.90596	0.928	0.462	9.48029e-123	3	Sertoli
Luc7l3	2.44085e-126	1.50978	0.643	0.178	4.70157e-122	3	Sertoli
Fam214a	3.58593e-126	3.06876	0.276	0.033	6.90721e-122	3	Sertoli
Fyn	5.80949e-126	2.27034	0.252	0.027	1.11902e-121	3	Sertoli
mt-Nd5	7.22323e-126	1.47504	0.778	0.272	1.39134e-121	3	Sertoli
Myo6	4.58208e-125	2.29211	0.306	0.04	8.826e-121	3	Sertoli
Mfge8	3.30653e-124	3.10493	0.294	0.037	6.36904e-120	3	Sertoli
Espn	4.45177e-124	2.8314	0.285	0.035	8.57499e-120	3	Sertoli
Ppp1r12a	1.30019e-123	1.93074	0.571	0.146	2.50443e-119	3	Sertoli
Stim1	7.95634e-123	2.04777	0.601	0.164	1.53255e-118	3	Sertoli
Slc4a7	2.5994e-120	2.48749	0.417	0.078	5.00697e-116	3	Sertoli
mt-Cytb	3.62854e-118	1.7575	0.91	0.429	6.98929e-114	3	Sertoli
Add1	5.08029e-118	2.71879	0.261	0.031	9.78565e-114	3	Sertoli
Mef2a	8.07344e-118	1.77461	0.441	0.088	1.55511e-113	3	Sertoli
Zc3h13	2.22238e-117	1.39382	0.495	0.108	4.28075e-113	3	Sertoli
Zeb2	3.30053e-117	1.10808	0.252	0.029	6.35748e-113	3	Sertoli
Zbtb20	4.35569e-116	1.79607	0.402	0.073	8.38994e-112	3	Sertoli
Creb3	6.6829e-115	2.39557	0.342	0.055	1.28726e-110	3	Sertoli
mt-Rnr2	7.85555e-114	1.12738	1	0.92	1.51314e-109	3	Sertoli
Gstm6	1.16101e-113	1.93276	0.321	0.048	2.23635e-109	3	Sertoli
Cd2ap	8.33868e-113	1.30134	0.444	0.091	1.6062e-108	3	Sertoli
mt-Nd4	8.85603e-112	1.62385	0.835	0.357	1.70585e-107	3	Sertoli
Npr1	1.88765e-111	2.57709	0.318	0.049	3.63599e-107	3	Sertoli
Sptbn1	2.99084e-110	1.24399	0.462	0.101	5.76096e-106	3	Sertoli
Anapc5	2.16322e-109	2.06882	0.459	0.1	4.1668e-105	3	Sertoli
Laptm4b	2.72257e-109	2.29248	0.462	0.104	5.24421e-105	3	Sertoli
Hmg20b	9.44591e-108	1.31078	0.36	0.063	1.81947e-103	3	Sertoli
mt-Nd2	8.63252e-107	1.58816	0.781	0.31	1.6628e-102	3	Sertoli
Kmt2a	2.4052e-105	2.05988	0.315	0.049	4.63289e-101	3	Sertoli
Mycbp2	8.16798e-104	1.92526	0.685	0.254	1.57332e-99	3	Sertoli
Cd81	1.21316e-103	1.2881	0.42	0.084	2.33679e-99	3	Sertoli
Gm2a	1.18708e-102	2.12256	0.598	0.188	2.28655e-98	3	Sertoli
App	1.42251e-101	2.06946	0.517	0.136	2.74003e-97	3	Sertoli
Celf2	1.61383e-101	1.73751	0.327	0.055	3.10856e-97	3	Sertoli
Slmap	1.71088e-101	2.13259	0.477	0.117	3.29549e-97	3	Sertoli
Ldhb	3.00738e-101	0.970953	0.471	0.109	5.79282e-97	3	Sertoli
Fbxo21	3.83668e-100	2.36196	0.27	0.038	7.39021e-96	3	Sertoli
Rif1	4.26193e-100	1.68651	0.673	0.24	8.20933e-96	3	Sertoli
Nfkbia	3.34149e-98	1.84961	0.261	0.036	6.43637e-94	3	Sertoli
Tacc1	1.3679e-97	1.32024	0.474	0.117	2.63485e-93	3	Sertoli
Man2a2	3.04319e-95	3.09397	0.279	0.043	5.8618e-91	3	Sertoli
Nedd4	3.94322e-95	1.35781	0.399	0.083	7.59544e-91	3	Sertoli
Dnm3	1.49975e-94	3.01815	0.342	0.065	2.88882e-90	3	Sertoli
Kif5b	1.15874e-93	1.29934	0.456	0.113	2.23197e-89	3	Sertoli
Dhrs7	7.47395e-93	1.35667	0.273	0.041	1.43963e-88	3	Sertoli
Hp1bp3	2.56117e-92	1.18958	0.441	0.106	4.93332e-88	3	Sertoli
Mpzl1	3.06369e-92	2.72405	0.267	0.041	5.90128e-88	3	Sertoli
Arglu1	3.26221e-92	1.79295	0.634	0.235	6.28367e-88	3	Sertoli
Apc	6.30713e-92	1.91712	0.318	0.057	1.21488e-87	3	Sertoli
Xpo1	9.1696e-92	2.03305	0.387	0.084	1.76625e-87	3	Sertoli
Chd6	1.70926e-89	1.94144	0.321	0.059	3.29238e-85	3	Sertoli
Mbnl2	2.26e-89	1.77754	0.261	0.04	4.35321e-85	3	Sertoli
Arid4a	2.91517e-89	3.08733	0.453	0.119	5.61519e-85	3	Sertoli
Arid5b	3.39807e-89	2.19817	0.258	0.039	6.54537e-85	3	Sertoli
Folr1	7.24577e-88	1.25211	0.282	0.045	1.39568e-83	3	Sertoli
Scarb1	1.18856e-87	2.15572	0.399	0.093	2.2894e-83	3	Sertoli
Golgb1	3.40392e-87	1.776	0.628	0.234	6.55663e-83	3	Sertoli
Kansl3	4.68953e-87	2.75479	0.402	0.096	9.03298e-83	3	Sertoli
Hnrnpa2b1	2.92357e-86	1.29698	0.811	0.389	5.63137e-82	3	Sertoli
Syap1	4.90168e-86	1.9222	0.327	0.063	9.44163e-82	3	Sertoli
Trmt1l	1.69816e-84	2.45618	0.318	0.062	3.271e-80	3	Sertoli
Map7d3	1.72184e-84	2.14153	0.351	0.075	3.31661e-80	3	Sertoli
Son	1.99569e-83	1.77826	0.733	0.354	3.8441e-79	3	Sertoli
Tmem50a	5.86252e-82	1.63934	0.345	0.072	1.12924e-77	3	Sertoli
Tmem87b	1.01162e-81	2.29292	0.267	0.045	1.94857e-77	3	Sertoli
Tbl1x	1.13369e-81	2.58044	0.255	0.041	2.18371e-77	3	Sertoli
Tardbp	1.25141e-81	1.88087	0.523	0.167	2.41046e-77	3	Sertoli
Zfp445	2.23155e-81	2.30181	0.357	0.079	4.29842e-77	3	Sertoli
Spock2	6.70629e-81	1.61893	0.354	0.078	1.29176e-76	3	Sertoli
Timp2	8.18608e-81	0.774423	0.483	0.134	1.5768e-76	3	Sertoli
Ppp2r3a	3.92729e-80	2.08714	0.267	0.045	7.56474e-76	3	Sertoli
4933402E13Rik	1.2946e-79	1.46384	0.252	0.04	2.49366e-75	3	Sertoli
Ttc14	8.21329e-79	1.78615	0.441	0.123	1.58204e-74	3	Sertoli
Ddx17	1.36693e-78	2.10927	0.459	0.134	2.63297e-74	3	Sertoli
Strn3	1.63337e-78	1.44696	0.363	0.084	3.1462e-74	3	Sertoli
Prpf39	2.86272e-77	1.78967	0.279	0.051	5.51417e-73	3	Sertoli
Cpsf6	3.09843e-77	1.64127	0.318	0.066	5.9682e-73	3	Sertoli
mt-Rnr1	4.95552e-77	2.09498	0.679	0.265	9.54533e-73	3	Sertoli
Derl3	1.15928e-76	2.98505	0.252	0.043	2.233e-72	3	Sertoli
Eppin	1.36942e-75	2.43213	0.312	0.065	2.63778e-71	3	Sertoli
Sfpq	4.06343e-75	1.64515	0.526	0.181	7.82697e-71	3	Sertoli
Rbm26	6.74237e-75	1.83694	0.529	0.183	1.29872e-70	3	Sertoli
Zfc3h1	8.27115e-74	2.65898	0.369	0.092	1.59319e-69	3	Sertoli
Miip	1.95677e-73	2.34505	0.297	0.061	3.76913e-69	3	Sertoli
Atxn2	1.95784e-73	2.43423	0.363	0.089	3.77119e-69	3	Sertoli
Fubp1	5.11865e-73	1.87627	0.535	0.184	9.85954e-69	3	Sertoli
Itm2c	5.55043e-73	2.00571	0.294	0.059	1.06912e-68	3	Sertoli
Cd151	1.46971e-71	1.49244	0.318	0.069	2.83096e-67	3	Sertoli
Appl1	6.51271e-71	2.27224	0.336	0.078	1.25448e-66	3	Sertoli
Mmd2	7.41505e-71	1.68179	0.252	0.045	1.42829e-66	3	Sertoli
Cadm1	3.14534e-69	1.81652	0.502	0.173	6.05856e-65	3	Sertoli
Akr1b8	3.65797e-69	1.39038	0.3	0.063	7.04599e-65	3	Sertoli
Tnrc6a	6.48721e-69	1.58839	0.333	0.078	1.24957e-64	3	Sertoli
Epb41l3	1.18042e-68	1.23403	0.321	0.072	2.27373e-64	3	Sertoli
Huwe1	4.75485e-68	2.01707	0.288	0.059	9.15879e-64	3	Sertoli
Marcks	1.09175e-66	0.693728	0.255	0.048	2.10292e-62	3	Sertoli
Zfp711	2.4685e-66	2.01549	0.297	0.066	4.75482e-62	3	Sertoli
Akr1b3	2.40314e-65	1.65018	0.393	0.111	4.62894e-61	3	Sertoli
Nmt2	3.07569e-65	1.25093	0.456	0.139	5.92438e-61	3	Sertoli
Etnk1	3.42022e-65	1.81217	0.495	0.179	6.58802e-61	3	Sertoli
4930447C04Rik	4.30222e-65	0.989805	0.378	0.099	8.28694e-61	3	Sertoli
Ubtf	7.63317e-65	2.12892	0.279	0.058	1.4703e-60	3	Sertoli
Atp2b4	2.11238e-64	2.04008	0.306	0.071	4.06887e-60	3	Sertoli
Snrnp70	2.58784e-64	1.28553	0.601	0.258	4.98469e-60	3	Sertoli
Gstm7	5.04725e-64	1.0259	0.261	0.052	9.72201e-60	3	Sertoli
Pgap2	5.86893e-64	1.34451	0.384	0.106	1.13047e-59	3	Sertoli
Ninl	5.06044e-63	2.16226	0.363	0.099	9.74742e-59	3	Sertoli
Prpf38b	1.62693e-62	1.35024	0.598	0.263	3.1338e-58	3	Sertoli
Las1l	3.1535e-62	1.21536	0.255	0.051	6.07426e-58	3	Sertoli
Itgb1	6.8734e-62	1.52644	0.309	0.072	1.32395e-57	3	Sertoli
Cd302	8.85457e-62	0.937711	0.261	0.053	1.70557e-57	3	Sertoli
Serinc1	1.15547e-61	1.89711	0.3	0.069	2.22567e-57	3	Sertoli
Ncoa7	2.32684e-61	2.56532	0.252	0.051	4.48196e-57	3	Sertoli
Arpc1b	3.75556e-61	0.821825	0.3	0.07	7.23396e-57	3	Sertoli
Eid1	1.03721e-60	2.17149	0.252	0.051	1.99788e-56	3	Sertoli
Rbm25	1.41551e-60	1.17109	0.763	0.441	2.72655e-56	3	Sertoli
H2-D1	1.79564e-59	0.782526	0.279	0.062	3.45876e-55	3	Sertoli
Atp11b	2.3395e-59	2.65529	0.306	0.075	4.50634e-55	3	Sertoli
Haus7	3.45591e-59	1.33833	0.282	0.064	6.65677e-55	3	Sertoli
Rbm5	5.70997e-59	1.32967	0.505	0.192	1.09985e-54	3	Sertoli
Gsta4	5.93482e-59	0.697941	0.357	0.097	1.14317e-54	3	Sertoli
Cdc37l1	1.43637e-58	2.03336	0.526	0.212	2.76674e-54	3	Sertoli
Bclaf1	2.75946e-58	1.1893	0.517	0.199	5.31527e-54	3	Sertoli
Lpin2	3.2021e-58	2.25231	0.327	0.086	6.16788e-54	3	Sertoli
Atp6v0e	1.41784e-57	1.44524	0.399	0.128	2.73104e-53	3	Sertoli
Zmynd11	3.27903e-57	1.33471	0.288	0.069	6.31607e-53	3	Sertoli
Akap9	5.65416e-57	1.79219	0.465	0.169	1.0891e-52	3	Sertoli
Krit1	6.25432e-57	1.4709	0.315	0.082	1.20471e-52	3	Sertoli
Prkra	1.52981e-56	1.91926	0.279	0.065	2.94673e-52	3	Sertoli
Ankrd11	2.55817e-56	1.26113	0.489	0.187	4.92756e-52	3	Sertoli
Srek1	3.81007e-56	1.10567	0.462	0.165	7.33897e-52	3	Sertoli
Top1	5.08518e-56	0.655238	0.492	0.186	9.79508e-52	3	Sertoli
Slf2	1.32442e-55	2.18963	0.309	0.08	2.5511e-51	3	Sertoli
Vim	1.45026e-55	0.832611	0.27	0.061	2.79349e-51	3	Sertoli
Mrps5	2.51967e-55	1.45816	0.33	0.092	4.85339e-51	3	Sertoli
Birc2	7.67456e-55	1.85431	0.393	0.129	1.47827e-50	3	Sertoli
Dst	8.61407e-55	2.90788	0.426	0.149	1.65924e-50	3	Sertoli
Cyth3	3.53135e-54	0.822071	0.261	0.059	6.80208e-50	3	Sertoli
Tpm3	6.3458e-54	1.9138	0.405	0.13	1.22233e-49	3	Sertoli
Ctage5	2.53895e-53	1.35422	0.384	0.121	4.89052e-49	3	Sertoli
Hacd3	1.6456e-52	1.96187	0.315	0.087	3.16975e-48	3	Sertoli
Mgarp	2.46211e-52	1.06311	0.252	0.056	4.74251e-48	3	Sertoli
Slc3a2	3.92641e-52	0.802794	0.396	0.126	7.56305e-48	3	Sertoli
Glg1	5.78483e-52	1.19646	0.279	0.069	1.11427e-47	3	Sertoli
Adipor1	7.39801e-52	1.58562	0.438	0.159	1.42501e-47	3	Sertoli
Ubn2	2.03411e-51	2.24027	0.45	0.173	3.91809e-47	3	Sertoli
Chd1	3.96103e-51	1.68931	0.366	0.117	7.62974e-47	3	Sertoli
Reep2	8.25455e-51	1.50914	0.339	0.101	1.58999e-46	3	Sertoli
Tapbp	3.61429e-50	1.04887	0.291	0.078	6.96185e-46	3	Sertoli
Aplp2	6.36185e-50	0.757761	0.508	0.212	1.22542e-45	3	Sertoli
Ccnl1	9.61449e-50	1.83673	0.444	0.173	1.85194e-45	3	Sertoli
Gnas	2.12431e-49	0.880336	0.462	0.165	4.09185e-45	3	Sertoli
Srrm1	6.79495e-49	0.912944	0.529	0.228	1.30884e-44	3	Sertoli
Chd8	1.21106e-48	1.93008	0.258	0.064	2.33274e-44	3	Sertoli
Ppib	2.17478e-48	1.06132	0.399	0.135	4.18906e-44	3	Sertoli
Slc25a4	4.49614e-48	0.461077	0.315	0.086	8.66047e-44	3	Sertoli
Zc3h7a	6.58462e-48	1.48704	0.351	0.112	1.26833e-43	3	Sertoli
Ppp1r12c	6.94737e-48	2.46785	0.27	0.071	1.3382e-43	3	Sertoli
Nfe2l1	7.45805e-48	1.3056	0.309	0.088	1.43657e-43	3	Sertoli
Scaf11	3.32363e-47	1.08901	0.297	0.081	6.40197e-43	3	Sertoli
Itch	5.10861e-46	1.86612	0.252	0.064	9.84021e-42	3	Sertoli
Jak1	4.47431e-45	1.28112	0.273	0.072	8.61841e-41	3	Sertoli
Luc7l	1.88736e-44	1.88402	0.318	0.097	3.63544e-40	3	Sertoli
Ddx42	4.0653e-44	1.11371	0.441	0.175	7.83058e-40	3	Sertoli
Lman1	5.30514e-44	1.56308	0.303	0.088	1.02188e-39	3	Sertoli
2018-03-02	1.04615e-43	1.3392	0.285	0.081	2.0151e-39	3	Sertoli
Asxl2	1.78081e-43	2.06131	0.297	0.088	3.43021e-39	3	Sertoli
Uimc1	2.56011e-43	0.944179	0.306	0.092	4.93128e-39	3	Sertoli
Spag9	5.31793e-43	1.48882	0.402	0.155	1.02434e-38	3	Sertoli
Prdx2	4.3918e-42	1.32889	0.324	0.103	8.45948e-38	3	Sertoli
Pkn2	8.75046e-42	1.95892	0.399	0.156	1.68551e-37	3	Sertoli
Srsf5	2.54719e-41	1.65175	0.438	0.186	4.9064e-37	3	Sertoli
Ssb	4.42889e-41	0.752062	0.489	0.198	8.53093e-37	3	Sertoli
Ash1l	1.62527e-40	0.771787	0.363	0.132	3.13059e-36	3	Sertoli
Zfp326	2.22673e-40	1.81949	0.327	0.112	4.28913e-36	3	Sertoli
Mark3	2.35601e-40	1.80561	0.303	0.097	4.53814e-36	3	Sertoli
Ivns1abp	3.73201e-39	1.48374	0.402	0.164	7.1886e-35	3	Sertoli
Rnf20	4.63386e-39	0.492553	0.267	0.077	8.92573e-35	3	Sertoli
Nktr	6.86112e-39	0.9435	0.628	0.364	1.32159e-34	3	Sertoli
Sec62	1.6323e-38	0.888603	0.405	0.163	3.14414e-34	3	Sertoli
Herc2	3.47249e-38	1.37189	0.354	0.131	6.6887e-34	3	Sertoli
Prpf4b	8.15682e-38	1.33315	0.366	0.141	1.57117e-33	3	Sertoli
Brwd1	2.8864e-37	1.53346	0.312	0.108	5.55978e-33	3	Sertoli
Psma7	3.02205e-37	0.456538	0.414	0.163	5.82107e-33	3	Sertoli
Srpk2	3.03982e-37	0.99308	0.709	0.476	5.85531e-33	3	Sertoli
Srsf2	5.67533e-37	1.26569	0.486	0.234	1.09318e-32	3	Sertoli
Cwf19l2	8.61654e-37	0.804471	0.252	0.074	1.65972e-32	3	Sertoli
Wnk1	2.1106e-36	1.94054	0.45	0.209	4.06543e-32	3	Sertoli
Aldh2	2.43632e-36	0.322981	0.267	0.076	4.69283e-32	3	Sertoli
Tcf4	1.57321e-35	1.60515	0.285	0.093	3.03031e-31	3	Sertoli
Fbxo34	3.59039e-35	1.51712	0.315	0.113	6.91581e-31	3	Sertoli
Hnrnpr	8.03806e-35	1.35071	0.417	0.184	1.54829e-30	3	Sertoli
Hsp90b1	1.64812e-34	0.457231	0.874	0.583	3.17461e-30	3	Sertoli
Mapk9	1.77722e-34	1.44825	0.285	0.095	3.42327e-30	3	Sertoli
Agtrap	1.88246e-34	1.03212	0.273	0.09	3.62599e-30	3	Sertoli
Nsd1	1.88427e-34	1.06079	0.3	0.103	3.62947e-30	3	Sertoli
Chd4	2.00125e-34	1.02772	0.613	0.365	3.8548e-30	3	Sertoli
AI314180	2.07373e-34	1.71645	0.261	0.082	3.99441e-30	3	Sertoli
Enah	2.74662e-34	1.27146	0.396	0.167	5.29054e-30	3	Sertoli
Crebrf	3.36835e-34	0.561408	0.354	0.14	6.48811e-30	3	Sertoli
Acin1	5.71441e-34	0.646986	0.613	0.364	1.10071e-29	3	Sertoli
Tsc22d1	1.08853e-33	0.38782	0.474	0.229	2.09673e-29	3	Sertoli
Itm2b	1.80644e-33	0.657153	0.604	0.366	3.47956e-29	3	Sertoli
Arpc5	2.70078e-33	0.410226	0.276	0.09	5.20225e-29	3	Sertoli
4833420G17Rik	2.89957e-33	2.40392	0.258	0.083	5.58516e-29	3	Sertoli
Lrpap1	3.4916e-33	1.40366	0.351	0.139	6.72552e-29	3	Sertoli
Tceal9	7.78794e-33	0.692029	0.261	0.082	1.50011e-28	3	Sertoli
Map4	9.27181e-33	1.42384	0.357	0.146	1.78594e-28	3	Sertoli
Paxbp1	1.10024e-32	1.29825	0.291	0.103	2.11928e-28	3	Sertoli
Marcksl1	5.57683e-32	0.540829	0.276	0.091	1.07421e-27	3	Sertoli
H2-K1	1.03222e-31	0.580918	0.387	0.164	1.98827e-27	3	Sertoli
Dnm1l	1.10491e-31	1.07116	0.408	0.184	2.12827e-27	3	Sertoli
Srrm2	2.03172e-31	0.4885	0.559	0.304	3.91351e-27	3	Sertoli
Safb2	2.45046e-31	2.72886	0.369	0.159	4.72008e-27	3	Sertoli
Nemf	2.69857e-31	1.97022	0.438	0.216	5.19799e-27	3	Sertoli
Ddx50	5.00602e-31	1.24461	0.336	0.136	9.6426e-27	3	Sertoli
Ccnl2	9.39773e-31	1.80904	0.303	0.114	1.81019e-26	3	Sertoli
Luc7l2	6.47382e-30	0.688738	0.48	0.245	1.24699e-25	3	Sertoli
Mapre1	6.57952e-30	0.754944	0.333	0.134	1.26735e-25	3	Sertoli
Chchd10	6.63925e-30	0.95968	0.348	0.144	1.27885e-25	3	Sertoli
Anapc15	9.17718e-30	1.92468	0.267	0.094	1.76771e-25	3	Sertoli
Zfp638	9.19037e-30	1.1358	0.333	0.135	1.77025e-25	3	Sertoli
Rock2	1.17175e-29	2.34125	0.279	0.098	2.25703e-25	3	Sertoli
Setd5	2.72957e-29	1.45925	0.273	0.097	5.2577e-25	3	Sertoli
Kmt2e	6.30699e-29	0.69727	0.366	0.16	1.21485e-24	3	Sertoli
Mier3	1.48557e-28	1.01246	0.276	0.103	2.86151e-24	3	Sertoli
Arl6ip1	1.83954e-28	0.367666	0.622	0.355	3.54333e-24	3	Sertoli
Rrbp1	1.99161e-28	0.945177	0.526	0.296	3.83624e-24	3	Sertoli
Hnrnpl	2.13944e-28	2.24137	0.261	0.093	4.12099e-24	3	Sertoli
Cdk12	3.60638e-28	0.746471	0.315	0.127	6.9466e-24	3	Sertoli
Srsf11	6.53637e-28	0.851185	0.535	0.307	1.25904e-23	3	Sertoli
Taf1d	7.9677e-28	1.59063	0.33	0.136	1.53474e-23	3	Sertoli
Fuca1	1.07195e-27	1.09707	0.375	0.172	2.06479e-23	3	Sertoli
Serinc3	1.30878e-27	0.271681	0.429	0.205	2.52097e-23	3	Sertoli
Tgoln1	8.01678e-27	1.05872	0.297	0.119	1.54419e-22	3	Sertoli
Smarca2	2.14178e-26	0.809778	0.526	0.309	4.1255e-22	3	Sertoli
Afdn	1.50283e-25	0.725764	0.276	0.107	2.89475e-21	3	Sertoli
Elovl2	2.84543e-25	1.53513	0.354	0.163	5.48087e-21	3	Sertoli
Tmed3	3.80286e-25	0.678899	0.273	0.104	7.32507e-21	3	Sertoli
Sin3b	4.8045e-25	0.644673	0.568	0.37	9.25443e-21	3	Sertoli
Cd63	5.27176e-25	2.98252	0.306	0.132	1.01545e-20	3	Sertoli
Rab14	7.3413e-25	0.827631	0.357	0.164	1.41408e-20	3	Sertoli
Zranb2	7.36104e-25	0.88205	0.495	0.295	1.41788e-20	3	Sertoli
Calr	1.42862e-24	0.258929	0.718	0.493	2.7518e-20	3	Sertoli
Anxa2	1.60528e-24	0.678315	0.279	0.112	3.09209e-20	3	Sertoli
Dhx9	1.94469e-24	0.638611	0.327	0.145	3.74585e-20	3	Sertoli
Epb41l2	2.32595e-24	0.940948	0.405	0.201	4.48024e-20	3	Sertoli
Syncrip	2.38915e-23	0.824303	0.276	0.111	4.60197e-19	3	Sertoli
Atp6v0b	7.60918e-23	0.63096	0.273	0.11	1.46568e-18	3	Sertoli
Lamp2	1.31602e-22	0.60799	0.279	0.113	2.53491e-18	3	Sertoli
Taok1	3.15635e-22	0.817411	0.267	0.109	6.07975e-18	3	Sertoli
Zmym5	4.98737e-22	0.853174	0.294	0.128	9.60666e-18	3	Sertoli
Mrps17	1.14888e-21	1.32406	0.279	0.12	2.21298e-17	3	Sertoli
Bptf	1.53232e-21	1.09724	0.318	0.149	2.95155e-17	3	Sertoli
Bnip2	2.27577e-21	0.503088	0.3	0.135	4.38358e-17	3	Sertoli
Nufip2	3.45351e-21	1.56458	0.288	0.128	6.65216e-17	3	Sertoli
Ywhab	1.20158e-20	0.502241	0.324	0.152	2.31449e-16	3	Sertoli
Npc2	2.20745e-20	1.47377	0.333	0.165	4.252e-16	3	Sertoli
Smg1	2.2948e-20	0.844158	0.288	0.13	4.42024e-16	3	Sertoli
Hacd2	2.52316e-20	0.862155	0.432	0.251	4.86011e-16	3	Sertoli
Clcn3	2.60701e-20	1.30249	0.261	0.112	5.02163e-16	3	Sertoli
Fam135a	3.212e-20	1.43886	0.279	0.127	6.18696e-16	3	Sertoli
Swt1	7.19839e-20	1.70638	0.291	0.134	1.38655e-15	3	Sertoli
Hnrnph1	7.28827e-20	0.99098	0.405	0.224	1.40387e-15	3	Sertoli
U2surp	7.4006e-20	0.812951	0.327	0.157	1.4255e-15	3	Sertoli
Thrap3	1.48422e-19	0.608559	0.336	0.167	2.85891e-15	3	Sertoli
Ptp4a2	2.27949e-19	0.543791	0.333	0.168	4.39076e-15	3	Sertoli
2018-03-02	2.4424e-19	1.75211	0.255	0.111	4.70455e-15	3	Sertoli
Suco	3.99282e-19	0.800701	0.483	0.295	7.69097e-15	3	Sertoli
Sf3b1	4.85937e-19	0.504109	0.508	0.317	9.36013e-15	3	Sertoli
Isyna1	6.06904e-19	0.722592	0.483	0.313	1.16902e-14	3	Sertoli
Zfand5	1.61063e-18	0.830516	0.294	0.141	3.10239e-14	3	Sertoli
Bbx	2.0245e-18	0.551009	0.453	0.26	3.89958e-14	3	Sertoli
Fam213a	2.50336e-18	0.936943	0.399	0.228	4.82196e-14	3	Sertoli
Sec63	2.7646e-18	0.733207	0.327	0.167	5.32518e-14	3	Sertoli
Irak1bp1	7.0892e-18	0.803752	0.042	0.251	1.36552e-13	3	Sertoli
Itsn2	1.97751e-17	1.01552	0.276	0.129	3.80908e-13	3	Sertoli
Sdf4	2.43558e-17	0.82486	0.39	0.226	4.69141e-13	3	Sertoli
Eps15	2.9383e-17	0.419159	0.264	0.121	5.65975e-13	3	Sertoli
G3bp2	4.94494e-17	0.724453	0.378	0.216	9.52494e-13	3	Sertoli
Impa1	5.4467e-17	0.41054	0.258	0.118	1.04914e-12	3	Sertoli
Ythdc1	5.54589e-17	0.992237	0.375	0.215	1.06825e-12	3	Sertoli
Iws1	9.20153e-17	0.888947	0.348	0.188	1.7724e-12	3	Sertoli
Zfp644	1.05101e-16	0.956566	0.321	0.17	2.02446e-12	3	Sertoli
Appbp2	1.89884e-16	0.853635	0.288	0.144	3.65755e-12	3	Sertoli
Fnbp4	4.15392e-16	0.838356	0.258	0.123	8.00129e-12	3	Sertoli
Larp4b	7.03152e-16	0.822085	0.252	0.119	1.35441e-11	3	Sertoli
Vps37a	1.01748e-15	0.613526	0.294	0.152	1.95987e-11	3	Sertoli
Golga4	1.07985e-15	0.717453	0.592	0.436	2.08e-11	3	Sertoli
Qk	1.18211e-15	0.845342	0.315	0.165	2.27697e-11	3	Sertoli
Pcnt	1.26694e-15	1.07787	0.258	0.126	2.44038e-11	3	Sertoli
Psmd7	5.90415e-15	0.426409	0.408	0.254	1.13726e-10	3	Sertoli
Map7	6.4447e-15	0.775206	0.384	0.225	1.24138e-10	3	Sertoli
Tmed10	8.81928e-15	0.820267	0.333	0.188	1.69877e-10	3	Sertoli
Zfr	1.22453e-14	0.585141	0.474	0.321	2.3587e-10	3	Sertoli
Hspa8	1.51199e-14	0.282047	0.276	0.135	2.9124e-10	3	Sertoli
Brd8	2.27424e-14	0.413217	0.294	0.157	4.38065e-10	3	Sertoli
Msi2	2.34253e-14	0.814052	0.267	0.135	4.51218e-10	3	Sertoli
Rbbp6	3.27912e-14	0.851752	0.495	0.351	6.31625e-10	3	Sertoli
Tpr	4.47791e-14	0.266944	0.432	0.265	8.62536e-10	3	Sertoli
Cdc42	4.48346e-14	0.766562	0.279	0.145	8.63604e-10	3	Sertoli
Tmem234	4.83448e-14	0.537147	0.285	0.15	9.31217e-10	3	Sertoli
Xrn2	9.23145e-14	0.934494	0.372	0.228	1.77816e-09	3	Sertoli
Ssr2	9.53175e-14	0.681222	0.318	0.178	1.83601e-09	3	Sertoli
Cbx1	2.47138e-13	0.321897	0.315	0.17	4.76037e-09	3	Sertoli
Tmem59	3.41331e-13	0.573733	0.279	0.149	6.57471e-09	3	Sertoli
2018-03-07	4.26045e-13	1.21829	0.27	0.143	8.20648e-09	3	Sertoli
Sec61a1	3.86003e-12	0.917581	0.255	0.137	7.4352e-08	3	Sertoli
Ctr9	5.38583e-12	0.366363	0.327	0.196	1.03742e-07	3	Sertoli
Pdia3	1.20128e-11	0.523071	0.495	0.364	2.3139e-07	3	Sertoli
Add3	1.42502e-11	0.38701	0.282	0.159	2.74488e-07	3	Sertoli
Tm9sf3	1.47197e-11	0.574744	0.294	0.171	2.83532e-07	3	Sertoli
Slc39a6	1.89654e-11	0.848897	0.291	0.17	3.65312e-07	3	Sertoli
Ppp3ca	2.06066e-11	0.399708	0.363	0.23	3.96925e-07	3	Sertoli
Smarcc2	2.07711e-11	2.39159	0.285	0.167	4.00092e-07	3	Sertoli
Usp34	9.07877e-11	0.478223	0.414	0.284	1.74875e-06	3	Sertoli
Dnajc7	1.66467e-10	0.294626	0.39	0.266	3.20648e-06	3	Sertoli
Dhx15	3.60552e-10	0.753961	0.261	0.153	6.94495e-06	3	Sertoli
Mlec	5.76228e-10	0.602741	0.345	0.23	1.10993e-05	3	Sertoli
Trip11	6.14998e-10	0.48058	0.267	0.155	1.18461e-05	3	Sertoli
Med21	1.1705e-09	0.517482	0.264	0.156	2.25461e-05	3	Sertoli
BC005537	1.56264e-09	0.597364	0.324	0.21	3.00995e-05	3	Sertoli
Hnrnpdl	1.58684e-09	0.390865	0.282	0.167	3.05658e-05	3	Sertoli
Dync1i2	2.48057e-09	0.723146	0.411	0.295	4.77808e-05	3	Sertoli
Ncor1	2.59466e-09	0.812123	0.345	0.235	4.99783e-05	3	Sertoli
Med19	2.82509e-09	0.611026	0.258	0.151	5.4417e-05	3	Sertoli
Tcerg1	3.30661e-09	0.555065	0.261	0.155	6.36919e-05	3	Sertoli
Ccar1	4.40486e-09	0.342013	0.39	0.27	8.48464e-05	3	Sertoli
Mesd	5.63008e-09	0.626726	0.303	0.194	0.000108447	3	Sertoli
Rsrc2	7.12093e-09	0.311921	0.342	0.234	0.000137163	3	Sertoli
BC005561	7.93263e-09	0.603954	0.264	0.164	0.000152798	3	Sertoli
Ube3a	7.98835e-09	0.552288	0.33	0.22	0.000153872	3	Sertoli
Tiprl	1.0791e-08	0.521607	0.114	0.261	0.000207857	3	Sertoli
Tmbim6	1.10517e-08	0.595391	0.369	0.268	0.000212878	3	Sertoli
Canx	1.3683e-08	0.272685	0.435	0.306	0.000263561	3	Sertoli
Mgea5	2.50389e-08	0.274723	0.255	0.155	0.000482298	3	Sertoli
Wdr26	3.13459e-08	0.516241	0.297	0.195	0.000603786	3	Sertoli
Rtf1	3.35049e-08	0.36153	0.336	0.239	0.000645371	3	Sertoli
Safb	3.81709e-08	0.402323	0.273	0.171	0.000735248	3	Sertoli
Supt5	6.70628e-08	0.52292	0.306	0.203	0.00129176	3	Sertoli
Dbi	1.18605e-07	0.527975	0.321	0.216	0.00228457	3	Sertoli
Chchd2	2.39504e-07	0.467593	0.505	0.422	0.00461332	3	Sertoli
Tmem30a	3.60416e-07	0.344753	0.297	0.203	0.00694233	3	Sertoli
Tra2a	9.49174e-07	0.364526	0.315	0.221	0.018283	3	Sertoli
Baz2b	1.34019e-06	0.391026	0.318	0.23	0.0258147	3	Sertoli
Eif4g1	2.14742e-06	0.292341	0.306	0.208	0.0413636	3	Sertoli
2610507B11Rik	2.75678e-06	0.385323	0.324	0.239	0.0531011	3	Sertoli
Ddx24	4.27204e-06	0.322849	0.369	0.28	0.0822881	3	Sertoli
Ubac2	7.47742e-06	0.954644	0.252	0.173	0.14403	3	Sertoli
Serf2	9.88064e-06	0.458242	0.327	0.251	0.190321	3	Sertoli
Cspp1	1.06535e-05	0.74482	0.306	0.229	0.205208	3	Sertoli
Thoc1	1.14827e-05	0.395232	0.264	0.186	0.22118	3	Sertoli
Tra2b	1.33278e-05	0.411291	0.294	0.215	0.25672	3	Sertoli
Mxd4	3.74223e-05	0.466234	0.291	0.215	0.720828	3	Sertoli
Hnrnpa3	5.99895e-05	0.310779	0.297	0.218	1	3	Sertoli
Gas5	6.40465e-05	0.485084	0.255	0.188	1	3	Sertoli
Dcaf8	7.43639e-05	0.578709	0.288	0.215	1	3	Sertoli
Erp29	0.000231502	0.513211	0.372	0.313	1	3	Sertoli
Becn1	0.000293583	0.306295	0.255	0.19	1	3	Sertoli
Smg6	0.000559307	0.589995	0.258	0.202	1	3	Sertoli
Gigyf2	0.000792308	0.284747	0.279	0.222	1	3	Sertoli
Ddhd1	0.00139438	0.564999	0.258	0.204	1	3	Sertoli
Papola	0.00328996	0.275854	0.327	0.276	1	3	Sertoli
Saraf	0.00550426	0.377374	0.297	0.247	1	3	Sertoli
Tmbim4	0.00608131	0.291476	0.345	0.308	1	3	Sertoli
Mt3	0	4.10206	0.294	0.004	0	4	Leydig
Gstm1	0	4.04321	0.988	0.173	0	4	Leydig
Paqr6	0	4.02365	0.29	0.003	0	4	Leydig
Insl3	0	3.97391	0.996	0.151	0	4	Leydig
Hsd3b6	0	3.9718	0.952	0.066	0	4	Leydig
Gstm2-ps1	0	3.92818	0.532	0.007	0	4	Leydig
Adh1	0	3.79557	0.655	0.013	0	4	Leydig
Aldh3a1	0	3.79447	0.266	0.004	0	4	Leydig
Fabp3-ps1	0	3.72214	0.742	0.013	0	4	Leydig
Thrsp	0	3.71503	0.329	0.008	0	4	Leydig
Gm44386	0	3.70649	0.262	0.004	0	4	Leydig
S100a16	0	3.70111	0.317	0.003	0	4	Leydig
Ass1	0	3.69594	0.881	0.02	0	4	Leydig
Fuom	0	3.68589	0.262	0.003	0	4	Leydig
Fabp3	0	3.65213	0.98	0.092	0	4	Leydig
Plin5	0	3.62206	0.262	0.004	0	4	Leydig
Klk1b27	0	3.62082	0.687	0.042	0	4	Leydig
Cbr3	0	3.6119	0.266	0.004	0	4	Leydig
Klk1b1	0	3.55321	0.262	0.005	0	4	Leydig
Bhmt	0	3.55058	0.917	0.05	0	4	Leydig
Klhl14	0	3.54994	0.254	0.003	0	4	Leydig
Klk1b21	0	3.51003	0.794	0.053	0	4	Leydig
Hsd3b1	0	3.48425	0.774	0.046	0	4	Leydig
Glrx	0	3.45673	0.325	0.004	0	4	Leydig
Gm43305	0	3.31376	0.274	0.004	0	4	Leydig
Star	0	3.24741	0.929	0.057	0	4	Leydig
Rhoj	0	3.23022	0.278	0.005	0	4	Leydig
Jak3	0	3.19293	0.353	0.007	0	4	Leydig
Adhfe1	0	3.1874	0.397	0.006	0	4	Leydig
Fos	0	3.14097	0.468	0.011	0	4	Leydig
Akr1cl	0	3.12231	0.996	0.103	0	4	Leydig
Gm6665	0	3.12177	0.5	0.008	0	4	Leydig
Gsta3	0	3.08375	0.933	0.04	0	4	Leydig
Sult1e1	0	3.0286	0.734	0.039	0	4	Leydig
Fxyd1	0	3.0104	0.96	0.046	0	4	Leydig
G0s2	0	3.00921	0.29	0.005	0	4	Leydig
Klk1b24	0	3.00341	0.813	0.045	0	4	Leydig
Klk1b22	0	3.00341	0.5	0.022	0	4	Leydig
Ppp1r14a	0	2.97206	0.556	0.01	0	4	Leydig
Gstm2	0	2.96502	0.976	0.12	0	4	Leydig
Maob	0	2.95028	0.298	0.005	0	4	Leydig
Apoc1	0	2.94529	0.869	0.061	0	4	Leydig
Idh1	0	2.9162	0.948	0.057	0	4	Leydig
Gsta2	0	2.90143	0.659	0.027	0	4	Leydig
Mr1	0	2.89562	0.254	0.004	0	4	Leydig
Cxcl16	0	2.89368	0.306	0.009	0	4	Leydig
Htra1	0	2.88894	0.615	0.015	0	4	Leydig
Aldh1a7	0	2.88013	0.742	0.018	0	4	Leydig
Gpx3	0	2.87767	0.333	0.013	0	4	Leydig
Esr1	0	2.87132	0.31	0.006	0	4	Leydig
Hmgcs2	0	2.86552	0.944	0.044	0	4	Leydig
2900052N01Rik	0	2.86438	0.397	0.007	0	4	Leydig
Cstb	0	2.8546	0.933	0.07	0	4	Leydig
Kcnk1	0	2.8472	0.385	0.006	0	4	Leydig
Tmem132a	0	2.84372	0.27	0.004	0	4	Leydig
9230104L09Rik	0	2.83864	0.464	0.018	0	4	Leydig
Nat8	0	2.83822	0.512	0.013	0	4	Leydig
Serpina3n	0	2.83543	0.508	0.012	0	4	Leydig
Osr2	0	2.83105	0.444	0.007	0	4	Leydig
Aldh4a1	0	2.82267	0.254	0.006	0	4	Leydig
Rhbg	0	2.81754	0.302	0.005	0	4	Leydig
Nat8f5	0	2.79528	0.433	0.007	0	4	Leydig
Serpinb1a	0	2.78418	0.667	0.012	0	4	Leydig
Aebp1	0	2.77642	0.508	0.014	0	4	Leydig
Cyp11a1	0	2.75491	0.837	0.059	0	4	Leydig
Nudt22	0	2.73552	0.345	0.008	0	4	Leydig
Hao2	0	2.73112	0.429	0.006	0	4	Leydig
Egr1	0	2.72627	0.46	0.016	0	4	Leydig
Rasd1	0	2.72152	0.536	0.013	0	4	Leydig
Armcx6	0	2.72027	0.579	0.008	0	4	Leydig
Klf15	0	2.71656	0.302	0.005	0	4	Leydig
Echdc3	0	2.71266	0.433	0.007	0	4	Leydig
Tpm2	0	2.70955	0.29	0.006	0	4	Leydig
Dcxr	0	2.70729	0.294	0.005	0	4	Leydig
Cebpb	0	2.69889	0.294	0.007	0	4	Leydig
Amacr	0	2.68847	0.389	0.009	0	4	Leydig
Vegfd	0	2.6865	0.417	0.008	0	4	Leydig
Mgst1	0	2.67098	0.984	0.08	0	4	Leydig
Vcam1	0	2.66652	0.972	0.068	0	4	Leydig
Aqp2	0	2.65627	0.865	0.026	0	4	Leydig
Emp3	0	2.65589	0.944	0.062	0	4	Leydig
Glb1l2	0	2.65356	0.381	0.006	0	4	Leydig
Idh2	0	2.65162	0.472	0.01	0	4	Leydig
Mrap	0	2.65038	0.758	0.019	0	4	Leydig
Txn1	0	2.63209	0.964	0.071	0	4	Leydig
Serpina3g	0	2.62479	0.627	0.013	0	4	Leydig
Cyp17a1	0	2.6247	0.96	0.122	0	4	Leydig
Mpnd	0	2.6059	0.385	0.008	0	4	Leydig
Lrg1	0	2.60087	0.841	0.035	0	4	Leydig
Jun	0	2.59144	0.571	0.035	0	4	Leydig
Gstt1	0	2.59055	0.274	0.005	0	4	Leydig
Parm1	0	2.5893	0.254	0.005	0	4	Leydig
Ier2	0	2.58743	0.381	0.013	0	4	Leydig
Aldh1a1	0	2.58307	0.98	0.094	0	4	Leydig
Oxtr	0	2.57832	0.353	0.006	0	4	Leydig
Prlr	0	2.57657	0.968	0.055	0	4	Leydig
Lcn2	0	2.57075	0.984	0.151	0	4	Leydig
Ociad2	0	2.56308	0.341	0.008	0	4	Leydig
Aldh2	0	2.55022	0.972	0.068	0	4	Leydig
Tdpx-ps1	0	2.53447	0.282	0.006	0	4	Leydig
C1rl	0	2.52169	0.389	0.007	0	4	Leydig
Ms4a10	0	2.51788	0.373	0.006	0	4	Leydig
Acsbg1	0	2.51286	0.98	0.069	0	4	Leydig
Tgm2	0	2.49977	0.329	0.007	0	4	Leydig
Lhcgr	0	2.49726	0.671	0.014	0	4	Leydig
S100a1	0	2.49525	0.571	0.011	0	4	Leydig
Sez6l2	0	2.48512	0.337	0.007	0	4	Leydig
Lipg	0	2.48441	0.881	0.046	0	4	Leydig
Junb	0	2.48013	0.516	0.016	0	4	Leydig
BC028528	0	2.47407	0.266	0.007	0	4	Leydig
Tm7sf2	0	2.44763	0.468	0.012	0	4	Leydig
1110008P14Rik	0	2.42168	0.925	0.07	0	4	Leydig
Pdlim2	0	2.41038	0.46	0.008	0	4	Leydig
AU021092	0	2.39416	0.782	0.032	0	4	Leydig
Deptor	0	2.39038	0.325	0.009	0	4	Leydig
Igfbp7	0	2.38749	0.988	0.068	0	4	Leydig
Ptms	0	2.378	0.675	0.034	0	4	Leydig
Arhgdib	0	2.37419	0.345	0.008	0	4	Leydig
Pck2	0	2.37333	0.317	0.009	0	4	Leydig
Spink4	0	2.37082	0.298	0.007	0	4	Leydig
Fam114a1	0	2.36813	0.278	0.009	0	4	Leydig
Rpl10	0	2.36735	0.937	0.066	0	4	Leydig
Vstm4	0	2.35983	0.421	0.008	0	4	Leydig
Il17rb	0	2.32783	0.448	0.01	0	4	Leydig
Nkain4	0	2.32137	0.27	0.006	0	4	Leydig
Pgam1	0	2.31984	0.262	0.007	0	4	Leydig
Cmbl	0	2.31379	0.619	0.013	0	4	Leydig
Aldoc	0	2.27698	0.567	0.016	0	4	Leydig
Tcaf1	0	2.27642	0.373	0.009	0	4	Leydig
Tmem35a	0	2.27446	0.714	0.022	0	4	Leydig
Msmo1	0	2.25698	0.893	0.051	0	4	Leydig
Copz2	0	2.24465	0.643	0.012	0	4	Leydig
H6pd	0	2.20801	0.258	0.006	0	4	Leydig
Agt	0	2.20581	0.956	0.101	0	4	Leydig
Khk	0	2.1883	0.369	0.009	0	4	Leydig
Ldhd	0	2.18046	0.282	0.007	0	4	Leydig
Gnl3l	0	2.1779	0.29	0.01	0	4	Leydig
Gpx8	0	2.17734	0.349	0.009	0	4	Leydig
Zadh2	0	2.17194	0.369	0.01	0	4	Leydig
Tspan8	0	2.16576	0.448	0.013	0	4	Leydig
Armcx2	0	2.15284	0.341	0.008	0	4	Leydig
Phyh	0	2.15268	0.587	0.016	0	4	Leydig
Samd9l	0	2.15012	0.294	0.008	0	4	Leydig
Isoc2b	0	2.14865	0.321	0.009	0	4	Leydig
Slc3a2	0	2.14847	0.948	0.12	0	4	Leydig
Sardh	0	2.13052	0.377	0.008	0	4	Leydig
Tst	0	2.1204	0.389	0.009	0	4	Leydig
Ephx1	0	2.10378	0.893	0.049	0	4	Leydig
Nr2f2	0	2.08643	0.433	0.013	0	4	Leydig
Tfpi	0	2.07733	0.262	0.005	0	4	Leydig
Hsd17b7	0	2.07678	0.504	0.022	0	4	Leydig
Ndrg2	0	2.06928	0.675	0.014	0	4	Leydig
Tmem176a	0	2.04345	0.96	0.053	0	4	Leydig
Pank1	0	2.03003	0.893	0.057	0	4	Leydig
Bst2	0	2.02528	0.44	0.014	0	4	Leydig
Rtn4rl1	0	2.02499	0.254	0.007	0	4	Leydig
Rcn3	0	2.02442	0.409	0.011	0	4	Leydig
Cavin1	0	2.0193	0.31	0.009	0	4	Leydig
Tmem176b	0	2.0177	0.972	0.048	0	4	Leydig
Ifitm2	0	2.00661	0.544	0.011	0	4	Leydig
Rgs2	0	2.00515	0.587	0.037	0	4	Leydig
Ifi27	0	1.99504	0.913	0.046	0	4	Leydig
Slc25a5	0	1.98669	0.952	0.073	0	4	Leydig
Mcee	0	1.96042	0.536	0.016	0	4	Leydig
Cebpd	0	1.95413	0.437	0.014	0	4	Leydig
Cd47	0	1.9523	0.913	0.06	0	4	Leydig
Tpm4	0	1.94821	0.508	0.018	0	4	Leydig
Serpinf1	0	1.9397	0.385	0.01	0	4	Leydig
Amy1	0	1.93621	0.718	0.027	0	4	Leydig
Trim56	0	1.9346	0.266	0.006	0	4	Leydig
Tceal9	0	1.92604	0.96	0.074	0	4	Leydig
Aldh1b1	0	1.91456	0.413	0.009	0	4	Leydig
Acadl	0	1.91172	0.893	0.044	0	4	Leydig
Rarres1	0	1.90715	0.385	0.014	0	4	Leydig
Klf3	0	1.90127	0.298	0.009	0	4	Leydig
Acaa2	0	1.8987	0.897	0.044	0	4	Leydig
Plxdc2	0	1.88529	0.337	0.009	0	4	Leydig
Ly6e	0	1.86933	0.929	0.059	0	4	Leydig
Bpifb5	0	1.86395	0.532	0.012	0	4	Leydig
Pgrmc1	0	1.86316	0.96	0.139	0	4	Leydig
Cat	0	1.84897	0.393	0.015	0	4	Leydig
Ctsh	0	1.8411	0.679	0.025	0	4	Leydig
Cd36	0	1.84109	0.861	0.031	0	4	Leydig
C1s1	0	1.8403	0.365	0.009	0	4	Leydig
Ecm1	0	1.8374	0.659	0.016	0	4	Leydig
Scd1	0	1.8335	0.54	0.012	0	4	Leydig
4930426D05Rik	0	1.82971	0.389	0.007	0	4	Leydig
Lss	0	1.82663	0.488	0.027	0	4	Leydig
Cd81	0	1.81623	0.933	0.079	0	4	Leydig
Tesc	0	1.81293	0.389	0.01	0	4	Leydig
Gbp7	0	1.81142	0.31	0.009	0	4	Leydig
Sparc	0	1.79983	0.992	0.16	0	4	Leydig
Tcn2	0	1.79784	0.488	0.013	0	4	Leydig
Gm44250	0	1.79505	0.476	0.01	0	4	Leydig
Creb3l1	0	1.79071	0.349	0.006	0	4	Leydig
C1ra	0	1.78792	0.333	0.008	0	4	Leydig
Adh5	0	1.78113	0.885	0.056	0	4	Leydig
Slc7a8	0	1.77754	0.536	0.014	0	4	Leydig
Nucb2	0	1.76553	0.869	0.074	0	4	Leydig
Msrb1	0	1.75523	0.48	0.017	0	4	Leydig
Ssr4	0	1.75353	0.901	0.067	0	4	Leydig
Apln	0	1.74946	0.329	0.009	0	4	Leydig
Pcolce	0	1.74718	0.933	0.07	0	4	Leydig
Cox8a	0	1.74501	0.948	0.086	0	4	Leydig
Pkdcc	0	1.73609	0.425	0.013	0	4	Leydig
Efnb1	0	1.73129	0.528	0.015	0	4	Leydig
Sult1a1	0	1.72907	0.488	0.012	0	4	Leydig
Gusb	0	1.72823	0.317	0.012	0	4	Leydig
Ldlr	0	1.70691	0.306	0.01	0	4	Leydig
Mgarp	0	1.7046	0.873	0.049	0	4	Leydig
Dhcr24	0	1.70241	0.841	0.047	0	4	Leydig
H2-T23	0	1.69258	0.274	0.007	0	4	Leydig
Ces1d	0	1.68625	0.833	0.034	0	4	Leydig
Irf8	0	1.67768	0.464	0.012	0	4	Leydig
Hist1h1c	0	1.67659	0.389	0.012	0	4	Leydig
Csf1	0	1.67603	0.286	0.008	0	4	Leydig
Hsd17b3	0	1.6735	0.853	0.032	0	4	Leydig
Fcgrt	0	1.66639	0.381	0.009	0	4	Leydig
Coq8a	0	1.65274	0.437	0.014	0	4	Leydig
Itih2	0	1.64665	0.444	0.012	0	4	Leydig
Nr5a1	0	1.64278	0.397	0.011	0	4	Leydig
Nek7	0	1.6407	0.389	0.019	0	4	Leydig
Serpina3c	0	1.64051	0.71	0.017	0	4	Leydig
Timp2	0	1.63742	0.96	0.13	0	4	Leydig
Lbp	0	1.6317	0.306	0.007	0	4	Leydig
Casp3	0	1.62994	0.298	0.01	0	4	Leydig
Tkt	0	1.62376	0.754	0.03	0	4	Leydig
Rnase4	0	1.62193	0.556	0.017	0	4	Leydig
Cdc42ep5	0	1.61697	0.452	0.011	0	4	Leydig
Lgals3bp	0	1.61641	0.321	0.009	0	4	Leydig
Asah1	0	1.61249	0.659	0.026	0	4	Leydig
Akr1b10	0	1.60957	0.353	0.009	0	4	Leydig
Elovl5	0	1.60597	0.905	0.054	0	4	Leydig
Nat8f1	0	1.60488	0.552	0.018	0	4	Leydig
Sdsl	0	1.60459	0.266	0.008	0	4	Leydig
Serping1	0	1.60187	0.786	0.028	0	4	Leydig
Pld3	0	1.59879	0.921	0.067	0	4	Leydig
Cxcl12	0	1.59809	0.758	0.02	0	4	Leydig
Rcn1	0	1.59792	0.563	0.015	0	4	Leydig
Acat1	0	1.586	0.889	0.095	0	4	Leydig
Efemp1	0	1.58493	0.274	0.008	0	4	Leydig
Acad8	0	1.57981	0.56	0.022	0	4	Leydig
Fads2	0	1.57944	0.627	0.016	0	4	Leydig
Mafb	0	1.57854	0.429	0.013	0	4	Leydig
Klk1b16	0	1.57281	0.46	0.016	0	4	Leydig
Pja1	0	1.57072	0.869	0.079	0	4	Leydig
Grhpr	0	1.56419	0.639	0.02	0	4	Leydig
2210013O21Rik	0	1.56042	0.349	0.014	0	4	Leydig
Ndufa4	0	1.55279	0.937	0.115	0	4	Leydig
Sc5d	0	1.54204	0.821	0.059	0	4	Leydig
Cox6b1	0	1.54138	0.909	0.119	0	4	Leydig
Gm6977	0	1.53927	0.385	0.016	0	4	Leydig
Etfb	0	1.53798	0.877	0.063	0	4	Leydig
Pla2g16	0	1.53211	0.429	0.015	0	4	Leydig
Pon3	0	1.53035	0.758	0.019	0	4	Leydig
Hmgcs1	0	1.52972	0.81	0.079	0	4	Leydig
Ftl1	0	1.52794	0.857	0.055	0	4	Leydig
Blvrb	0	1.52589	0.579	0.022	0	4	Leydig
Hsd17b10	0	1.52517	0.802	0.029	0	4	Leydig
Nedd4	0	1.52483	0.774	0.08	0	4	Leydig
Scd2	0	1.51743	0.905	0.068	0	4	Leydig
Sfxn2	0	1.51287	0.282	0.009	0	4	Leydig
Arhgap18	0	1.50289	0.357	0.011	0	4	Leydig
Tspo	0	1.48793	0.683	0.03	0	4	Leydig
Hpgd	0	1.48651	0.508	0.019	0	4	Leydig
Prss35	0	1.48553	0.409	0.017	0	4	Leydig
Dhcr7	0	1.47719	0.528	0.02	0	4	Leydig
Tmem109	0	1.47178	0.639	0.03	0	4	Leydig
C2	0	1.46788	0.631	0.018	0	4	Leydig
Retsat	0	1.44647	0.532	0.018	0	4	Leydig
Cyb5r3	0	1.43926	0.94	0.138	0	4	Leydig
Acadm	0	1.43251	0.845	0.045	0	4	Leydig
Pgbd5	0	1.43229	0.31	0.009	0	4	Leydig
Cyp27a1	0	1.42727	0.377	0.01	0	4	Leydig
Tmem160	0	1.42723	0.433	0.013	0	4	Leydig
Sugct	0	1.42184	0.369	0.018	0	4	Leydig
Susd3	0	1.41851	0.905	0.073	0	4	Leydig
Suclg2	0	1.40021	0.48	0.02	0	4	Leydig
Mir22hg	0	1.39695	0.512	0.019	0	4	Leydig
Snx10	0	1.3943	0.524	0.032	0	4	Leydig
Igbp1	0	1.37877	0.333	0.011	0	4	Leydig
Nsdhl	0	1.37875	0.599	0.022	0	4	Leydig
Folr1	0	1.37558	0.813	0.039	0	4	Leydig
Cox7b	0	1.3696	0.861	0.045	0	4	Leydig
Ifitm3	0	1.36941	0.401	0.012	0	4	Leydig
Psme1	0	1.36012	0.794	0.037	0	4	Leydig
Glmp	0	1.35713	0.361	0.01	0	4	Leydig
Prcd	0	1.34655	0.56	0.019	0	4	Leydig
Hyi	0	1.3439	0.353	0.015	0	4	Leydig
Gpx1	0	1.33417	0.901	0.059	0	4	Leydig
Dhrs7	0	1.32016	0.774	0.036	0	4	Leydig
Echs1	0	1.32011	0.853	0.042	0	4	Leydig
Plod2	0	1.31689	0.48	0.029	0	4	Leydig
Fads6	0	1.315	0.504	0.019	0	4	Leydig
Acat2	0	1.31341	0.488	0.021	0	4	Leydig
Rnh1	0	1.31013	0.77	0.032	0	4	Leydig
Zfp36l1	0	1.30744	0.611	0.033	0	4	Leydig
Rpl39	0	1.30495	0.75	0.043	0	4	Leydig
Cp	0	1.30044	0.532	0.02	0	4	Leydig
Wnt6	0	1.29037	0.738	0.021	0	4	Leydig
Eci1	0	1.2891	0.675	0.032	0	4	Leydig
Tmem52	0	1.28707	0.421	0.018	0	4	Leydig
Tecr	0	1.28305	0.821	0.083	0	4	Leydig
Prdx3	0	1.27814	0.75	0.033	0	4	Leydig
Fdxr	0	1.27692	0.754	0.04	0	4	Leydig
Anxa5	0	1.26482	0.639	0.019	0	4	Leydig
Ogn	0	1.26203	0.361	0.015	0	4	Leydig
Clybl	0	1.26151	0.345	0.012	0	4	Leydig
Mcts1	0	1.2601	0.325	0.01	0	4	Leydig
S100a10	0	1.2557	0.591	0.024	0	4	Leydig
Mdh1	0	1.25074	0.853	0.053	0	4	Leydig
Nenf	0	1.23307	0.746	0.04	0	4	Leydig
Ndufb11	0	1.2286	0.841	0.058	0	4	Leydig
Pdha1	0	1.22747	0.321	0.011	0	4	Leydig
Prdx2	0	1.22716	0.909	0.096	0	4	Leydig
Twf2	0	1.21925	0.353	0.015	0	4	Leydig
Shisa5	0	1.20339	0.321	0.01	0	4	Leydig
Mcrip2	0	1.18696	0.667	0.03	0	4	Leydig
Cln5	0	1.18199	0.306	0.011	0	4	Leydig
Tpm1	0	1.17108	0.591	0.03	0	4	Leydig
Fads1	0	1.16853	0.694	0.026	0	4	Leydig
Ece1	0	1.16776	0.452	0.021	0	4	Leydig
Hadh	0	1.15993	0.786	0.041	0	4	Leydig
Selenbp1	0	1.15721	0.675	0.015	0	4	Leydig
Rps4x	0	1.14832	0.845	0.034	0	4	Leydig
Plgrkt	0	1.14369	0.444	0.017	0	4	Leydig
Mettl26	0	1.13794	0.738	0.058	0	4	Leydig
Cpt1a	0	1.13538	0.44	0.019	0	4	Leydig
Tmem164	0	1.11636	0.29	0.009	0	4	Leydig
Tceal8	0	1.11176	0.528	0.02	0	4	Leydig
Fdps	0	1.11068	0.536	0.029	0	4	Leydig
Gpt2	0	1.10526	0.766	0.03	0	4	Leydig
Crtap	0	1.1042	0.687	0.037	0	4	Leydig
A930005H10Rik	0	1.0997	0.488	0.031	0	4	Leydig
Sec61b	0	1.0955	0.853	0.104	0	4	Leydig
Enpp5	0	1.09235	0.488	0.018	0	4	Leydig
Hsd17b12	0	1.08767	0.786	0.051	0	4	Leydig
Gstk1	0	1.0742	0.456	0.013	0	4	Leydig
Reep3	0	1.07306	0.532	0.02	0	4	Leydig
Etfa	0	1.06166	0.829	0.081	0	4	Leydig
Abracl	0	1.05844	0.504	0.021	0	4	Leydig
Ddit4	0	1.04603	0.409	0.018	0	4	Leydig
Mettl7a1	0	1.0401	0.488	0.013	0	4	Leydig
Eva1b	0	1.03596	0.393	0.014	0	4	Leydig
Sh3bgrl	0	1.02576	0.627	0.02	0	4	Leydig
Cnpy2	0	1.02291	0.667	0.032	0	4	Leydig
Psme2	0	1.01276	0.69	0.048	0	4	Leydig
Tmem86a	0	1.00334	0.48	0.027	0	4	Leydig
Creg1	0	0.982884	0.841	0.083	0	4	Leydig
Selenop	0	0.977721	0.992	0.069	0	4	Leydig
Aox1	0	0.973376	0.337	0.012	0	4	Leydig
Spon1	0	0.966178	0.683	0.022	0	4	Leydig
Ifnar2	0	0.959942	0.448	0.012	0	4	Leydig
Cpq	0	0.959191	0.75	0.047	0	4	Leydig
Ebp	0	0.958091	0.651	0.026	0	4	Leydig
Acadsb	0	0.955944	0.746	0.043	0	4	Leydig
Emc9	0	0.951375	0.468	0.015	0	4	Leydig
Cped1	0	0.927853	0.405	0.012	0	4	Leydig
Rps3a3	0	0.923086	0.671	0.06	0	4	Leydig
Serpina5	0	0.914789	0.599	0.041	0	4	Leydig
Lmo4	0	0.908349	0.651	0.029	0	4	Leydig
Tpp1	0	0.907543	0.341	0.01	0	4	Leydig
Cyb5a	0	0.907311	0.837	0.095	0	4	Leydig
Heg1	0	0.905431	0.595	0.024	0	4	Leydig
Reep5	0	0.894703	0.798	0.053	0	4	Leydig
Dbt	0	0.891635	0.381	0.018	0	4	Leydig
Rpl36a	0	0.887018	0.786	0.055	0	4	Leydig
2410002F23Rik	0	0.884927	0.429	0.023	0	4	Leydig
Ccdc107	0	0.880875	0.671	0.038	0	4	Leydig
Tmem50a	0	0.864844	0.81	0.067	0	4	Leydig
Tbc1d9b	0	0.860373	0.341	0.014	0	4	Leydig
Kitl	0	0.842823	0.492	0.027	0	4	Leydig
Ctsb	0	0.841581	0.921	0.073	0	4	Leydig
Gm20417	0	0.838108	0.492	0.025	0	4	Leydig
Rbp1	0	0.83652	0.794	0.043	0	4	Leydig
Tmem256	0	0.828578	0.73	0.041	0	4	Leydig
Cd302	0	0.823589	0.73	0.048	0	4	Leydig
Smim4	0	0.820053	0.571	0.031	0	4	Leydig
Sparcl1	0	0.819112	0.798	0.03	0	4	Leydig
Snhg18	0	0.805138	0.421	0.015	0	4	Leydig
Fabp5	0	0.777946	0.472	0.019	0	4	Leydig
Maged2	0	0.772526	0.508	0.029	0	4	Leydig
Eci2	0	0.769033	0.607	0.029	0	4	Leydig
Wls	0	0.751085	0.361	0.01	0	4	Leydig
B2m	0	0.749267	0.925	0.086	0	4	Leydig
Tnfrsf1a	0	0.741181	0.337	0.013	0	4	Leydig
Cd59a	0	0.735002	0.754	0.06	0	4	Leydig
Hspd1	0	0.727657	0.806	0.087	0	4	Leydig
Gas6	0	0.723412	0.536	0.029	0	4	Leydig
Idh3g	0	0.720288	0.595	0.038	0	4	Leydig
Aox3	0	0.711742	0.516	0.035	0	4	Leydig
Ggh	0	0.70886	0.734	0.048	0	4	Leydig
Igfbp6	0	0.688734	0.532	0.016	0	4	Leydig
Selenom	0	0.688495	0.56	0.022	0	4	Leydig
Hist1h2bc	0	0.680509	0.754	0.031	0	4	Leydig
Scpep1	0	0.677407	0.603	0.037	0	4	Leydig
Cnih1	0	0.667948	0.567	0.035	0	4	Leydig
Gapdh	0	0.645075	0.544	0.032	0	4	Leydig
S100a11	0	0.642081	0.401	0.019	0	4	Leydig
Prr13	0	0.641714	0.437	0.017	0	4	Leydig
Atraid	0	0.627881	0.73	0.06	0	4	Leydig
Slc25a4	0	0.623907	0.853	0.081	0	4	Leydig
Htra3	0	0.590686	0.389	0.011	0	4	Leydig
Irak1	0	0.553201	0.433	0.018	0	4	Leydig
Pccb	0	0.535186	0.504	0.029	0	4	Leydig
Magt1	0	0.523251	0.488	0.03	0	4	Leydig
Oat	0	0.519225	0.667	0.046	0	4	Leydig
Gsta4	0	0.514023	0.833	0.092	0	4	Leydig
Tshz2	0	0.507777	0.671	0.021	0	4	Leydig
Nfib	0	0.505644	0.421	0.013	0	4	Leydig
1500009L16Rik	0	0.496359	0.56	0.037	0	4	Leydig
Smarca1	0	0.490802	0.567	0.025	0	4	Leydig
Tspan4	0	0.475603	0.464	0.02	0	4	Leydig
Cr1l	0	0.475442	0.433	0.018	0	4	Leydig
Tecpr1	0	0.473412	0.556	0.037	0	4	Leydig
Dpm3	0	0.460662	0.619	0.039	0	4	Leydig
Acaa1a	0	0.449547	0.532	0.025	0	4	Leydig
Rnaset2b	0	0.416305	0.544	0.035	0	4	Leydig
Tspan31	0	0.412033	0.413	0.018	0	4	Leydig
Rbbp7	0	0.405982	0.885	0.091	0	4	Leydig
Mmd2	0	0.384232	0.667	0.04	0	4	Leydig
Pts	0	0.379387	0.444	0.025	0	4	Leydig
Cenpb	0	0.370058	0.405	0.016	0	4	Leydig
Slc48a1	0	0.362979	0.456	0.015	0	4	Leydig
Aldh1l1	0	0.344845	0.73	0.065	0	4	Leydig
Mdp1	0	0.342821	0.421	0.021	0	4	Leydig
Ctsd	0	0.339018	0.742	0.057	0	4	Leydig
Abca1	0	0.334758	0.599	0.034	0	4	Leydig
Pros1	0	0.330972	0.421	0.019	0	4	Leydig
Decr1	0	0.318779	0.536	0.035	0	4	Leydig
C7	0	0.302693	0.583	0.036	0	4	Leydig
Fundc2	0	0.295475	0.504	0.028	0	4	Leydig
Eps8	6.65649e-308	0.966116	0.385	0.019	1.28217e-303	4	Leydig
1500011K16Rik	1.36813e-307	0.845322	0.452	0.027	2.63529e-303	4	Leydig
Cd151	2.5487e-306	0.4042	0.687	0.065	4.90931e-302	4	Leydig
Ptgds	2.38103e-304	2.85146	0.984	0.18	4.58634e-300	4	Leydig
Dynlrb1	7.3766e-304	0.552145	0.77	0.081	1.42088e-299	4	Leydig
Col1a2	4.85471e-303	0.509929	0.349	0.016	9.35114e-299	4	Leydig
Sqstm1	1.08021e-302	0.839554	0.802	0.094	2.08069e-298	4	Leydig
Psme2b	2.2232e-301	1.85796	0.27	0.009	4.28232e-297	4	Leydig
Tmed3	2.2379e-299	1.04971	0.813	0.098	4.31064e-295	4	Leydig
Fkbp2	2.28114e-299	1.07083	0.825	0.102	4.39393e-295	4	Leydig
Lrp10	1.89727e-298	1.0541	0.325	0.014	3.65451e-294	4	Leydig
Ssr3	2.75522e-298	0.405836	0.687	0.067	5.3071e-294	4	Leydig
2018-03-02	3.45416e-297	0.364718	0.73	0.076	6.65341e-293	4	Leydig
2310009B15Rik	1.81189e-295	1.27029	0.444	0.028	3.49007e-291	4	Leydig
Gnas	2.19423e-294	1.7685	0.976	0.16	4.22653e-290	4	Leydig
Hspe1	7.96442e-294	1.09465	0.798	0.092	1.53411e-289	4	Leydig
Brcc3	2.0523e-293	0.413306	0.349	0.017	3.95314e-289	4	Leydig
Pgk1	2.44296e-291	2.2577	0.266	0.009	4.70562e-287	4	Leydig
Stxbp3	4.05785e-291	0.723492	0.405	0.023	7.81623e-287	4	Leydig
Zfp36	3.83204e-290	2.72782	0.274	0.01	7.38127e-286	4	Leydig
Smim26	6.73553e-289	1.60414	0.329	0.015	1.2974e-284	4	Leydig
Rbm3	8.5854e-288	1.00491	0.425	0.026	1.65372e-283	4	Leydig
Gsto1	6.56975e-287	2.30716	0.294	0.012	1.26546e-282	4	Leydig
Bnip3	4.84468e-286	0.371664	0.544	0.043	9.33183e-282	4	Leydig
Slc22a17	1.26145e-285	2.02068	0.29	0.011	2.4298e-281	4	Leydig
Soat1	2.79219e-285	0.640856	0.702	0.073	5.37832e-281	4	Leydig
Ndufa1	8.79559e-285	1.384	0.937	0.142	1.69421e-280	4	Leydig
Abr	6.98557e-281	1.58971	0.282	0.011	1.34556e-276	4	Leydig
Dhrs3	3.5234e-280	1.84573	0.258	0.009	6.78677e-276	4	Leydig
Vim	4.54056e-280	0.970169	0.627	0.057	8.74602e-276	4	Leydig
Cnn3	9.6351e-280	1.00739	0.369	0.02	1.85591e-275	4	Leydig
Dmd	1.01995e-279	0.487946	0.349	0.017	1.96463e-275	4	Leydig
Mylk	4.39133e-278	0.962683	0.587	0.053	8.45858e-274	4	Leydig
Serinc3	9.56851e-277	1.99629	0.992	0.199	1.84309e-272	4	Leydig
Slc29a1	7.56554e-276	0.844912	0.679	0.071	1.45727e-271	4	Leydig
Fkbp9	1.72211e-275	1.00518	0.353	0.018	3.31713e-271	4	Leydig
Lamp2	2.14658e-275	1.08512	0.825	0.107	4.13474e-271	4	Leydig
Il11ra1	1.61119e-274	1.32374	0.365	0.02	3.10347e-270	4	Leydig
Alas1	3.45313e-274	1.50568	0.829	0.117	6.65142e-270	4	Leydig
Alg2	8.22164e-274	1.07605	0.317	0.015	1.58365e-269	4	Leydig
Iqgap2	1.72711e-273	0.600043	0.448	0.03	3.32676e-269	4	Leydig
Elovl1	2.07445e-273	1.62267	0.266	0.01	3.99582e-269	4	Leydig
Anxa4	3.90797e-270	1.56494	0.274	0.011	7.52753e-266	4	Leydig
Dbi	1.53322e-269	2.14671	0.992	0.208	2.95328e-265	4	Leydig
Hexb	7.58284e-268	0.762055	0.278	0.011	1.46061e-263	4	Leydig
Col3a1	3.84456e-267	1.80155	0.29	0.012	7.40539e-263	4	Leydig
Mvd	2.35238e-265	1.41307	0.317	0.015	4.53116e-261	4	Leydig
Gadd45g	1.57188e-263	2.19062	0.286	0.012	3.02776e-259	4	Leydig
Mrpl14	3.04152e-263	0.577753	0.52	0.043	5.85858e-259	4	Leydig
Abhd3	3.77117e-263	1.21332	0.325	0.016	7.26403e-259	4	Leydig
Grb14	6.47015e-263	1.38919	0.278	0.011	1.24628e-258	4	Leydig
Fdx1	6.64925e-262	2.45248	0.944	0.185	1.28078e-257	4	Leydig
Mid1ip1	7.76201e-262	0.723982	0.321	0.016	1.49512e-257	4	Leydig
Efemp2	1.0613e-261	1.4175	0.278	0.012	2.04428e-257	4	Leydig
Anxa2	4.37107e-261	0.704221	0.806	0.106	8.41955e-257	4	Leydig
Timp1	5.38973e-261	1.25015	0.286	0.012	1.03817e-256	4	Leydig
Tshz1	2.10915e-260	1.42499	0.266	0.011	4.06264e-256	4	Leydig
Fermt2	2.76256e-260	1.08024	0.5	0.039	5.32124e-256	4	Leydig
Cst3	2.91631e-259	2.68693	0.996	0.23	5.6174e-255	4	Leydig
Ctsf	1.3293e-258	1.23682	0.452	0.032	2.56049e-254	4	Leydig
Slc25a16	2.55959e-258	1.71615	0.254	0.01	4.93028e-254	4	Leydig
Gnb5	1.22297e-256	1.77797	0.254	0.01	2.35568e-252	4	Leydig
Mdh2	1.02053e-254	0.749743	0.758	0.093	1.96574e-250	4	Leydig
Defb19	1.55668e-254	1.5112	0.996	0.202	2.99848e-250	4	Leydig
Rock2	1.73021e-254	0.456454	0.758	0.093	3.33273e-250	4	Leydig
AC156572.1	3.16971e-254	1.98287	0.266	0.011	6.10549e-250	4	Leydig
Abhd14b	1.52383e-253	1.21259	0.282	0.012	2.9352e-249	4	Leydig
Akr1a1	7.69822e-253	0.971636	0.845	0.126	1.48283e-248	4	Leydig
Pim3	1.67519e-252	1.0586	0.437	0.031	3.22675e-248	4	Leydig
Erg28	6.47508e-252	1.39396	0.563	0.053	1.24723e-247	4	Leydig
Tsc22d1	1.48204e-250	2.08935	0.976	0.224	2.8547e-246	4	Leydig
Psma7	1.95026e-248	1.19556	0.925	0.158	3.75658e-244	4	Leydig
Phb	3.68166e-247	1.06966	0.353	0.021	7.09162e-243	4	Leydig
Cox14	3.73782e-245	0.762595	0.79	0.108	7.19978e-241	4	Leydig
Pqbp1	2.86974e-244	0.326875	0.357	0.021	5.52769e-240	4	Leydig
Mif	8.55769e-243	0.486983	0.754	0.095	1.64838e-238	4	Leydig
Acadvl	2.84785e-242	0.297256	0.54	0.051	5.48553e-238	4	Leydig
Pgap2	4.07276e-241	0.821003	0.766	0.103	7.84496e-237	4	Leydig
Pcbd2	1.80159e-240	0.73685	0.401	0.028	3.47022e-236	4	Leydig
C1qtnf3	6.48919e-240	0.970057	0.325	0.018	1.24995e-235	4	Leydig
Rbm47	1.29872e-239	1.27844	0.321	0.017	2.50159e-235	4	Leydig
Spr	2.53692e-239	0.825627	0.258	0.011	4.88661e-235	4	Leydig
Psen2	4.99166e-236	0.789523	0.282	0.013	9.61493e-232	4	Leydig
Prdx1	8.06431e-236	1.67525	0.972	0.204	1.55335e-231	4	Leydig
Enc1	1.08018e-235	1.1076	0.266	0.012	2.08064e-231	4	Leydig
Nudt19	2.95995e-235	0.333284	0.417	0.03	5.70146e-231	4	Leydig
Cyp51	6.58136e-234	1.35581	0.833	0.131	1.2677e-229	4	Leydig
Me1	5.2821e-233	1.75061	0.948	0.209	1.01744e-228	4	Leydig
Stard4	2.56785e-232	0.874452	0.369	0.024	4.94619e-228	4	Leydig
Slc22a5	2.78289e-232	0.699733	0.361	0.023	5.36039e-228	4	Leydig
Btg2	8.07577e-231	1.61158	0.329	0.019	1.55555e-226	4	Leydig
Ctsz	6.98263e-230	0.355627	0.298	0.015	1.34499e-225	4	Leydig
Tfdp2	1.79562e-229	0.781479	0.603	0.065	3.45872e-225	4	Leydig
Rab3d	4.62773e-229	2.05491	0.254	0.011	8.91393e-225	4	Leydig
Cflar	7.33272e-229	1.16704	0.29	0.015	1.41243e-224	4	Leydig
Myh9	1.13958e-228	0.847366	0.278	0.013	2.19507e-224	4	Leydig
Adi1	4.45308e-228	0.310492	0.282	0.014	8.57753e-224	4	Leydig
Myl12b	1.91334e-227	0.945484	0.817	0.128	3.68548e-223	4	Leydig
Slc35a1	2.04133e-227	1.36978	0.306	0.017	3.932e-223	4	Leydig
Pdgfra	3.22629e-226	0.820875	0.266	0.012	6.21448e-222	4	Leydig
Hspa8	1.9511e-225	0.839645	0.837	0.129	3.7582e-221	4	Leydig
Os9	2.15464e-225	0.850352	0.69	0.09	4.15027e-221	4	Leydig
Comtd1	7.45162e-225	0.412428	0.274	0.013	1.43533e-220	4	Leydig
Cad	1.25519e-223	1.23245	0.29	0.015	2.41775e-219	4	Leydig
Cope	3.99935e-222	0.896949	0.806	0.128	7.70354e-218	4	Leydig
Cited2	6.60726e-222	0.426326	0.317	0.018	1.27269e-217	4	Leydig
Atp5l	1.29149e-220	1.20232	0.389	0.029	2.48767e-216	4	Leydig
Atp5g2	1.35972e-220	1.44413	0.278	0.014	2.61909e-216	4	Leydig
Ei24	4.01002e-220	0.641483	0.397	0.03	7.7241e-216	4	Leydig
Ech1	6.99268e-220	0.953752	0.829	0.137	1.34693e-215	4	Leydig
Ezr	4.25853e-219	0.324863	0.429	0.035	8.20278e-215	4	Leydig
Atp5g3	3.9754e-217	1.2697	0.909	0.174	7.65741e-213	4	Leydig
Chchd10	2.28472e-216	0.601022	0.841	0.139	4.40084e-212	4	Leydig
Ddrgk1	4.65394e-216	1.01546	0.821	0.14	8.96442e-212	4	Leydig
Abat	1.14016e-214	0.281321	0.278	0.014	2.19618e-210	4	Leydig
Aldh9a1	9.41204e-212	0.387225	0.75	0.112	1.81295e-207	4	Leydig
Mpeg1	2.25387e-211	0.280379	0.258	0.013	4.3414e-207	4	Leydig
Ppib	7.19513e-210	0.721744	0.817	0.131	1.38593e-205	4	Leydig
Mvk	2.59166e-209	1.3956	0.333	0.022	4.99205e-205	4	Leydig
Pmvk	2.43681e-207	0.412949	0.425	0.036	4.69379e-203	4	Leydig
Rsu1	2.67724e-207	1.32346	0.262	0.013	5.15691e-203	4	Leydig
Fth1	5.59738e-207	2.11738	1	0.329	1.07817e-202	4	Leydig
Gadd45a	1.46591e-206	0.508742	0.266	0.014	2.82363e-202	4	Leydig
Aldh6a1	3.69965e-204	1.04101	0.357	0.026	7.12627e-200	4	Leydig
Ndufc2	1.89282e-202	1.51577	0.901	0.181	3.64596e-198	4	Leydig
9430038I01Rik	2.72223e-202	1.29554	0.306	0.019	5.24357e-198	4	Leydig
Pex2	9.78853e-202	0.66457	0.361	0.027	1.88547e-197	4	Leydig
Tprkb	1.92524e-201	1.28868	0.409	0.034	3.7084e-197	4	Leydig
Pbx1	1.19793e-200	0.402861	0.302	0.019	2.30745e-196	4	Leydig
Psmb3	6.98974e-200	0.735319	0.821	0.141	1.34636e-195	4	Leydig
Iscu	8.95707e-200	0.459974	0.726	0.115	1.72531e-195	4	Leydig
H1f0	2.21722e-199	1.07483	0.429	0.038	4.27081e-195	4	Leydig
Nars	6.62894e-199	0.544008	0.722	0.107	1.27687e-194	4	Leydig
Aldoa	3.42438e-196	1.25876	0.893	0.189	6.59604e-192	4	Leydig
P4hb	6.15507e-196	0.667781	0.73	0.109	1.18559e-191	4	Leydig
Jkamp	7.41674e-196	0.565855	0.381	0.03	1.42861e-191	4	Leydig
Ywhab	7.81898e-196	0.757476	0.837	0.146	1.50609e-191	4	Leydig
Hexim1	6.60931e-195	0.276492	0.48	0.049	1.27309e-190	4	Leydig
Lamb1	2.50136e-194	0.574637	0.278	0.016	4.81812e-190	4	Leydig
Tpm3	5.88467e-194	0.264808	0.774	0.127	1.1335e-189	4	Leydig
Glb1	3.11554e-190	0.706087	0.31	0.021	6.00114e-186	4	Leydig
Fam50a	4.34412e-190	0.92314	0.353	0.027	8.36764e-186	4	Leydig
Tmem159	1.08413e-188	1.66443	0.274	0.016	2.08826e-184	4	Leydig
Rab34	5.82955e-188	0.839464	0.325	0.023	1.12289e-183	4	Leydig
Uqcr11	1.37613e-187	1.0796	0.885	0.191	2.65069e-183	4	Leydig
Romo1	4.78202e-185	0.721302	0.754	0.131	9.21113e-181	4	Leydig
Tmem205	4.24119e-184	1.19463	0.925	0.209	8.16938e-180	4	Leydig
Sec62	7.47717e-183	0.505102	0.841	0.158	1.44025e-178	4	Leydig
Adck5	1.64227e-179	1.09236	0.321	0.024	3.16334e-175	4	Leydig
Atp6v0e	2.06192e-178	0.373521	0.746	0.125	3.97167e-174	4	Leydig
Npc2	2.18185e-178	0.925566	0.829	0.159	4.20269e-174	4	Leydig
Gm8566	3.95818e-177	0.640219	0.313	0.023	7.62425e-173	4	Leydig
Tmem59	2.54182e-176	0.687242	0.79	0.143	4.89604e-172	4	Leydig
Bckdk	9.62303e-175	0.562843	0.254	0.015	1.85359e-170	4	Leydig
Mblac2	1.02153e-174	0.842933	0.274	0.018	1.96768e-170	4	Leydig
Glul	2.37237e-174	1.05451	0.937	0.212	4.56967e-170	4	Leydig
Mpv17	4.07598e-174	0.705433	0.262	0.016	7.85116e-170	4	Leydig
Slc25a3	8.63977e-173	1.1761	0.929	0.23	1.66419e-168	4	Leydig
Lamb2	2.0093e-172	0.253226	0.254	0.015	3.87032e-168	4	Leydig
Cox6a1	7.59495e-170	1.75394	0.988	0.388	1.46294e-165	4	Leydig
Ilvbl	7.28295e-169	1.47341	0.254	0.016	1.40284e-164	4	Leydig
Nme2	9.9497e-169	0.956629	0.274	0.018	1.91651e-164	4	Leydig
Tcf25	4.68579e-168	0.467045	0.718	0.117	9.02578e-164	4	Leydig
Rtn4	1.44097e-166	0.265874	0.706	0.118	2.77559e-162	4	Leydig
Ginm1	4.03739e-166	0.357037	0.579	0.081	7.77682e-162	4	Leydig
Ndufs8	1.00999e-165	0.902282	0.734	0.134	1.94545e-161	4	Leydig
Uqcr10	2.52403e-164	1.33396	0.952	0.291	4.86179e-160	4	Leydig
Atox1	4.49725e-163	0.962499	0.837	0.185	8.66261e-159	4	Leydig
Itm2b	2.07101e-162	1.39059	0.984	0.362	3.98918e-158	4	Leydig
Tsen34	2.32093e-161	1.07617	0.365	0.034	4.47058e-157	4	Leydig
Abhd4	1.88852e-160	0.585321	0.766	0.146	3.63767e-156	4	Leydig
Ndufa3	6.4272e-158	0.564187	0.81	0.169	1.23801e-153	4	Leydig
Psma2	2.22798e-156	0.575206	0.829	0.172	4.29154e-152	4	Leydig
Dnlz	3.56737e-155	0.417777	0.345	0.032	6.87148e-151	4	Leydig
Ndufv3	6.57648e-155	0.561333	0.694	0.127	1.26676e-150	4	Leydig
Fam213a	3.57649e-154	1.11706	0.893	0.223	6.88904e-150	4	Leydig
Malat1	6.66828e-154	0.567838	0.992	0.484	1.28444e-149	4	Leydig
Hmgcl	1.23516e-153	1.05655	0.27	0.019	2.37917e-149	4	Leydig
Gm10039	7.16567e-152	0.776797	0.282	0.022	1.38025e-147	4	Leydig
Tmem147	3.06056e-151	0.765396	0.806	0.174	5.89525e-147	4	Leydig
Ccs	4.50744e-151	0.35294	0.687	0.126	8.68223e-147	4	Leydig
Mpc1	2.92106e-150	0.363786	0.353	0.034	5.62655e-146	4	Leydig
Tmem234	3.43929e-150	0.39688	0.742	0.145	6.62477e-146	4	Leydig
Uxt	4.55482e-149	1.11403	0.298	0.025	8.7735e-145	4	Leydig
Trp53inp1	5.50423e-149	0.435625	0.317	0.028	1.06022e-144	4	Leydig
Tmed10	8.41901e-148	0.689535	0.829	0.182	1.62167e-143	4	Leydig
Gramd1b	1.18619e-146	0.497945	0.718	0.141	2.28483e-142	4	Leydig
Pkm	4.29378e-146	0.358377	0.722	0.134	8.27067e-142	4	Leydig
Ift20	9.10531e-146	0.75382	0.857	0.206	1.75386e-141	4	Leydig
Ptp4a2	1.38593e-145	0.525468	0.766	0.163	2.66957e-141	4	Leydig
mt-Co1	2.42421e-144	0.585844	0.968	0.324	4.66951e-140	4	Leydig
B4galt1	4.62577e-143	0.802737	0.294	0.025	8.91015e-139	4	Leydig
Atp5g1	1.50566e-142	0.924581	0.798	0.178	2.9002e-138	4	Leydig
App	2.07271e-142	0.494167	0.714	0.135	3.99246e-138	4	Leydig
Rpl15	2.90687e-142	0.353915	0.718	0.139	5.5992e-138	4	Leydig
Hacd2	1.81308e-141	1.25807	0.893	0.246	3.49236e-137	4	Leydig
Rpl14	1.0063e-139	0.830863	0.948	0.265	1.93834e-135	4	Leydig
Atp5j2	4.01969e-138	1.00165	0.913	0.269	7.74273e-134	4	Leydig
Dap	7.63884e-138	0.356998	0.69	0.137	1.47139e-133	4	Leydig
mt-Nd4	1.80243e-137	0.683173	0.992	0.357	3.47185e-133	4	Leydig
Rpl23a	3.1641e-137	0.954866	0.909	0.262	6.09468e-133	4	Leydig
Rps16	4.62857e-137	0.796439	0.857	0.214	8.91555e-133	4	Leydig
Sdf4	7.31244e-137	1.00441	0.857	0.221	1.40852e-132	4	Leydig
mt-Nd5	8.48586e-137	0.602432	0.937	0.272	1.63455e-132	4	Leydig
Txndc15	1.2983e-136	0.843089	0.298	0.027	2.50078e-132	4	Leydig
Rpl6	1.73306e-136	0.729346	0.837	0.211	3.33821e-132	4	Leydig
Slc16a1	3.07919e-136	0.585158	0.349	0.036	5.93114e-132	4	Leydig
Gm13340	2.2989e-135	0.306841	0.262	0.021	4.42814e-131	4	Leydig
Rpl5	3.87761e-135	0.772768	0.742	0.163	7.46905e-131	4	Leydig
H13	5.75253e-135	0.286574	0.671	0.13	1.10805e-130	4	Leydig
Ssbp4	2.13158e-134	1.29549	0.258	0.021	4.10584e-130	4	Leydig
Man2b1	2.50679e-131	0.307741	0.302	0.028	4.82857e-127	4	Leydig
Rps6	1.04005e-130	0.543205	0.813	0.202	2.00334e-126	4	Leydig
Rps3	1.83986e-130	0.834478	0.96	0.288	3.54394e-126	4	Leydig
Cyc1	2.57073e-130	0.443845	0.643	0.118	4.95174e-126	4	Leydig
mt-Nd2	5.39693e-129	0.636975	0.952	0.31	1.03956e-124	4	Leydig
Rpl27	8.09215e-129	0.63793	0.841	0.222	1.55871e-124	4	Leydig
Atf5	8.44538e-129	0.897304	0.254	0.021	1.62675e-124	4	Leydig
Prdx5	1.20768e-128	0.792301	0.841	0.218	2.32623e-124	4	Leydig
Rps2	1.4862e-128	0.842923	0.921	0.277	2.86272e-124	4	Leydig
Rps8	3.71928e-128	0.987642	0.944	0.312	7.16409e-124	4	Leydig
Ndufa10	1.6552e-125	0.304103	0.706	0.149	3.18824e-121	4	Leydig
Slc41a1	1.98049e-125	0.79919	0.266	0.023	3.81481e-121	4	Leydig
Rpl19	9.78974e-125	0.749327	0.849	0.235	1.8857e-120	4	Leydig
Gm6265	3.18374e-124	1.13277	0.254	0.021	6.13251e-120	4	Leydig
Rack1	3.02889e-123	0.69746	0.845	0.211	5.83424e-119	4	Leydig
Oaz1	4.64213e-123	0.577964	0.746	0.164	8.94166e-119	4	Leydig
Rsrp1	1.05461e-122	0.290585	0.881	0.227	2.0314e-118	4	Leydig
Rab14	3.14407e-122	0.414746	0.738	0.16	6.0561e-118	4	Leydig
Ssu72	5.61523e-122	0.331198	0.552	0.094	1.08161e-117	4	Leydig
Smdt1	2.70389e-121	0.429071	0.75	0.17	5.20824e-117	4	Leydig
Ndufb9	8.4936e-121	0.824404	0.937	0.3	1.63604e-116	4	Leydig
mt-Cytb	2.00061e-120	0.769339	0.996	0.43	3.85358e-116	4	Leydig
Fuca1	9.81202e-120	0.62035	0.722	0.168	1.88999e-115	4	Leydig
mt-Nd1	3.79659e-119	0.701221	0.996	0.463	7.313e-115	4	Leydig
Chchd2	4.70631e-119	0.892363	0.98	0.417	9.0653e-115	4	Leydig
Rps19	4.50093e-118	0.881715	0.913	0.294	8.6697e-114	4	Leydig
Elovl6	4.50355e-118	0.756683	0.306	0.032	8.67474e-114	4	Leydig
Zmat5	1.26124e-117	1.80234	0.444	0.066	2.42941e-113	4	Leydig
Vcp	7.76999e-115	0.328237	0.762	0.179	1.49665e-110	4	Leydig
Rps21	8.34181e-115	0.678981	0.893	0.264	1.6068e-110	4	Leydig
Eef1b2	3.11822e-113	0.571209	0.853	0.234	6.00631e-109	4	Leydig
Gm2a	2.47388e-112	0.339732	0.778	0.187	4.76518e-108	4	Leydig
Ppia	5.08878e-112	0.918297	0.925	0.323	9.80201e-108	4	Leydig
Sod1	7.9888e-112	1.16142	0.968	0.387	1.5388e-107	4	Leydig
C1qbp	3.09526e-110	0.337516	0.532	0.095	5.96209e-106	4	Leydig
Agfg2	8.48814e-110	0.495562	0.282	0.029	1.63499e-105	4	Leydig
Ndufb6	9.50395e-110	0.496074	0.798	0.204	1.83065e-105	4	Leydig
Rpl3	2.33401e-109	0.624711	0.869	0.248	4.49577e-105	4	Leydig
Atp5h	4.27654e-109	0.918539	0.921	0.34	8.23748e-105	4	Leydig
Rpsa	2.30391e-108	0.482079	0.829	0.233	4.4378e-104	4	Leydig
Psmb1	5.95728e-108	0.603189	0.921	0.272	1.14749e-103	4	Leydig
Rps27a	1.36069e-107	0.627657	0.925	0.284	2.62096e-103	4	Leydig
Rps3a1	8.11389e-107	0.578144	0.742	0.182	1.5629e-102	4	Leydig
Uqcrb	1.44471e-105	0.75062	0.81	0.233	2.7828e-101	4	Leydig
Psmb2	2.82383e-105	0.272539	0.722	0.169	5.43925e-101	4	Leydig
Rps10	1.18957e-104	0.693197	0.837	0.249	2.29135e-100	4	Leydig
Hsp90ab1	2.39568e-104	0.557988	0.988	0.405	4.61456e-100	4	Leydig
Rpl17	2.49894e-104	0.749012	0.841	0.257	4.81345e-100	4	Leydig
Uba52	3.50905e-104	0.398077	0.631	0.14	6.75913e-100	4	Leydig
2210016F16Rik	7.52394e-104	0.257087	0.317	0.039	1.44926e-99	4	Leydig
Cox6c	1.22283e-102	0.878849	0.956	0.412	2.35541e-98	4	Leydig
Atp5a1	1.2982e-102	0.714114	0.881	0.278	2.5006e-98	4	Leydig
Rps18	8.89072e-102	0.848627	0.917	0.345	1.71253e-97	4	Leydig
Uqcrh	1.5772e-101	0.609829	0.865	0.257	3.03801e-97	4	Leydig
Fasn	1.7033e-100	0.551177	0.282	0.032	3.2809e-96	4	Leydig
Psma3	2.02872e-100	0.443327	0.635	0.144	3.90773e-96	4	Leydig
Pomp	4.53253e-100	0.304985	0.706	0.171	8.73055e-96	4	Leydig
Rps27	2.04603e-99	0.787196	0.897	0.32	3.94106e-95	4	Leydig
Rpl35	2.4021e-97	0.51937	0.73	0.198	4.62692e-93	4	Leydig
Rpl9	5.65154e-97	0.613006	0.869	0.276	1.0886e-92	4	Leydig
Rpl27a	5.143e-96	0.561439	0.766	0.219	9.90645e-92	4	Leydig
Ndufb2	4.7494e-95	0.254095	0.655	0.159	9.1483e-91	4	Leydig
Erlec1	5.64512e-95	0.615616	0.738	0.201	1.08736e-90	4	Leydig
Gas5	1.65167e-94	0.277313	0.71	0.182	3.18145e-90	4	Leydig
Rpl21	5.62054e-94	0.645085	0.861	0.302	1.08263e-89	4	Leydig
Rpl23	1.26663e-93	0.824813	0.933	0.374	2.43977e-89	4	Leydig
Sec13	5.03235e-92	0.338681	0.611	0.145	9.69332e-88	4	Leydig
Rplp2	5.39893e-92	0.557008	0.94	0.373	1.03994e-87	4	Leydig
Atp5k	1.52433e-91	0.296951	0.679	0.172	2.93616e-87	4	Leydig
Rps23	3.60496e-91	0.557621	0.885	0.312	6.94388e-87	4	Leydig
Rpl31	7.76705e-91	0.583801	0.853	0.276	1.49609e-86	4	Leydig
Rps11	1.61258e-90	0.524117	0.913	0.328	3.10615e-86	4	Leydig
Rplp1	2.05248e-90	0.791278	0.996	0.507	3.9535e-86	4	Leydig
Card19	1.97321e-89	0.407899	0.31	0.042	3.8008e-85	4	Leydig
mt-Nd6	2.11551e-88	0.879103	0.393	0.065	4.0749e-84	4	Leydig
Rpl38	6.6618e-88	0.607452	0.813	0.264	1.2832e-83	4	Leydig
Sdhb	4.70553e-87	0.6426	0.829	0.275	9.06379e-83	4	Leydig
Rps27l	3.79717e-86	0.58746	0.821	0.267	7.31411e-82	4	Leydig
Surf4	8.78693e-86	0.631998	0.694	0.184	1.69254e-81	4	Leydig
Rpl11	8.83505e-86	0.724897	0.933	0.42	1.70181e-81	4	Leydig
Rabac1	3.79396e-85	0.62323	0.845	0.284	7.30793e-81	4	Leydig
Hint1	8.82695e-85	0.710553	0.933	0.365	1.70025e-80	4	Leydig
Atpif1	1.70455e-82	0.749701	0.96	0.463	3.28331e-78	4	Leydig
Ubl5	4.12125e-82	0.441389	0.73	0.217	7.93836e-78	4	Leydig
Laptm4a	4.49418e-82	0.671671	0.933	0.399	8.65669e-78	4	Leydig
Park7	9.68385e-82	0.358882	0.774	0.235	1.8653e-77	4	Leydig
Ost4	2.18018e-81	0.276766	0.623	0.162	4.19946e-77	4	Leydig
Rpl37a	3.42633e-80	0.588745	0.857	0.313	6.5998e-76	4	Leydig
Rps17	5.38458e-80	0.680255	0.901	0.347	1.03718e-75	4	Leydig
Tpt1	9.24183e-80	0.932583	0.893	0.382	1.78016e-75	4	Leydig
Rps9	1.6648e-79	0.676696	0.925	0.393	3.20674e-75	4	Leydig
Rpl28	2.35447e-79	0.258133	0.683	0.195	4.53518e-75	4	Leydig
Atp5b	3.24915e-79	0.704459	0.952	0.437	6.25852e-75	4	Leydig
Psmb4	9.75727e-79	0.412164	0.861	0.289	1.87945e-74	4	Leydig
Cox5b	4.91197e-77	0.563199	0.849	0.314	9.46144e-73	4	Leydig
Rpl7	9.71703e-77	0.33977	0.794	0.259	1.87169e-72	4	Leydig
Rpl37	9.53744e-75	0.714197	0.889	0.358	1.8371e-70	4	Leydig
Fau	6.21968e-74	0.546019	0.909	0.379	1.19803e-69	4	Leydig
Rrbp1	8.71759e-74	0.258609	0.837	0.293	1.67918e-69	4	Leydig
Ergic3	1.71862e-73	0.304817	0.718	0.219	3.31041e-69	4	Leydig
Rpl18	2.16562e-73	0.526719	0.889	0.349	4.17142e-69	4	Leydig
Atp5j	5.72686e-73	0.638483	0.933	0.425	1.10311e-68	4	Leydig
Ndufa6	2.28025e-71	0.529897	0.889	0.353	4.39222e-67	4	Leydig
Ndufa2	3.49484e-71	0.508102	0.869	0.337	6.73175e-67	4	Leydig
Rpl7a	3.87383e-71	0.341788	0.817	0.281	7.46177e-67	4	Leydig
Rps5	3.95031e-71	0.585247	0.948	0.426	7.60908e-67	4	Leydig
Capns1	5.39015e-71	0.619856	0.901	0.359	1.03825e-66	4	Leydig
Cnbp	1.3594e-70	0.375843	0.849	0.287	2.61848e-66	4	Leydig
Rpl35a	3.38489e-70	0.39795	0.754	0.254	6.51998e-66	4	Leydig
Rpl18a	1.42988e-69	0.440721	0.897	0.366	2.75424e-65	4	Leydig
Tmem9	7.68217e-69	0.369043	0.266	0.039	1.47974e-64	4	Leydig
Cox7c	1.90557e-68	0.403574	0.798	0.289	3.67052e-64	4	Leydig
Rps14	6.27078e-68	0.594362	0.988	0.626	1.20788e-63	4	Leydig
Ndufb8	2.14279e-67	0.596378	0.909	0.406	4.12743e-63	4	Leydig
Rps15	1.10896e-66	0.460259	0.845	0.324	2.13608e-62	4	Leydig
Swi5	8.18871e-66	0.492378	0.865	0.333	1.57731e-61	4	Leydig
Rpl36	1.45189e-64	0.41954	0.825	0.317	2.79664e-60	4	Leydig
Dad1	5.589e-64	0.532226	0.897	0.372	1.07655e-59	4	Leydig
Serf2	1.96381e-63	0.330256	0.722	0.246	3.78269e-59	4	Leydig
Rps25	4.51135e-62	0.563894	0.857	0.359	8.68976e-58	4	Leydig
Atp5c1	3.25985e-60	0.347333	0.829	0.316	6.27913e-56	4	Leydig
Rps13	9.39172e-60	0.353231	0.889	0.38	1.80903e-55	4	Leydig
Atp5e	1.79272e-59	0.304066	0.825	0.313	3.45313e-55	4	Leydig
Ndufa13	2.13904e-57	0.394137	0.849	0.347	4.12022e-53	4	Leydig
Rpl4	5.54465e-56	0.388719	0.913	0.396	1.06801e-51	4	Leydig
Rps29	2.36531e-53	0.327744	0.782	0.309	4.55606e-49	4	Leydig
Rpl13	2.66735e-52	0.461038	0.96	0.522	5.13785e-48	4	Leydig
Rpl41	1.40946e-51	0.485416	0.937	0.502	2.71491e-47	4	Leydig
Mt1	1.77037e-51	1.07456	0.96	0.583	3.41008e-47	4	Leydig
Atp5f1	4.69382e-51	0.289956	0.806	0.305	9.04124e-47	4	Leydig
Cox4i1	5.31322e-51	0.431672	0.976	0.551	1.02343e-46	4	Leydig
Eef1a1	1.62497e-49	0.40276	0.901	0.441	3.13002e-45	4	Leydig
Ndufa7	4.35084e-47	0.299992	0.861	0.375	8.38059e-43	4	Leydig
Rpl30	4.42606e-45	0.330384	0.778	0.346	8.52547e-41	4	Leydig
Rps15a	2.31647e-43	0.371212	0.869	0.407	4.46199e-39	4	Leydig
Ubc	9.96009e-43	0.418459	0.865	0.443	1.91851e-38	4	Leydig
Rps26	4.37047e-42	0.362076	0.865	0.394	8.41841e-38	4	Leydig
Rpl32	5.46434e-42	0.369773	0.98	0.562	1.05254e-37	4	Leydig
Cd63	5.99275e-39	1.00014	0.413	0.131	1.15432e-34	4	Leydig
Mt2	1.98458e-25	0.298059	0.742	0.344	3.82269e-21	4	Leydig
Cebpz	1.30048e-13	0.299264	0.306	0.13	2.50498e-09	4	Leydig
Ly6k	0.00136497	0.883035	0.349	0.252	1	4	Leydig
Snhg11	0	5.75761	0.514	0.03	0	5	Leydig
Hsd17b3	0	5.03046	0.542	0.025	0	5	Leydig
Malat1	0	4.81753	0.97	0.473	0	5	Leydig
Tmem176a	0	4.69848	0.713	0.042	0	5	Leydig
Ephx1	0	4.60268	0.71	0.036	0	5	Leydig
Lrg1	0	4.57017	0.507	0.029	0	5	Leydig
Agt	0	4.54392	0.833	0.086	0	5	Leydig
Lcn2	0	4.49304	0.948	0.134	0	5	Leydig
Pcolce	0	4.42777	0.645	0.061	0	5	Leydig
Apoc1	0	4.42681	0.635	0.051	0	5	Leydig
Cyp11a1	0	4.41629	0.672	0.047	0	5	Leydig
Pon3	0	4.41136	0.351	0.017	0	5	Leydig
Cyp17a1	0	4.36013	0.923	0.104	0	5	Leydig
Cd36	0	4.35956	0.457	0.027	0	5	Leydig
Tmem176b	0	4.32696	0.648	0.039	0	5	Leydig
Msmo1	0	4.31263	0.574	0.044	0	5	Leydig
Aldh1a1	0	4.27272	0.696	0.084	0	5	Leydig
Folr1	0	4.26784	0.461	0.035	0	5	Leydig
Gm37376	0	4.24845	0.355	0.033	0	5	Leydig
Ces1d	0	4.23939	0.52	0.027	0	5	Leydig
[truncated: 13,604 more rows]
