# Supplementary material for: Unified single-cell analysis of testis gene regulation and pathology in five mouse strains
Source: eLife journal article supplement (doi:10.7554/elife.43966), 2019-06-25
Supplement: supp [file elife-43966-supp-v1.zip › elife_poa_e43966_Supplementary_file_7.xlsx]

## Sheet: Sheet1
Table S5 - Summary of SDA runtime and memory usage for example datasets.
Run name	Data Type	# Cells	# UMIs	# Genes	# Components	# Iterations	CPU time*	Memory Usage*
Mouse	DropSeq	20322	50278390	19262	25	10000	36 hours	9.2GB
Mouse	DropSeq	20322	50278390	19262	50	10000	59 hours	9.3GB
Mouse	DropSeq	20322	50278390	19262	70	10000	72 hours	9.3GB
Human	10X Genomics	15521	182942716	18589	50	10000	48 hours	7.0GB
Human	10X Genomics	15521	182942716	18589	70	10000	57 hours	7.0GB
Human	10X Genomics	15521	182942716	18589	100	10000	67 hours	7.1GB
*average of 5 SDA run results on a variety of 2.20 GHz-3.00 GHz processors
**These SDA runs were not performed with parallel computation
