# Supplementary figures and images for: Unified single-cell analysis of testis gene regulation and pathology in five mouse strains
Source: eLife journal article supplement (doi:10.7554/elife.43966), 2019-06-25

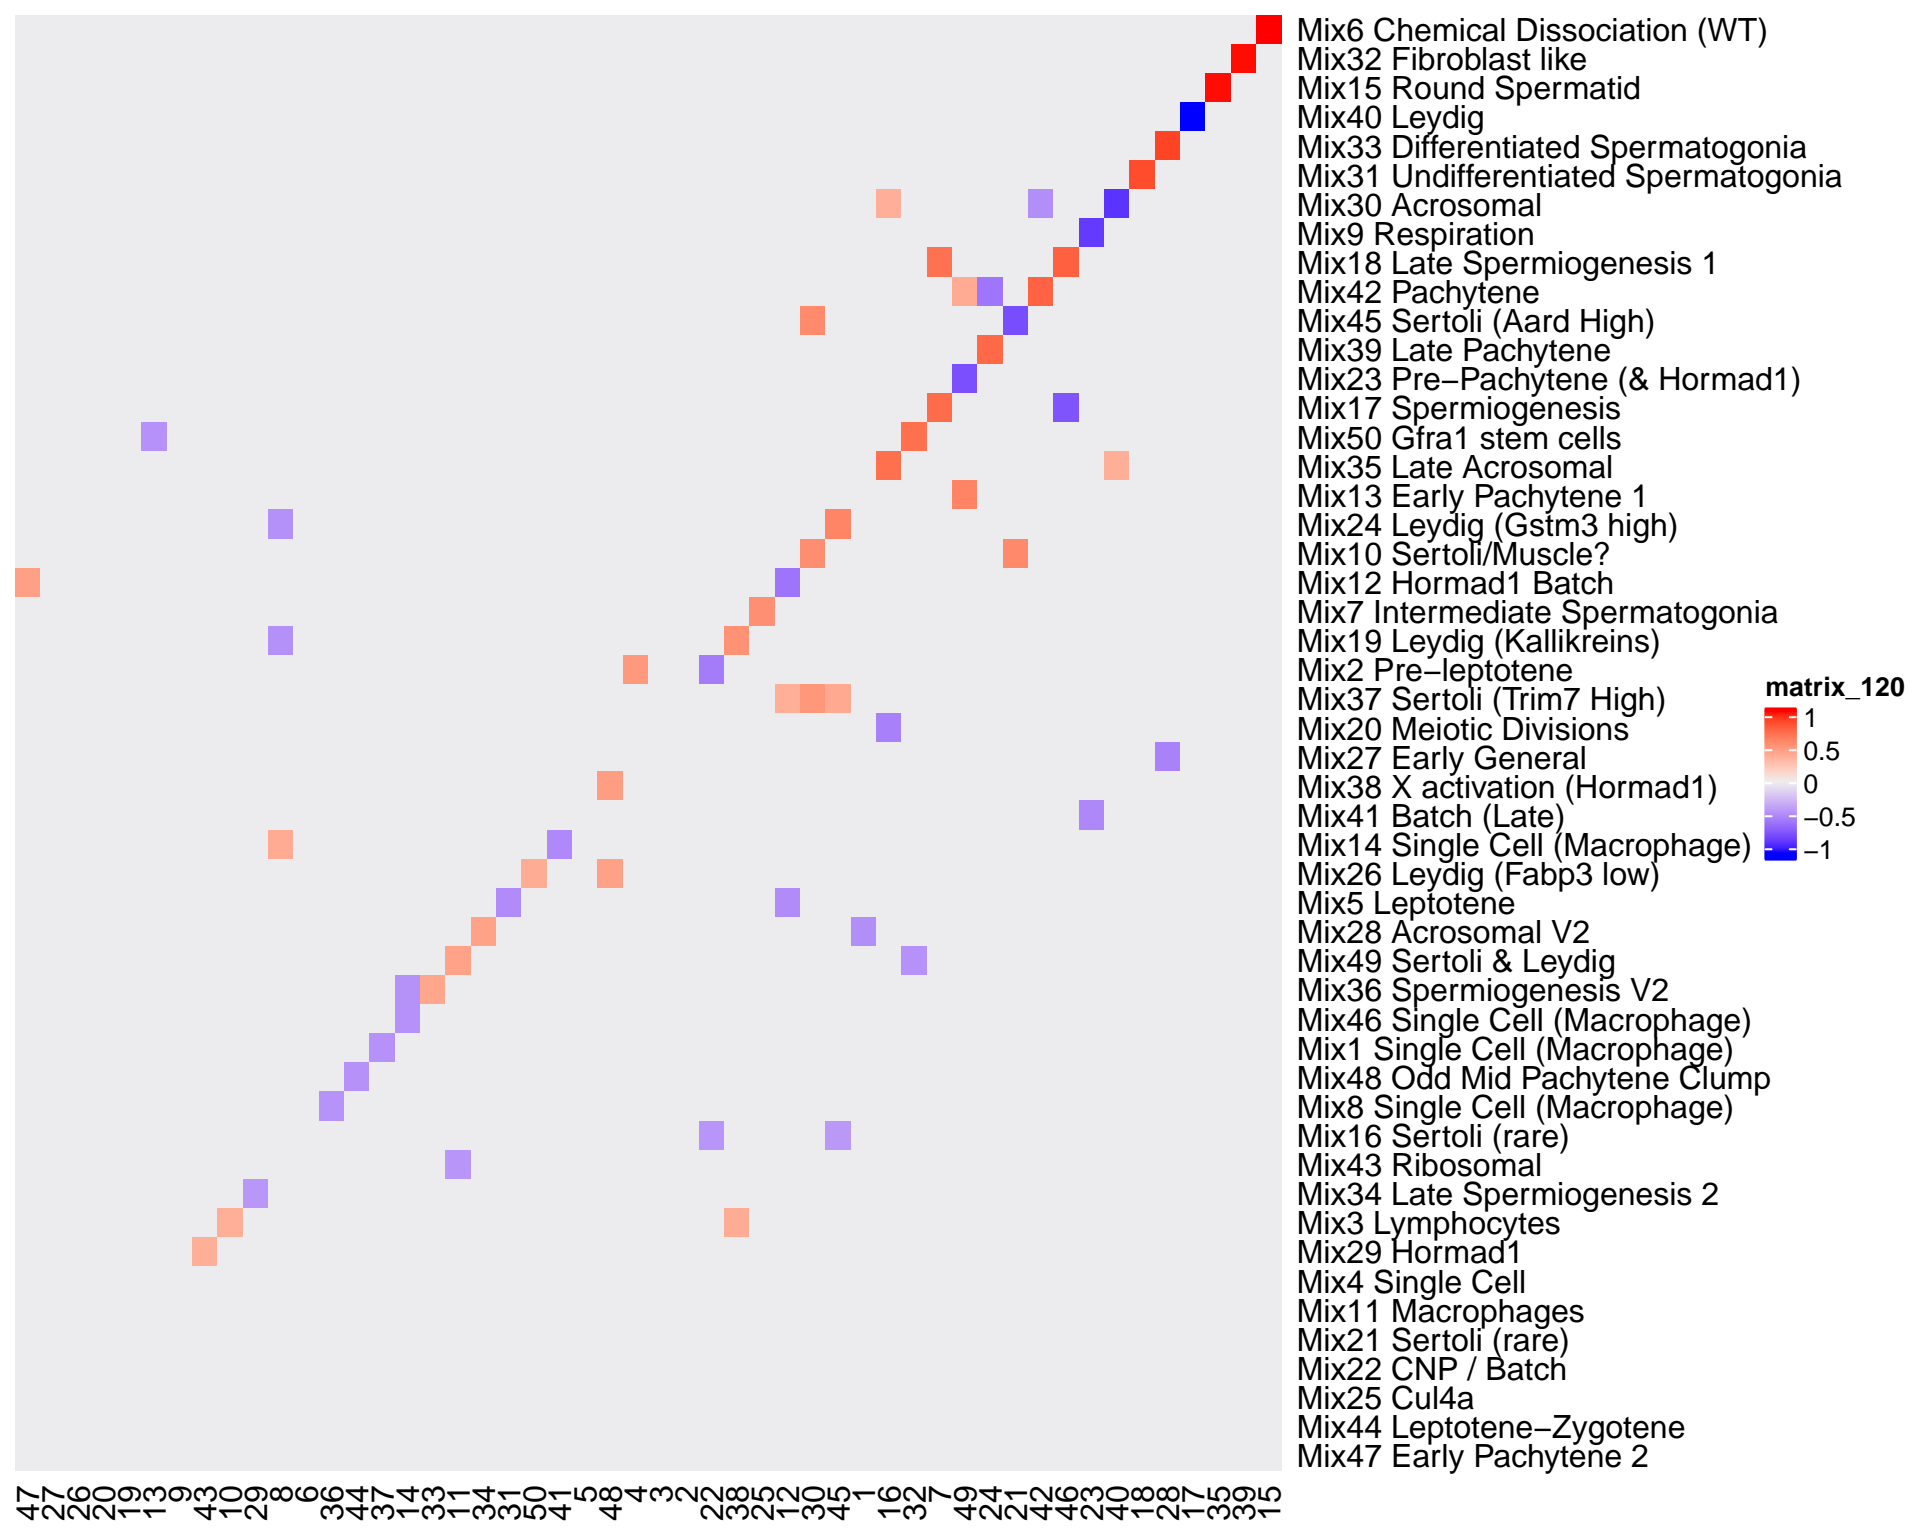

Supplement: supp [file elife-43966-supp-v1.zip › elife_poa_e43966_Figure_3_figure_supplement_3.pdf]

**A**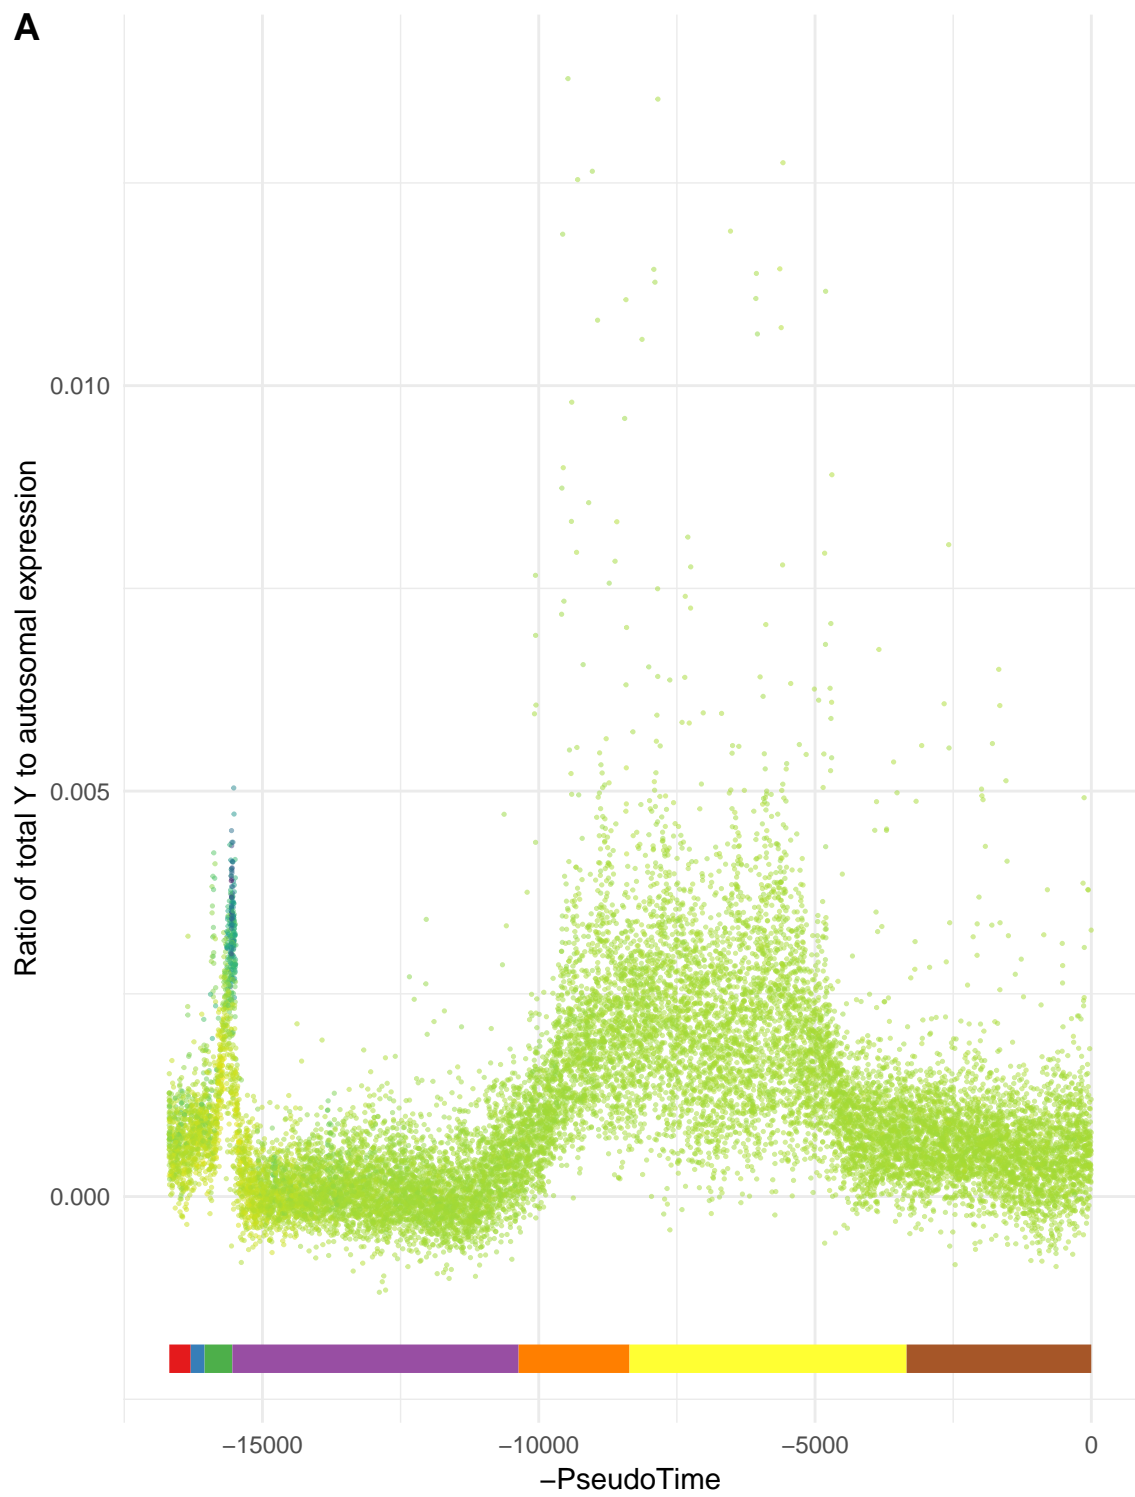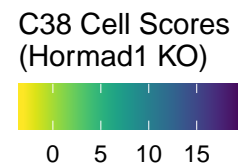**Stage**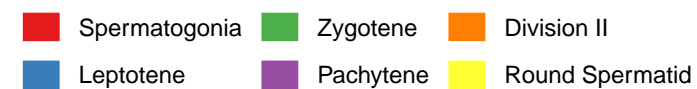**B**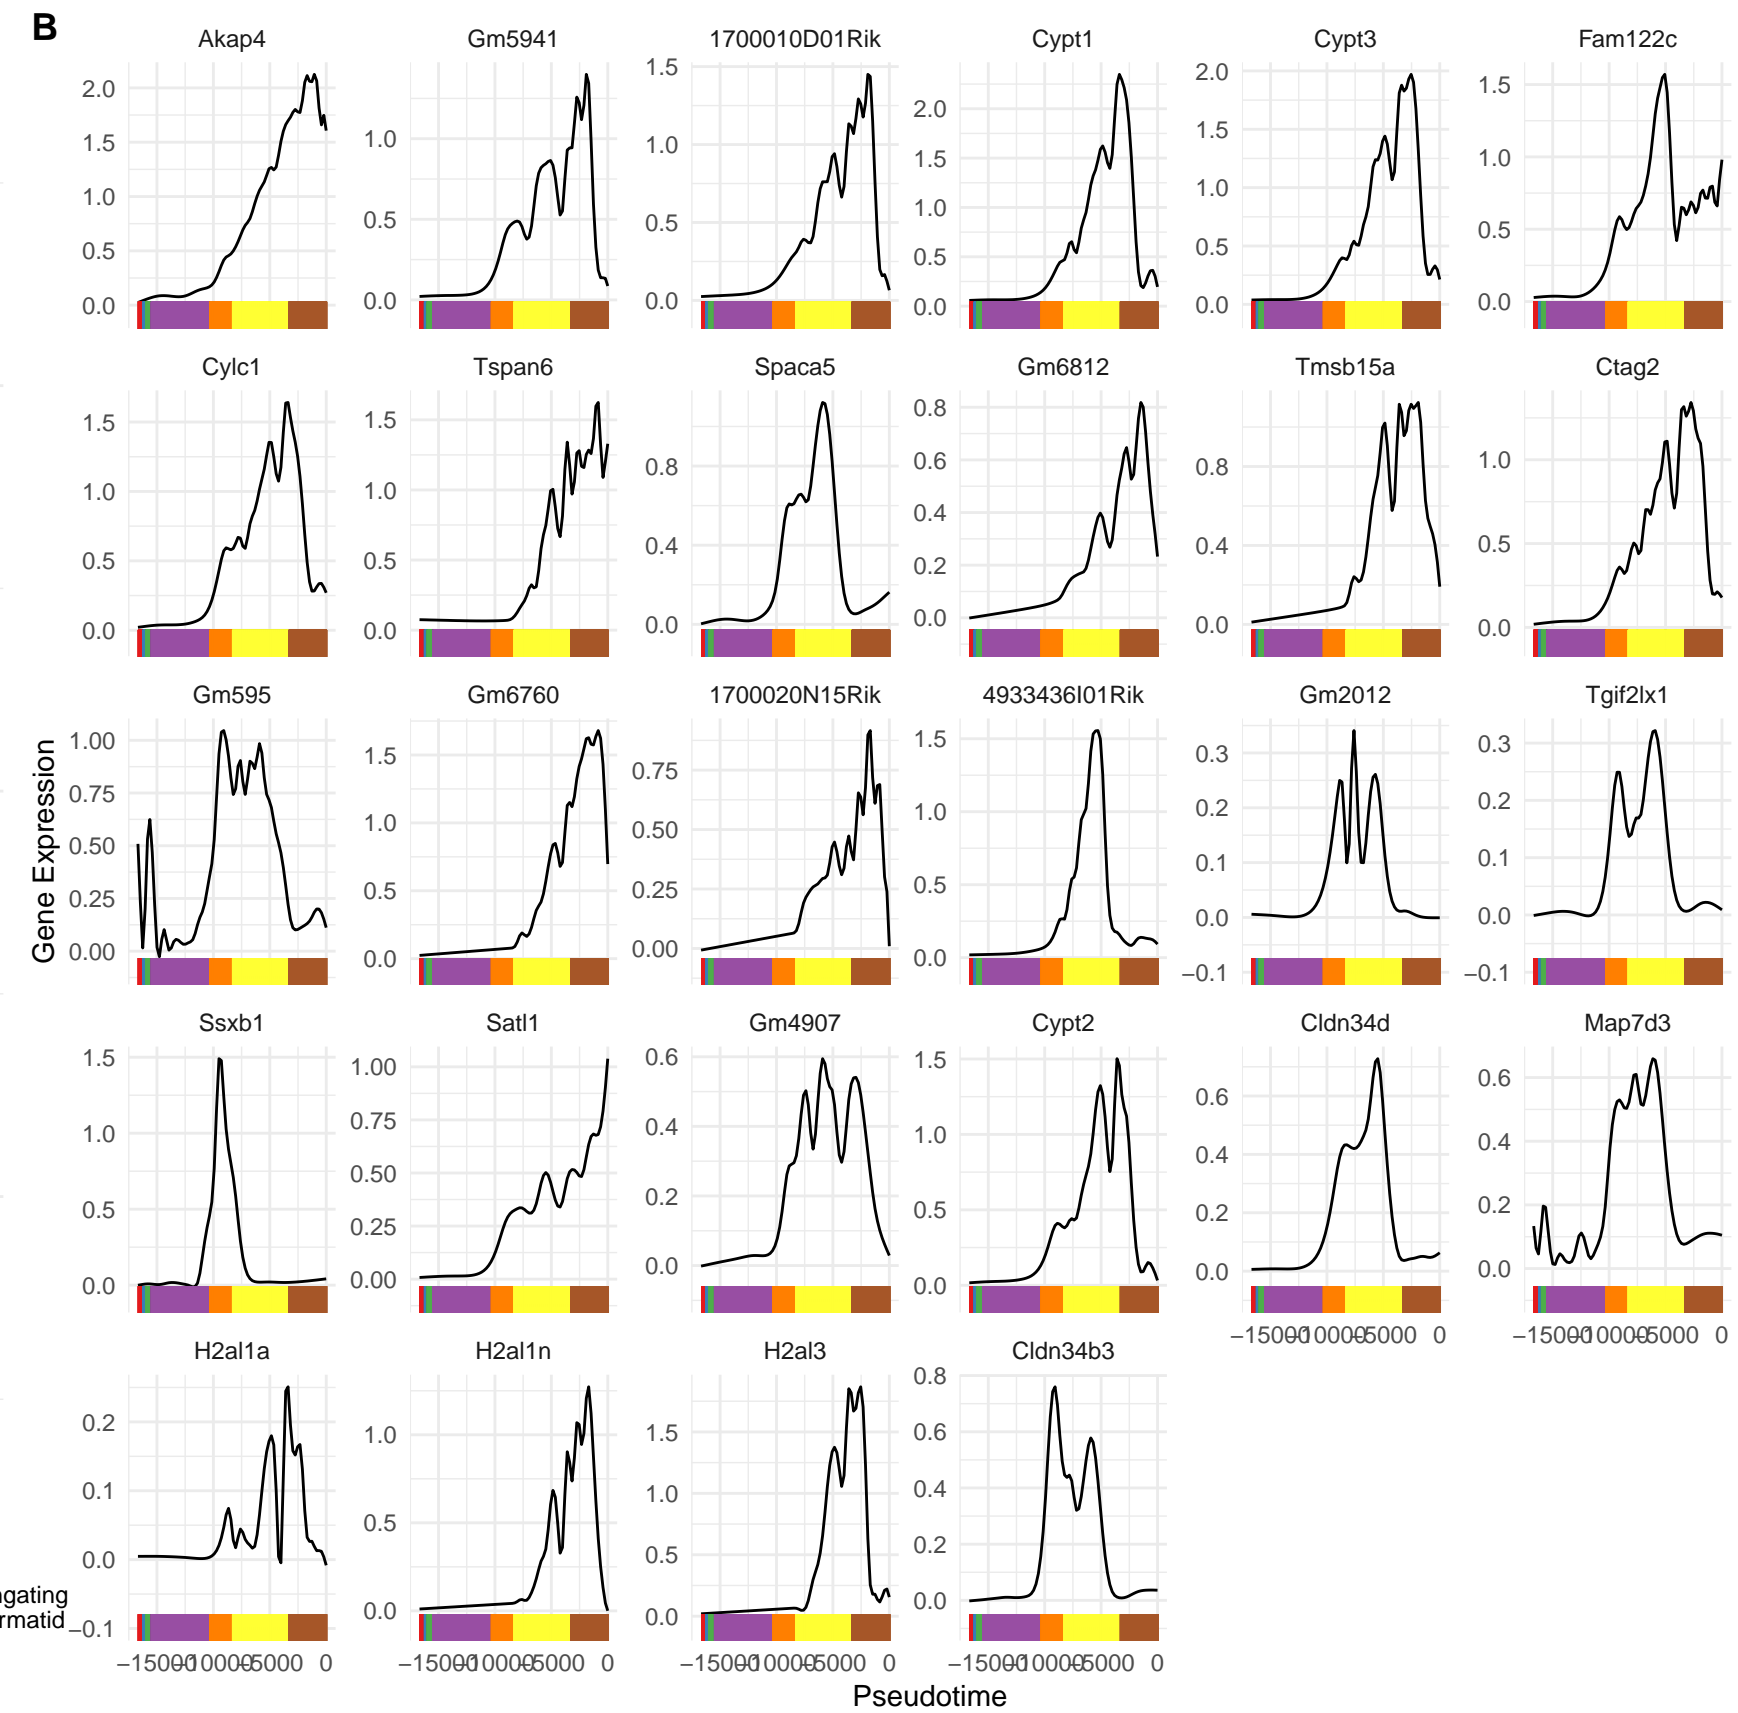

Supplement: supp [file elife-43966-supp-v1.zip › elife_poa_e43966_Figure_6_figure_supplement_1.pdf]

**A****Random Seed: 262279 (rotated -165°)**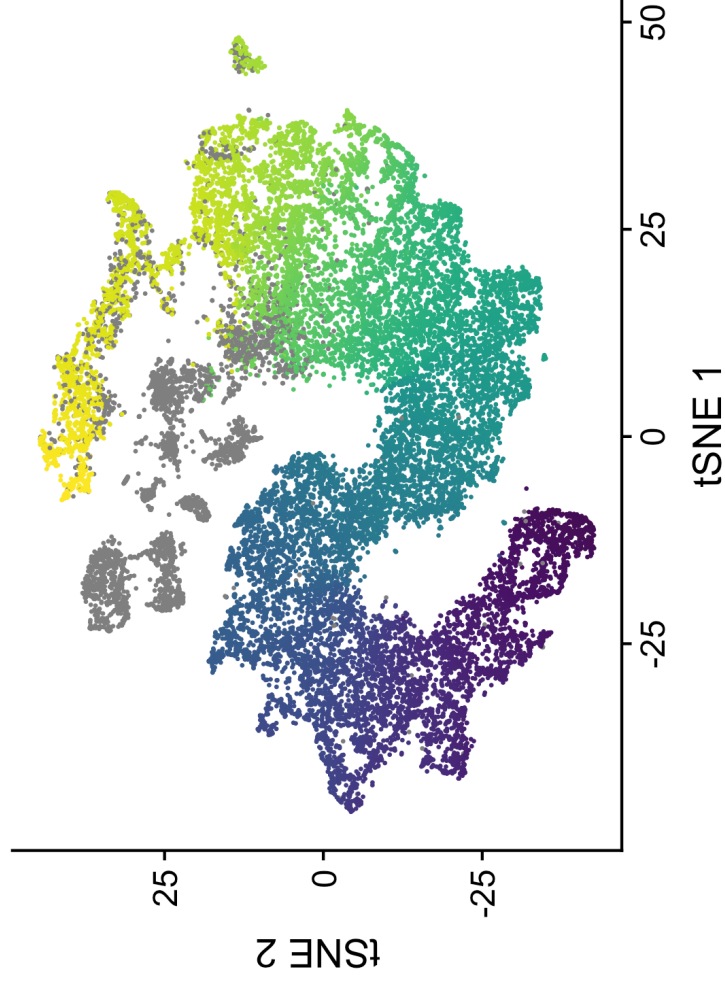**B****Random Seed: 225666 (rotated -50°)**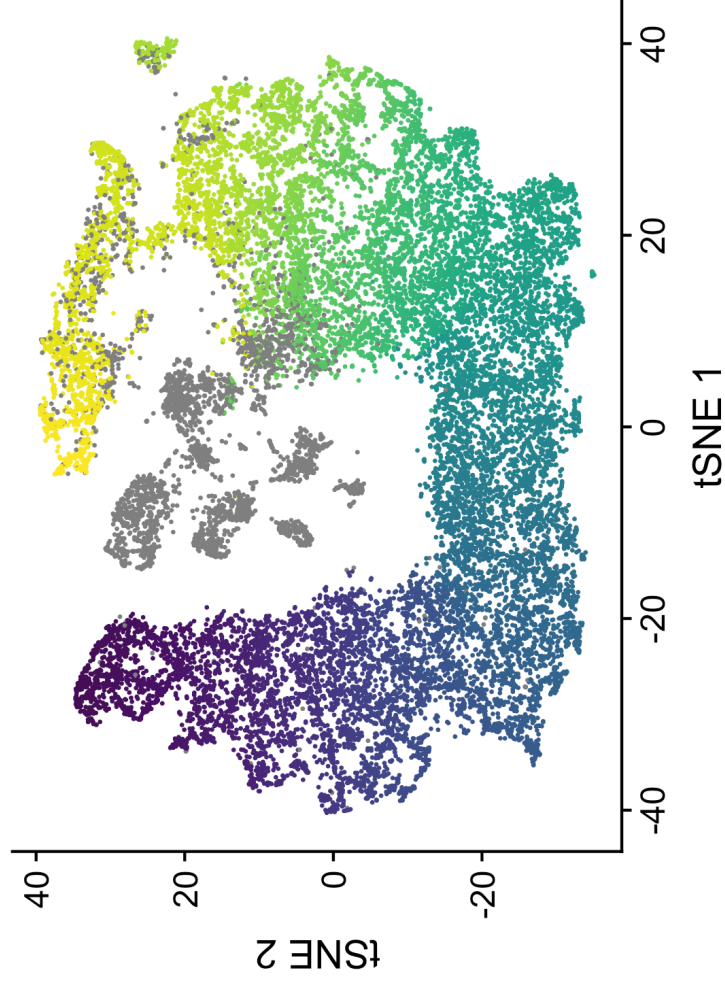**C****Random Seed: 648670 (rotated 45°)**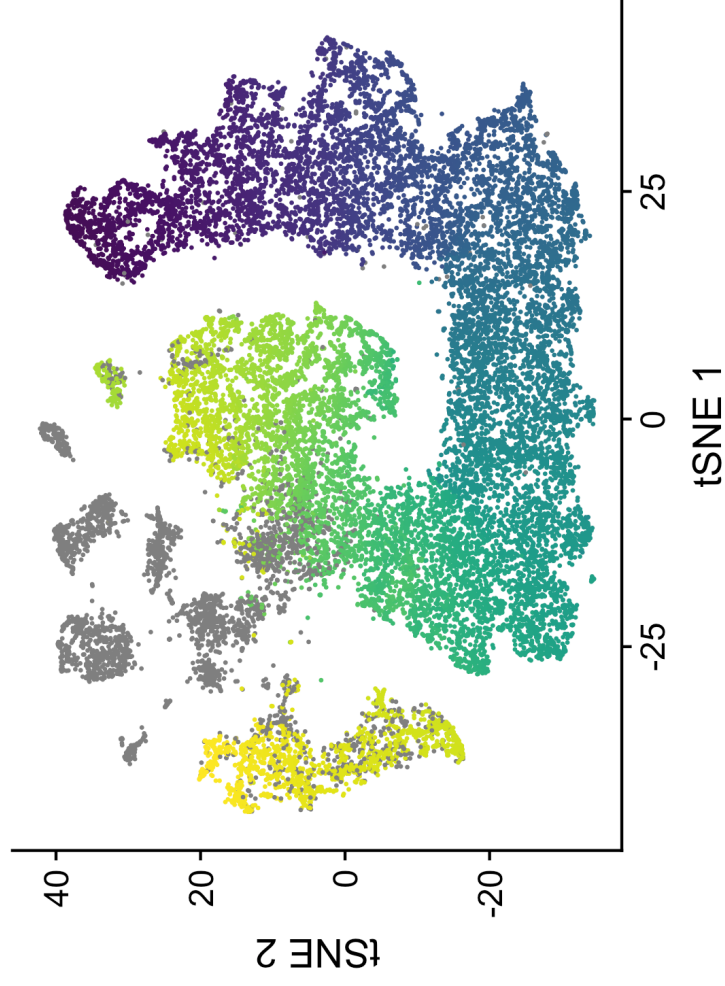**D****UMAP, Random Seed: 116189**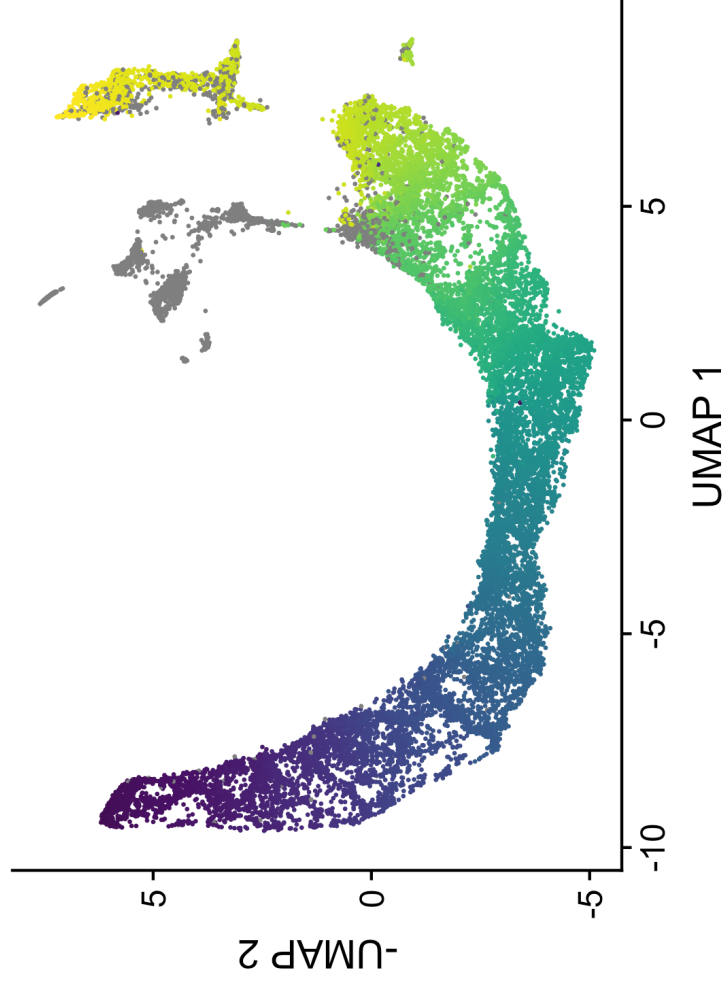

Supplement: supp [file elife-43966-supp-v1.zip › elife_poa_e43966_Figure_3_figure_supplement_5.pdf]

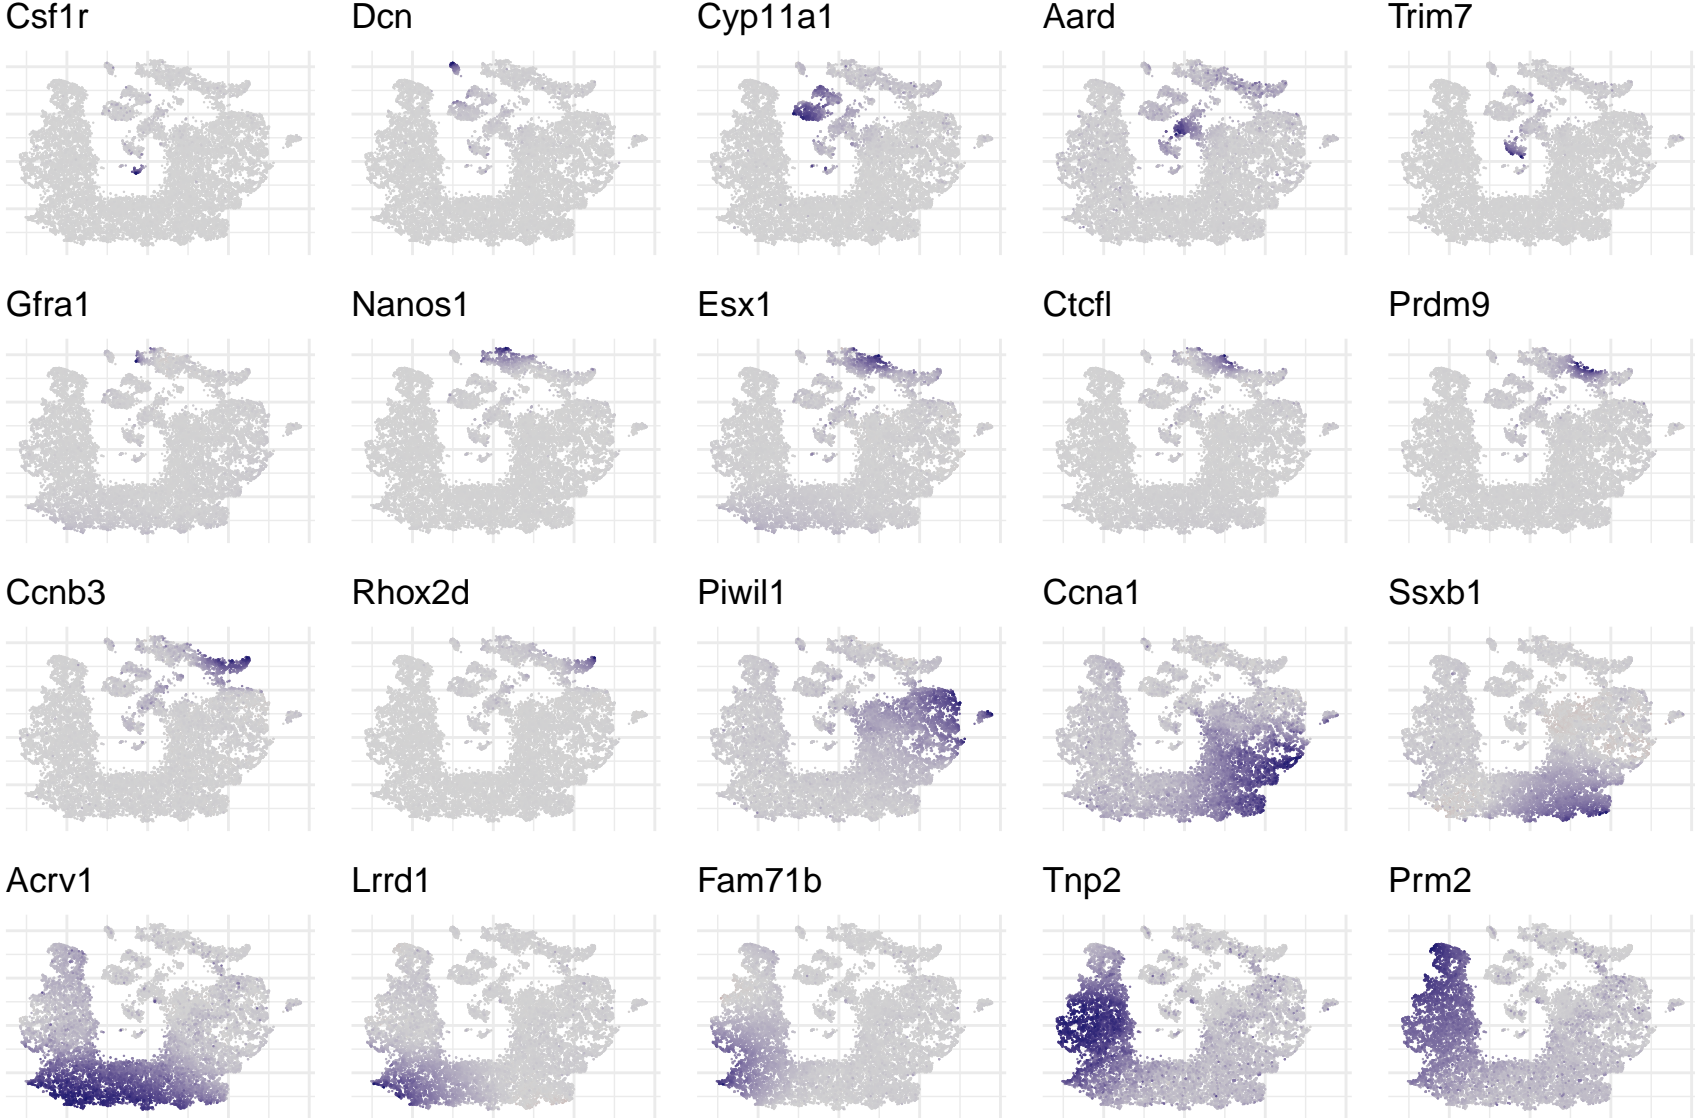

Supplement: supp [file elife-43966-supp-v1.zip › elife_poa_e43966_Figure_1_figure_supplement_3.pdf]

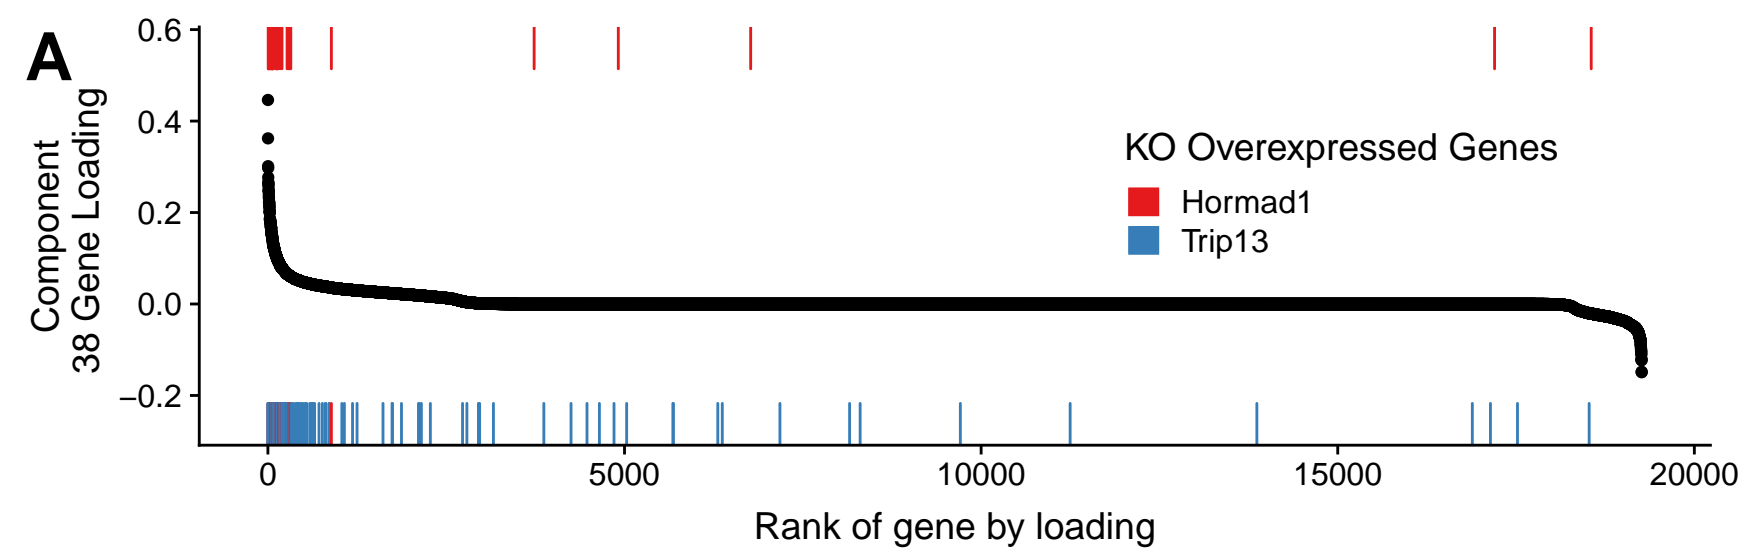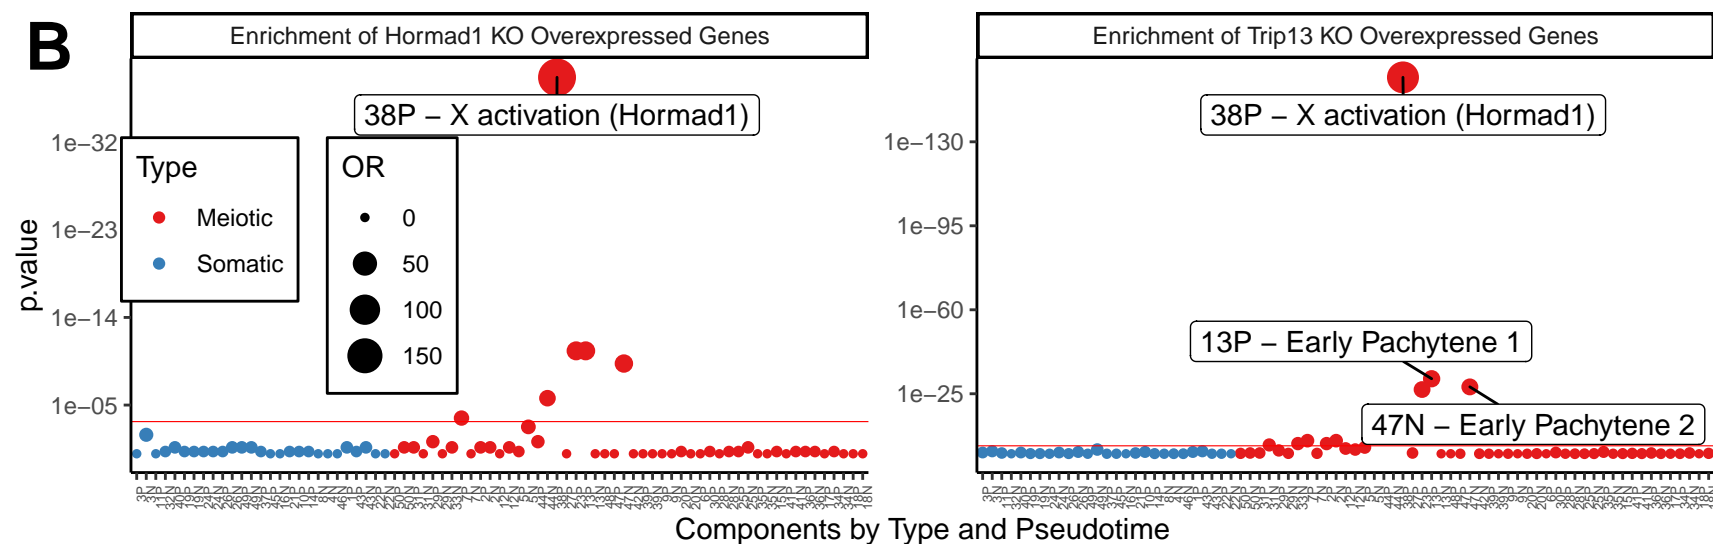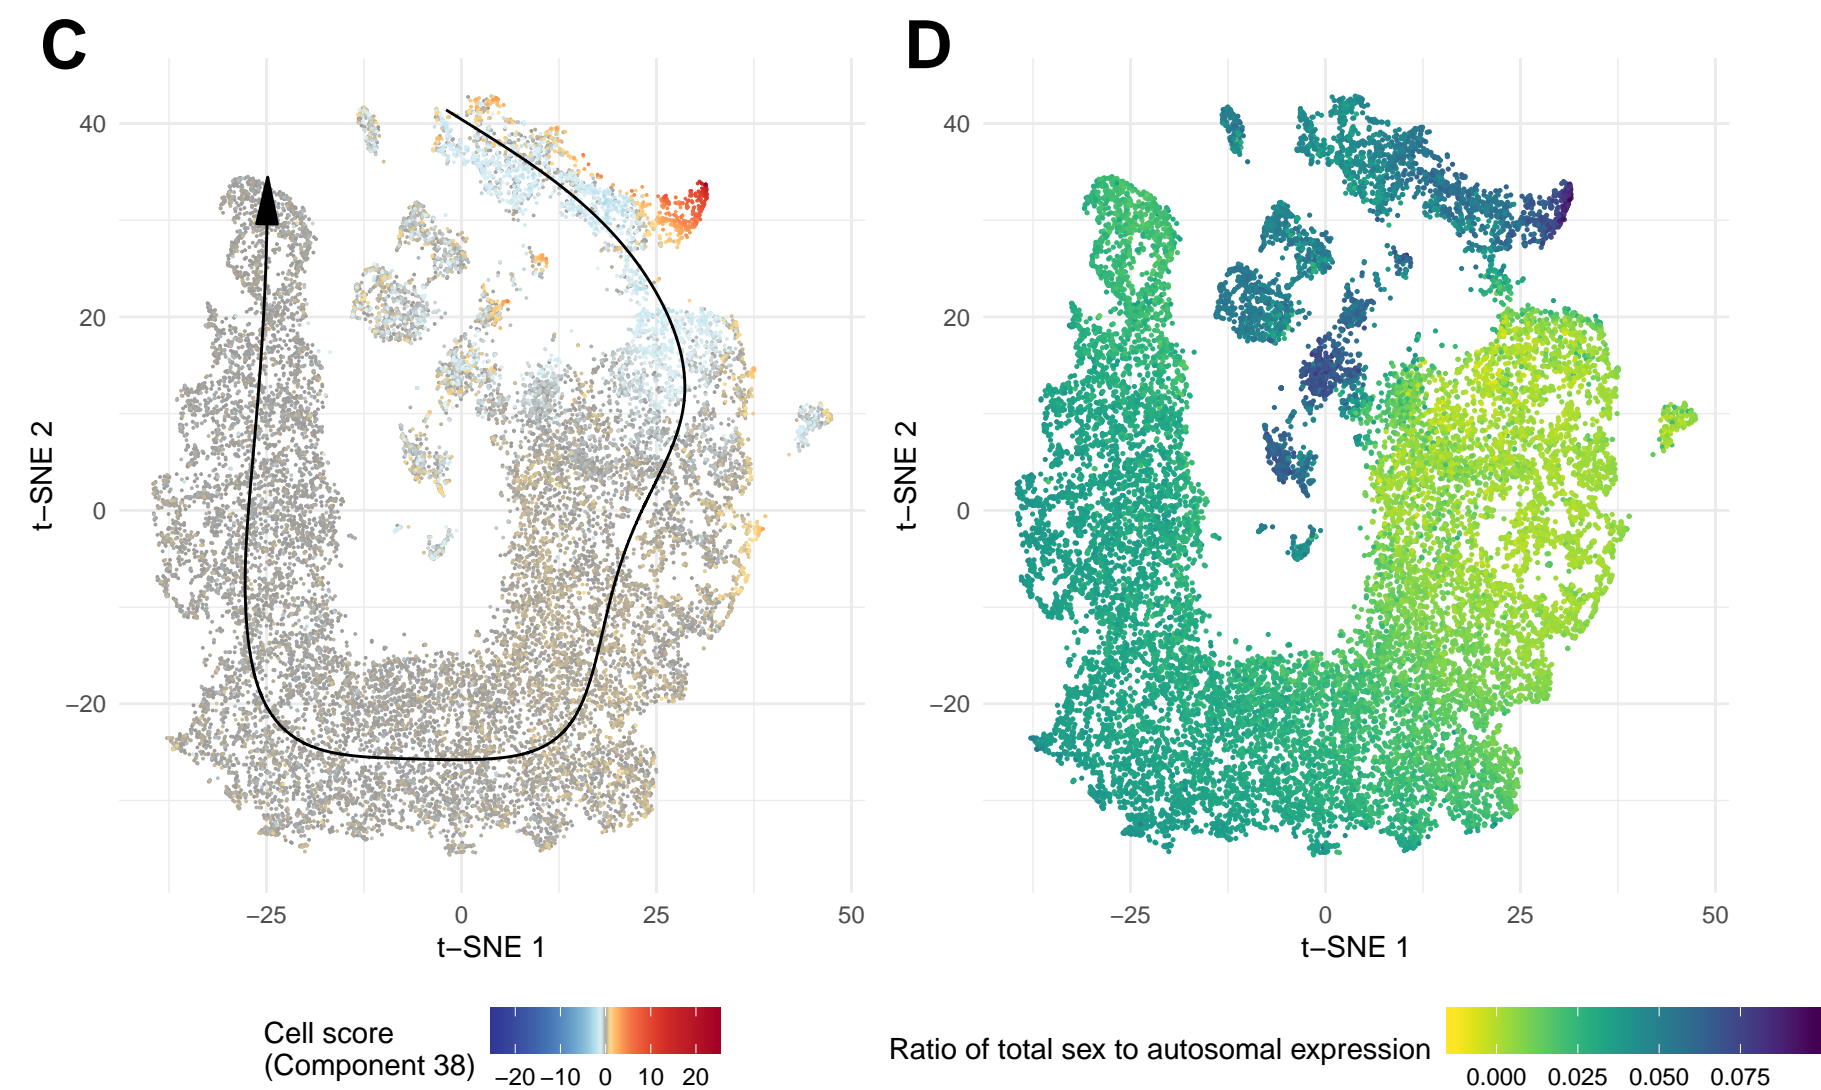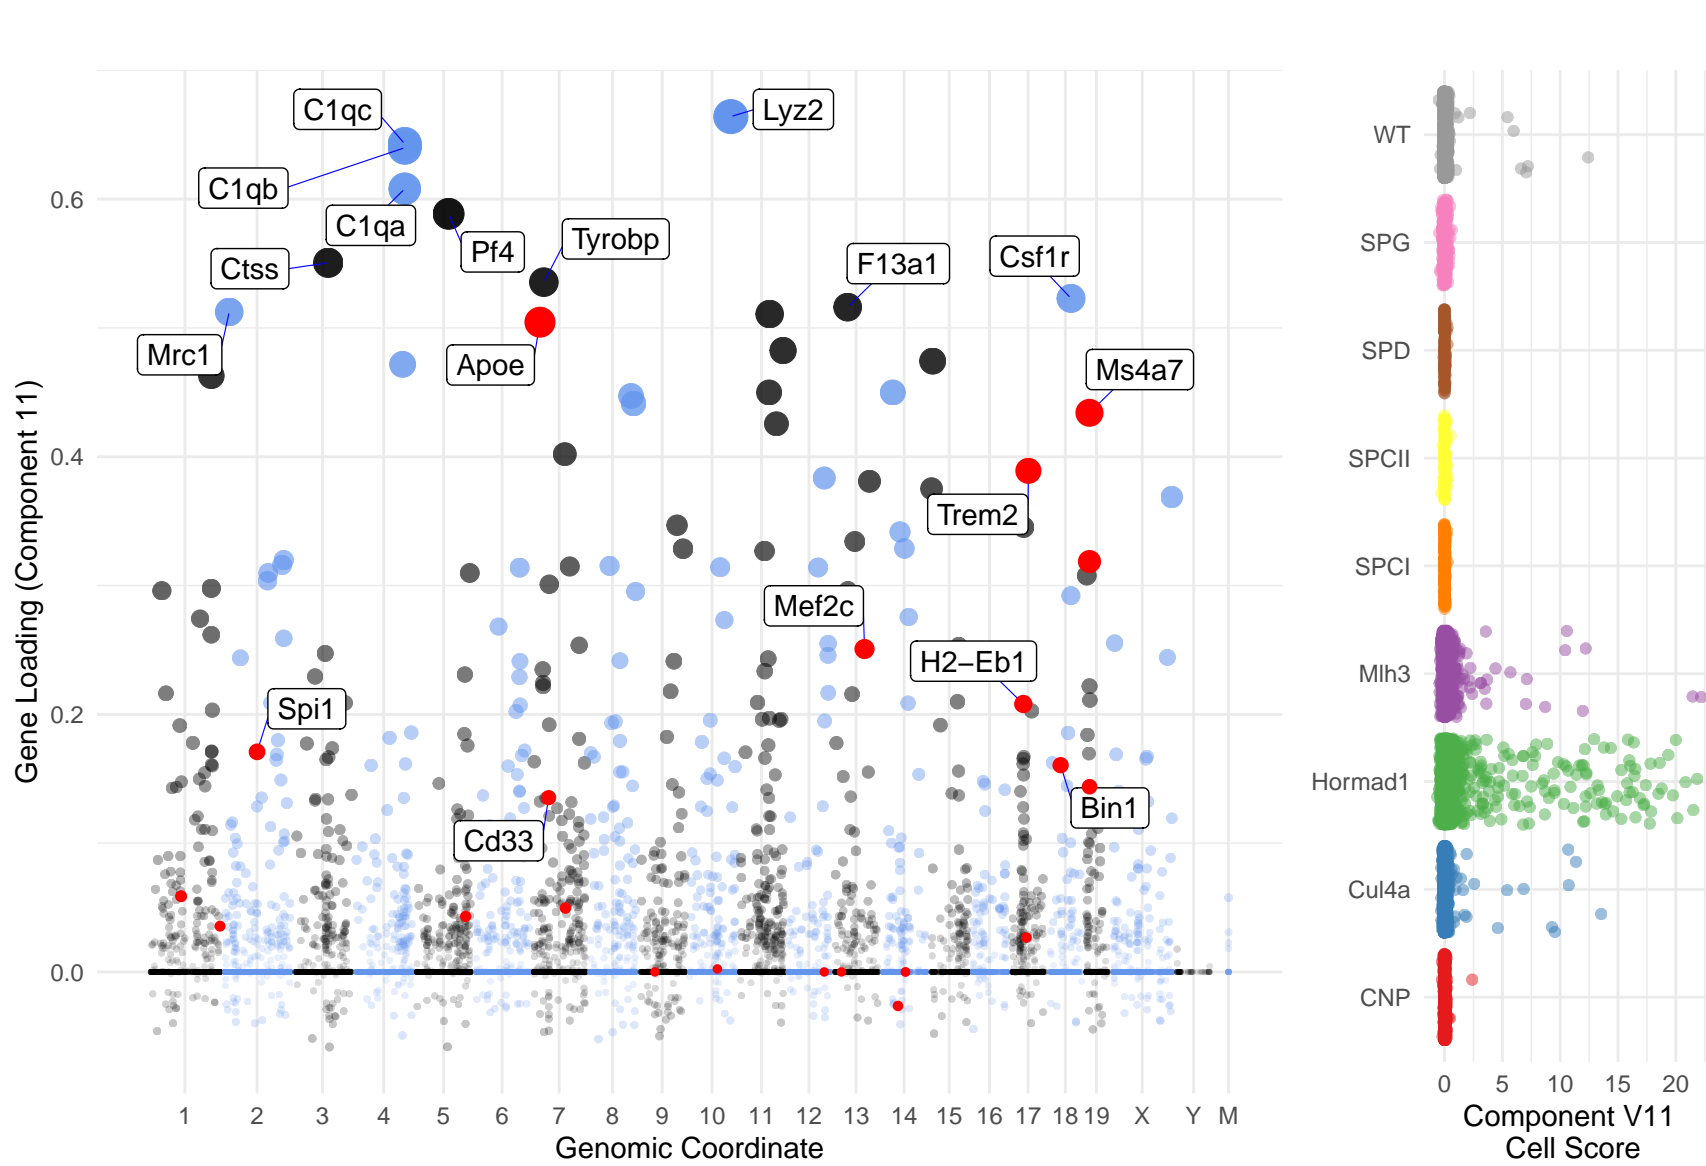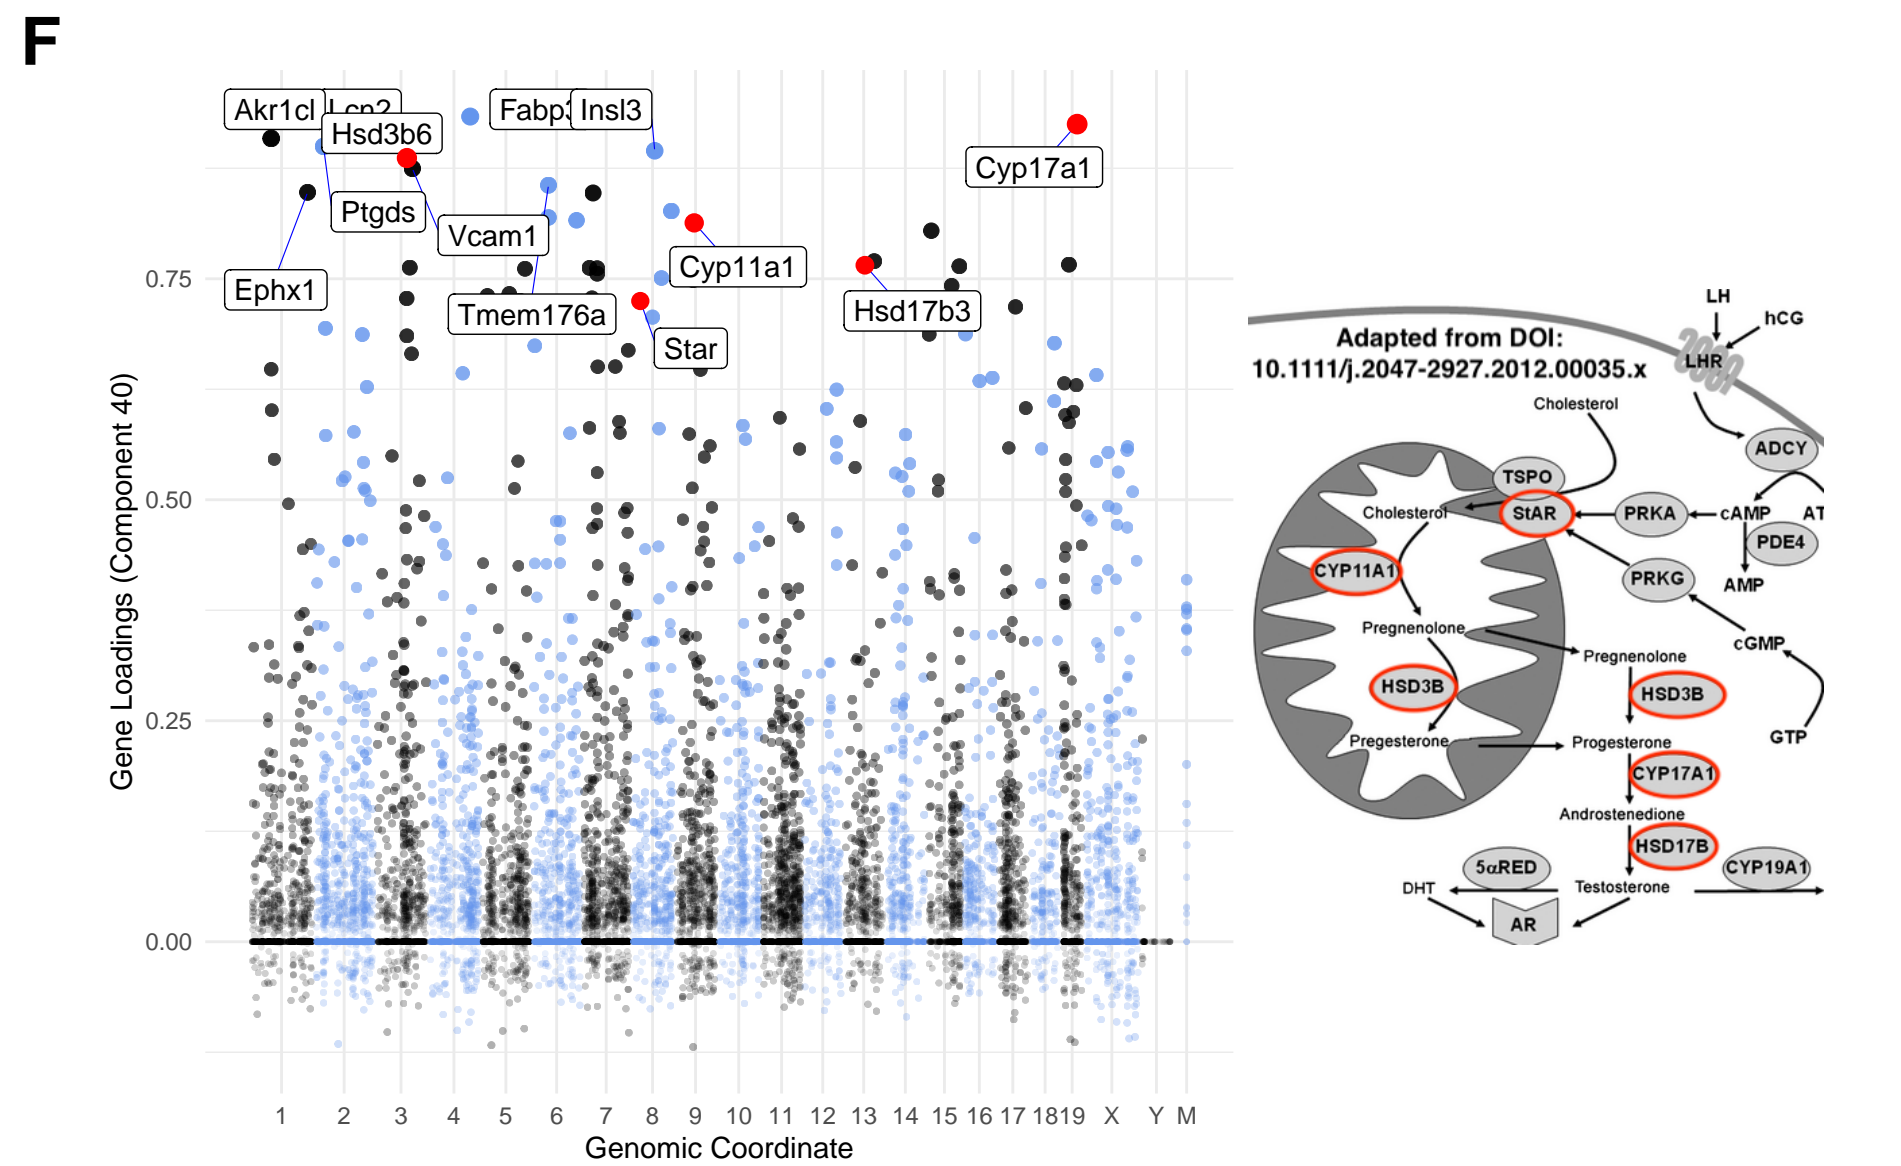

Supplement: supp [file elife-43966-supp-v1.zip › elife_poa_e43966_Figure_4_figure_supplement_3.pdf]

# Components from WT

Components from Mixed

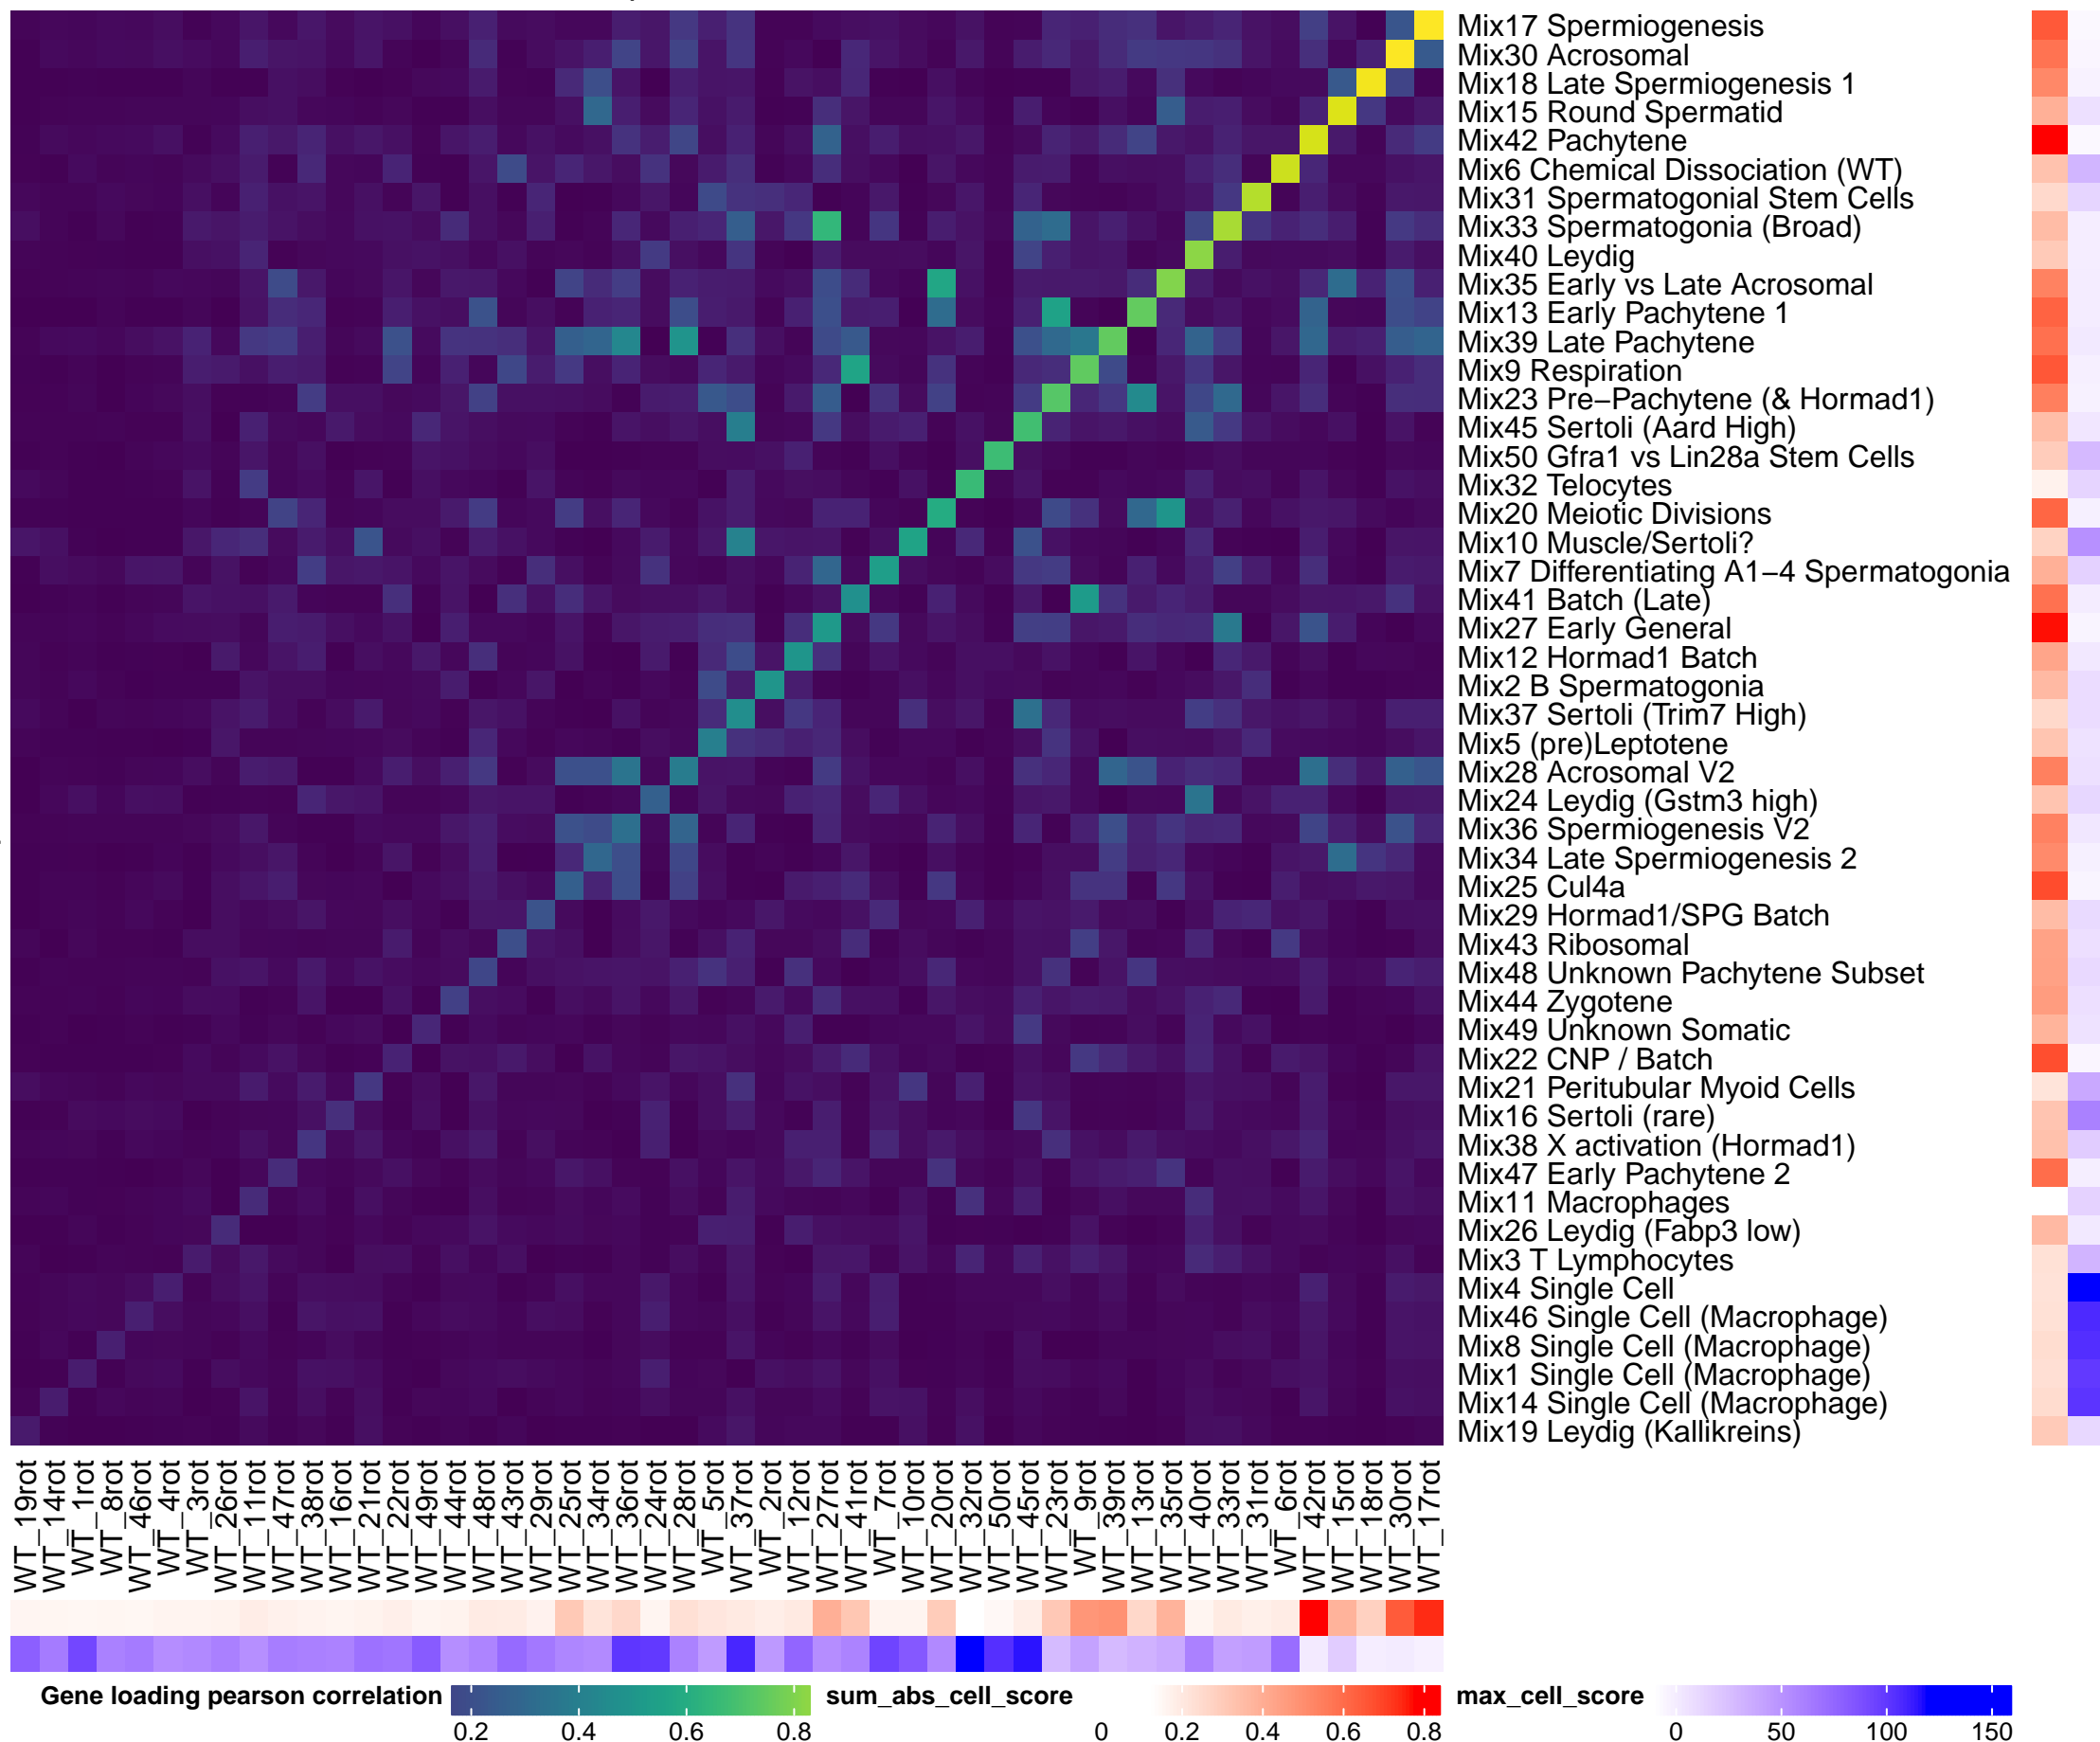

Supplement: supp [file elife-43966-supp-v1.zip › elife_poa_e43966_Figure_3_figure_supplement_2.pdf]

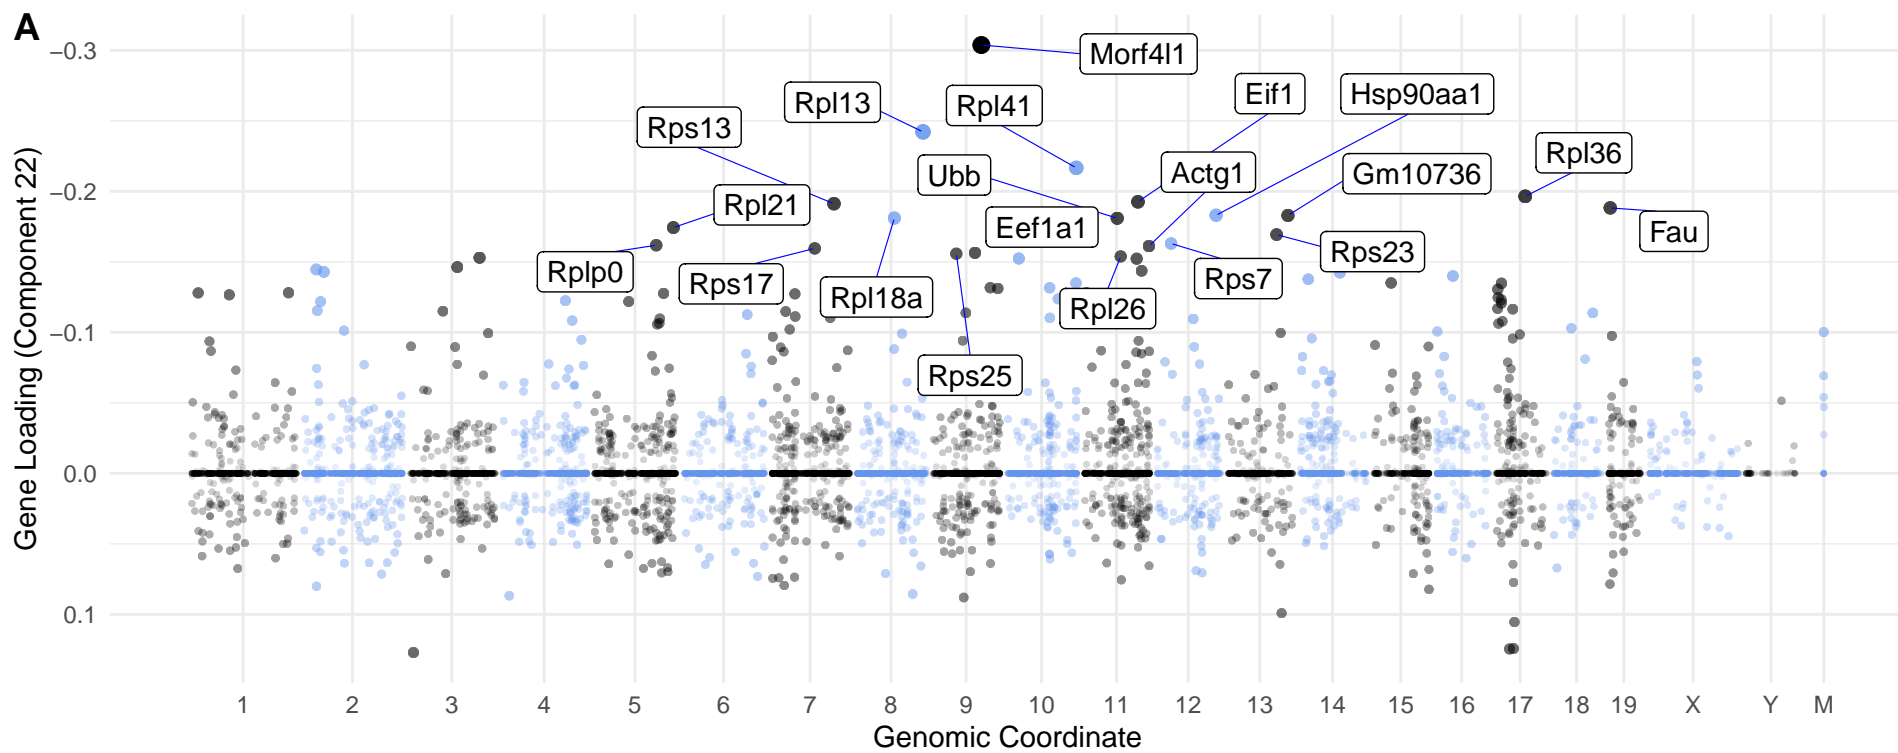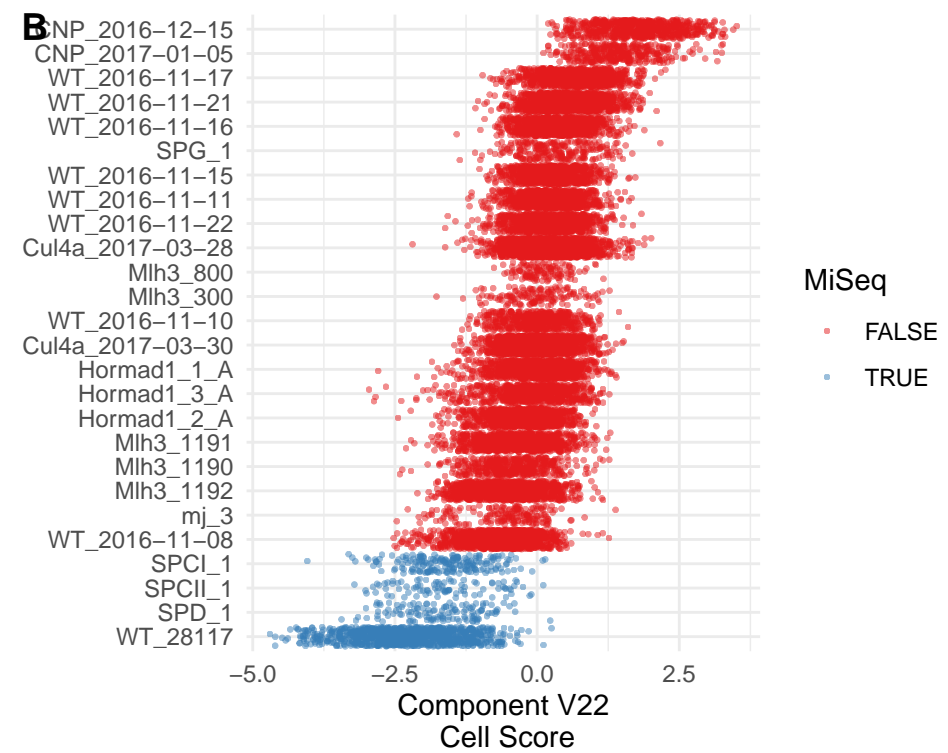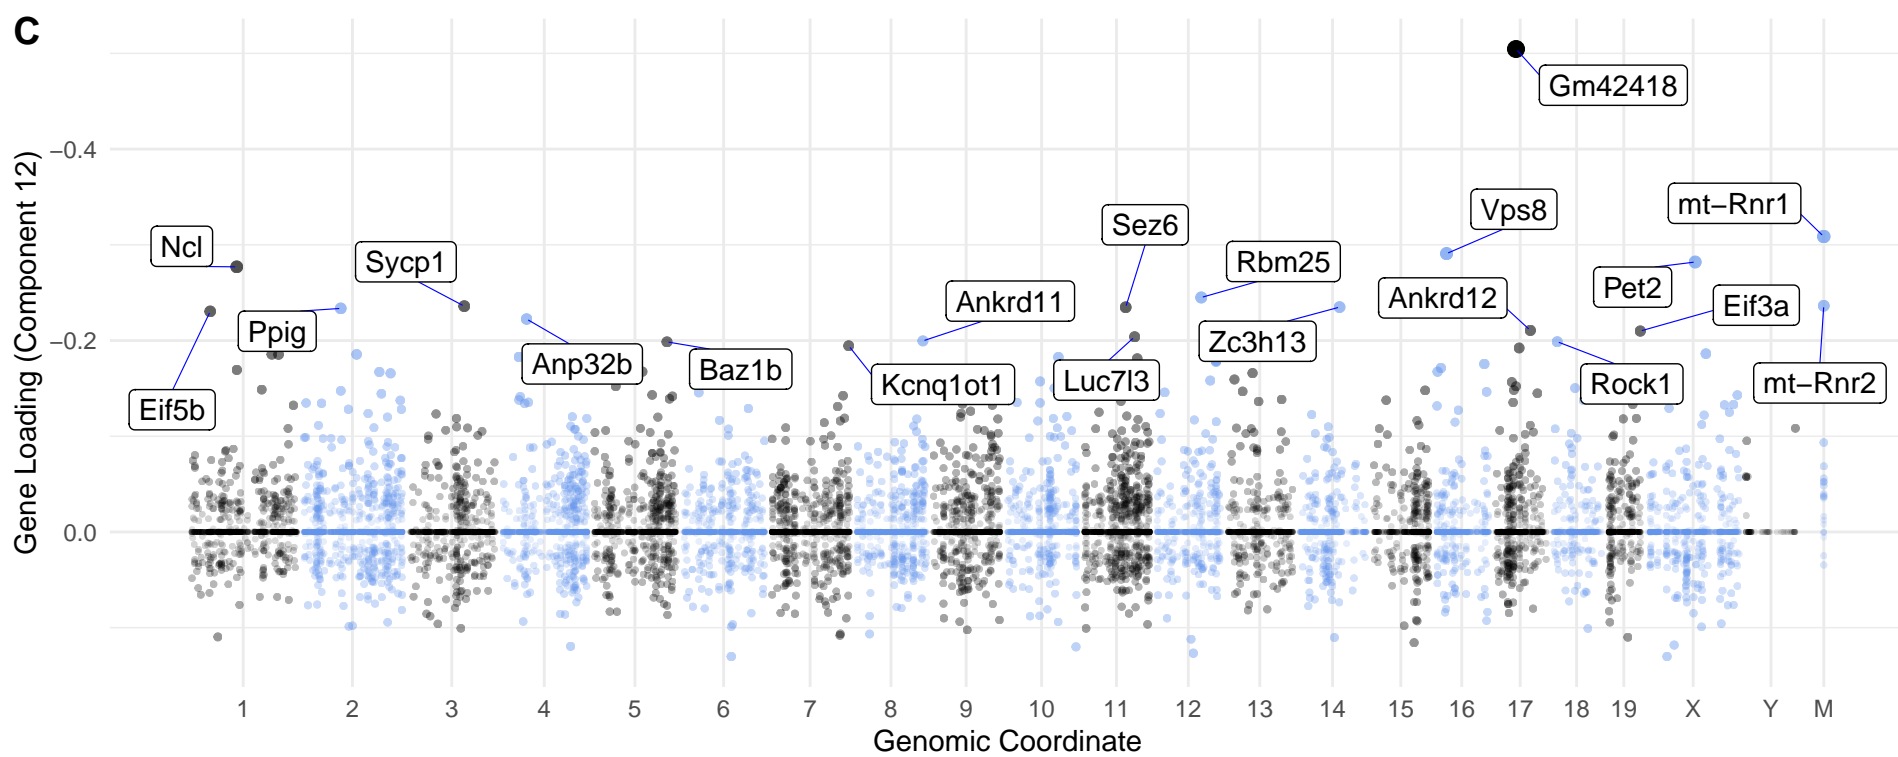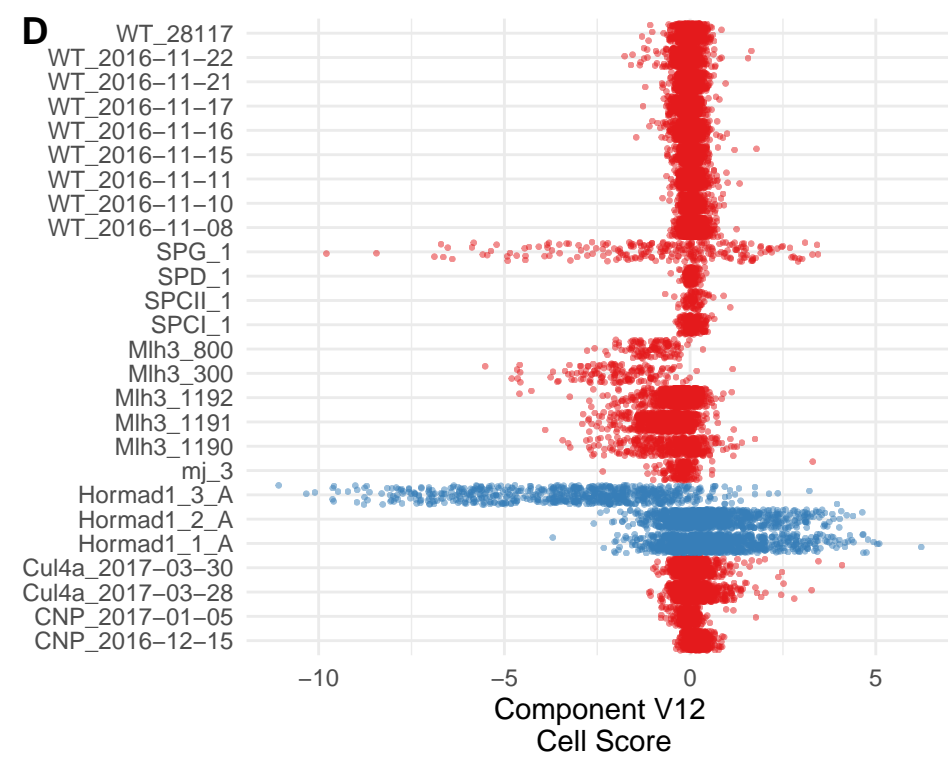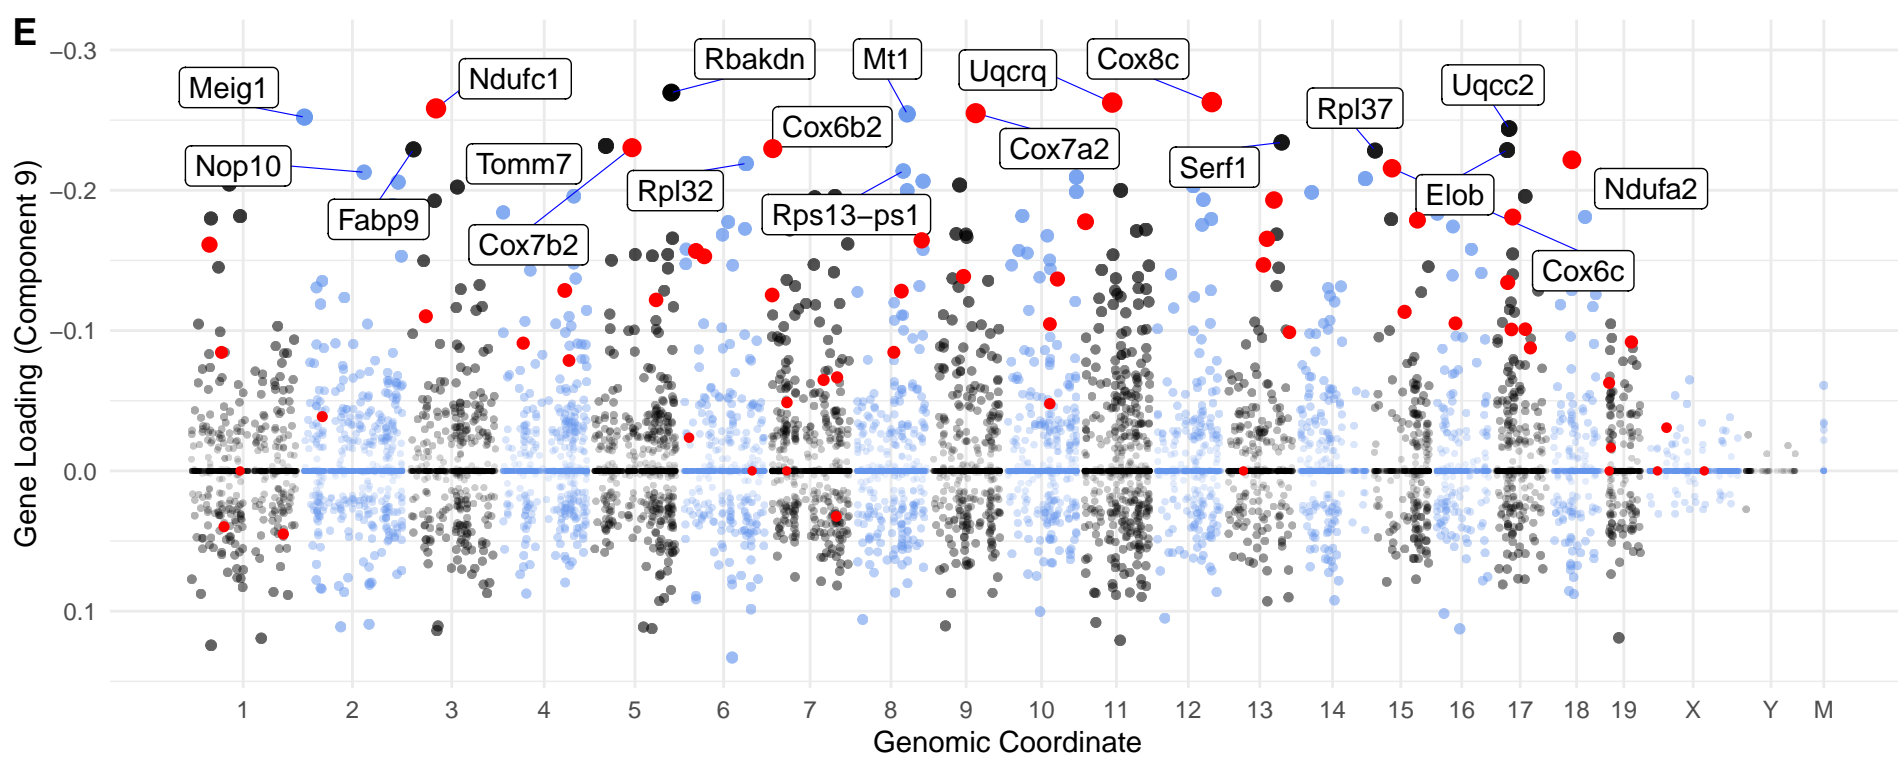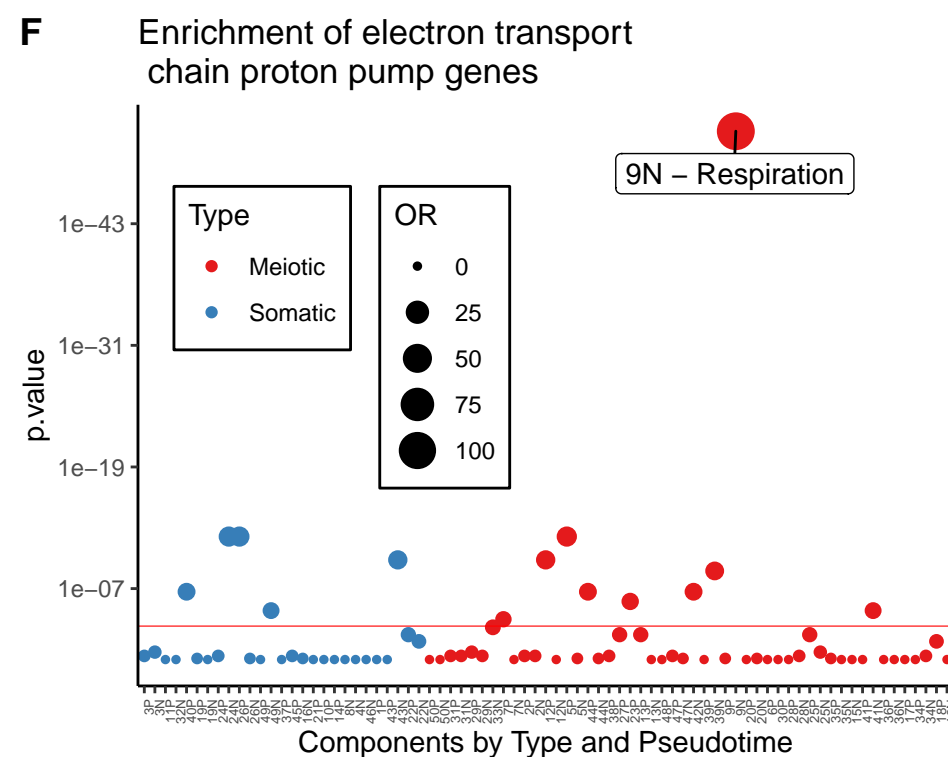

Supplement: supp [file elife-43966-supp-v1.zip › elife_poa_e43966_Figure_4_figure_supplement_4.pdf]

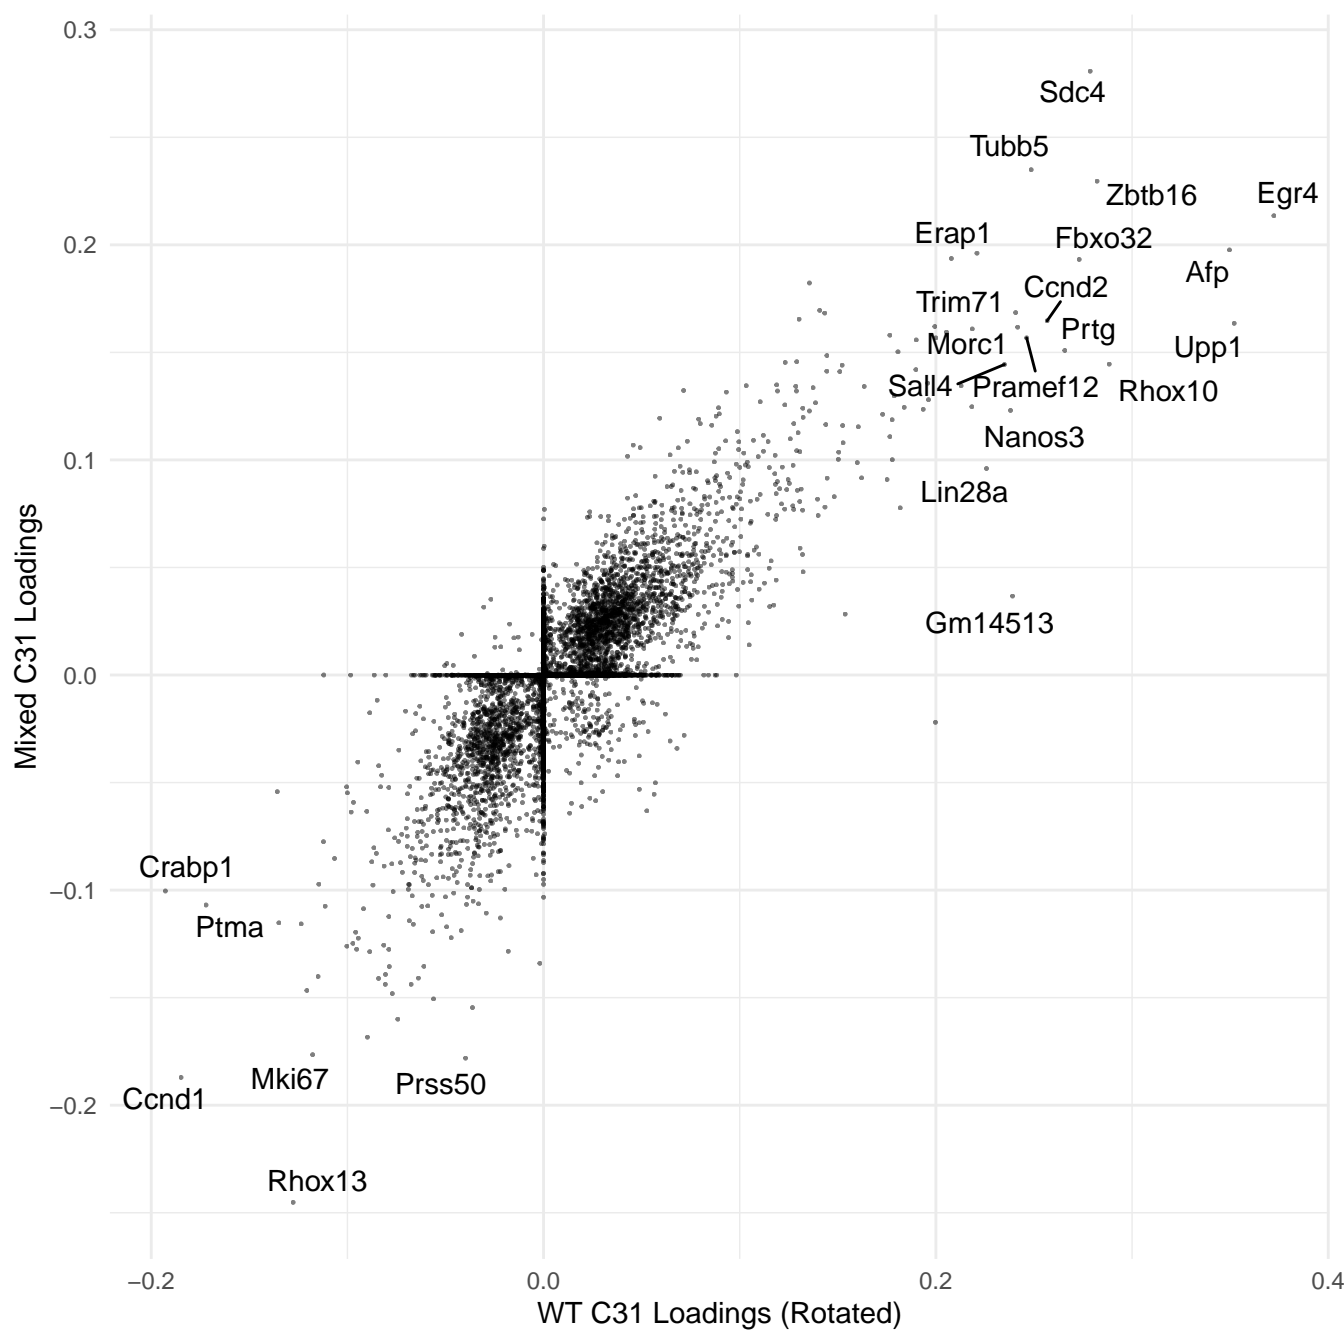

Supplement: supp [file elife-43966-supp-v1.zip › elife_poa_e43966_Figure_3_figure_supplement_4.pdf]

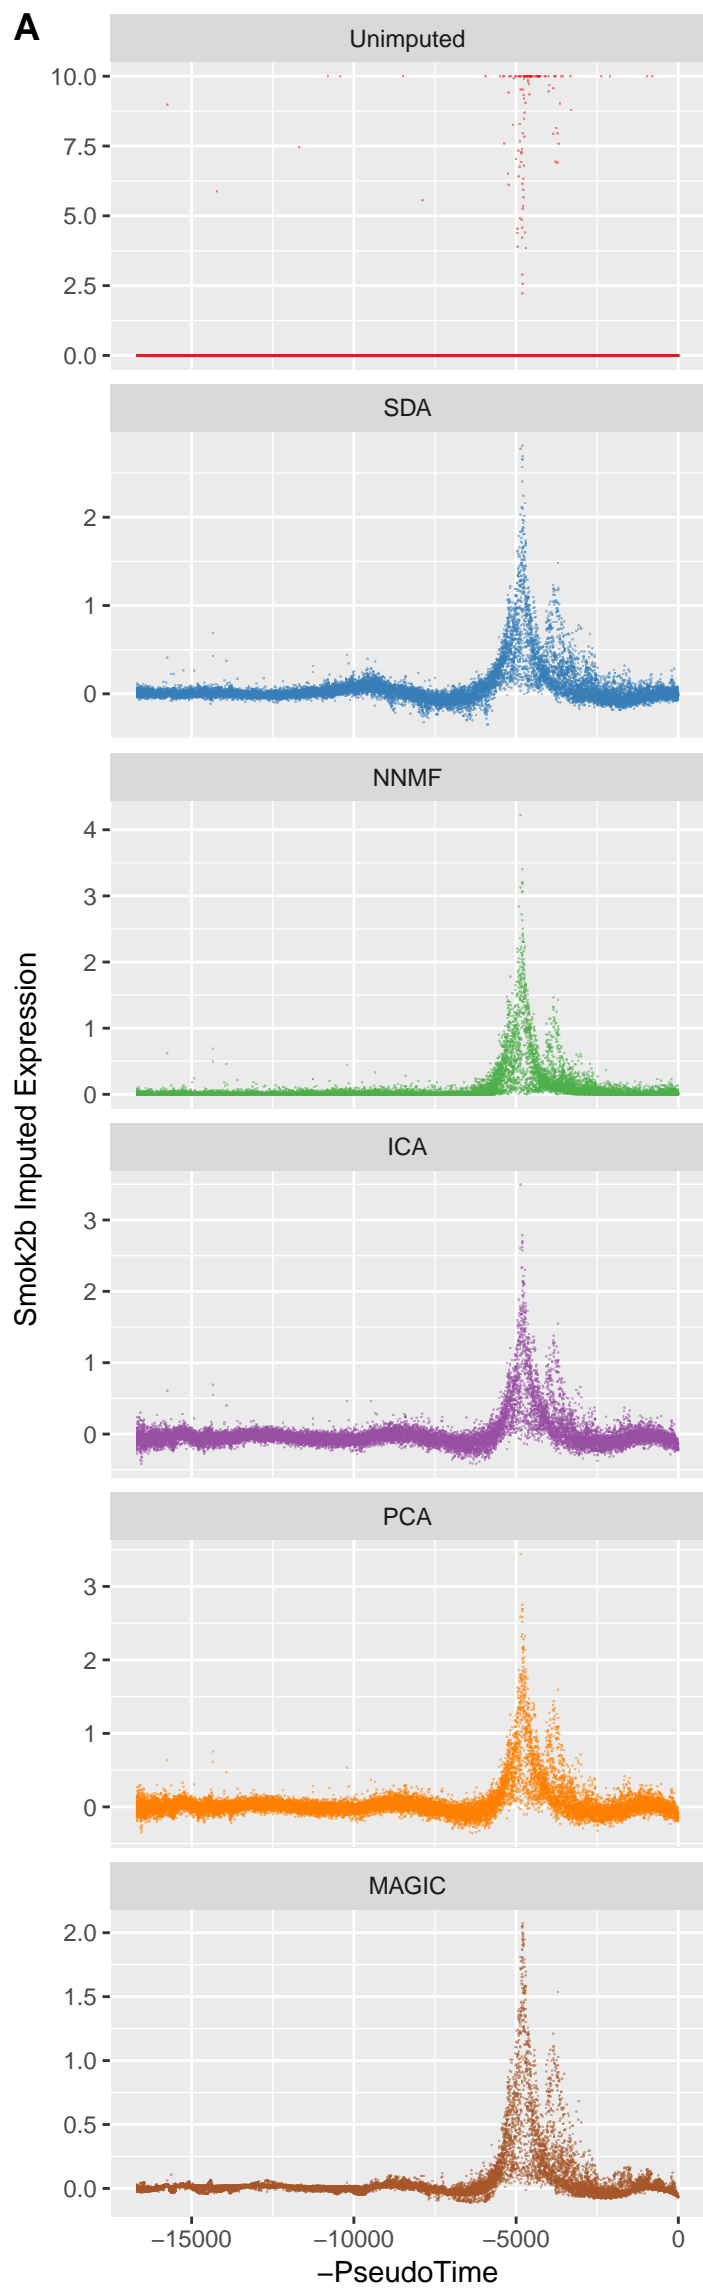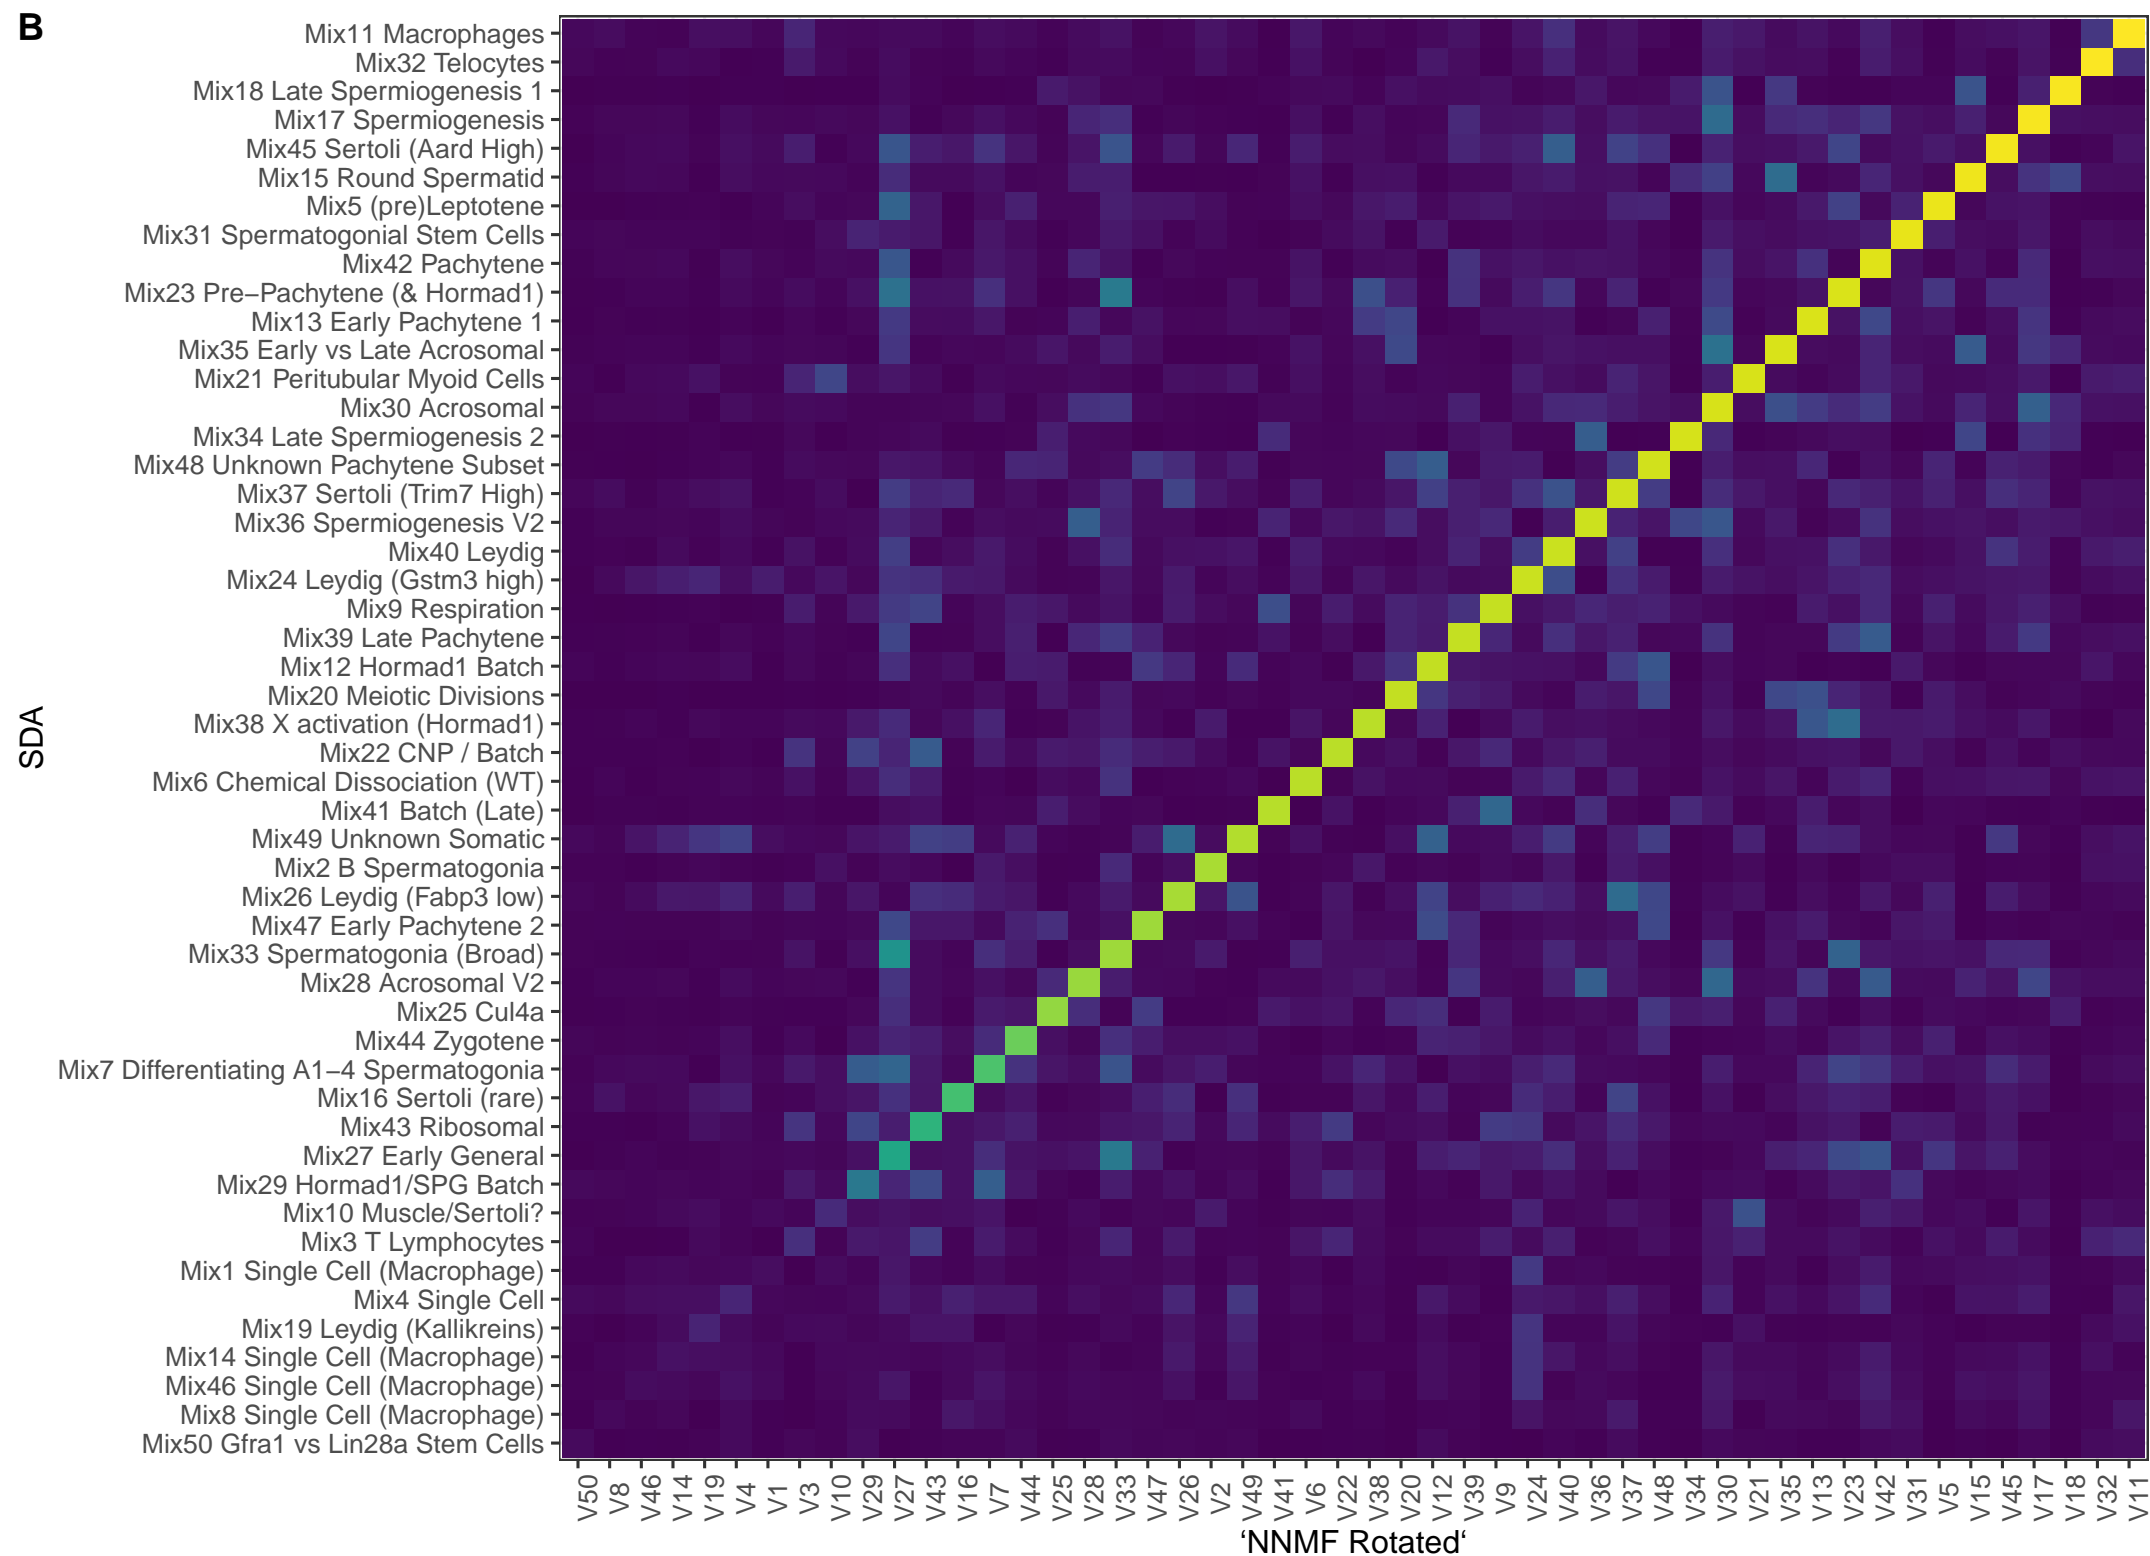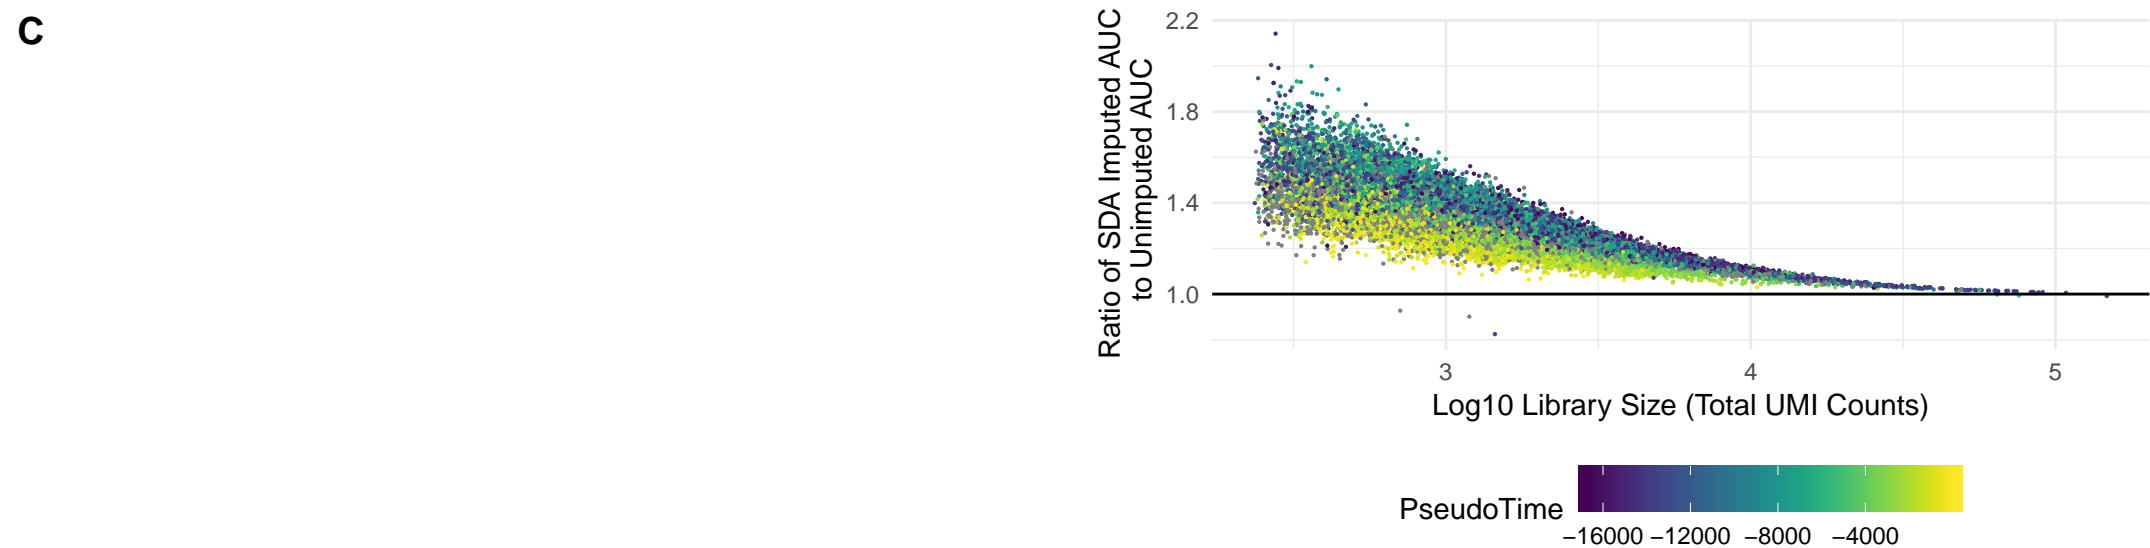

Supplement: supp [file elife-43966-supp-v1.zip › elife_poa_e43966_Figure_5_figure_supplement_1.pdf]

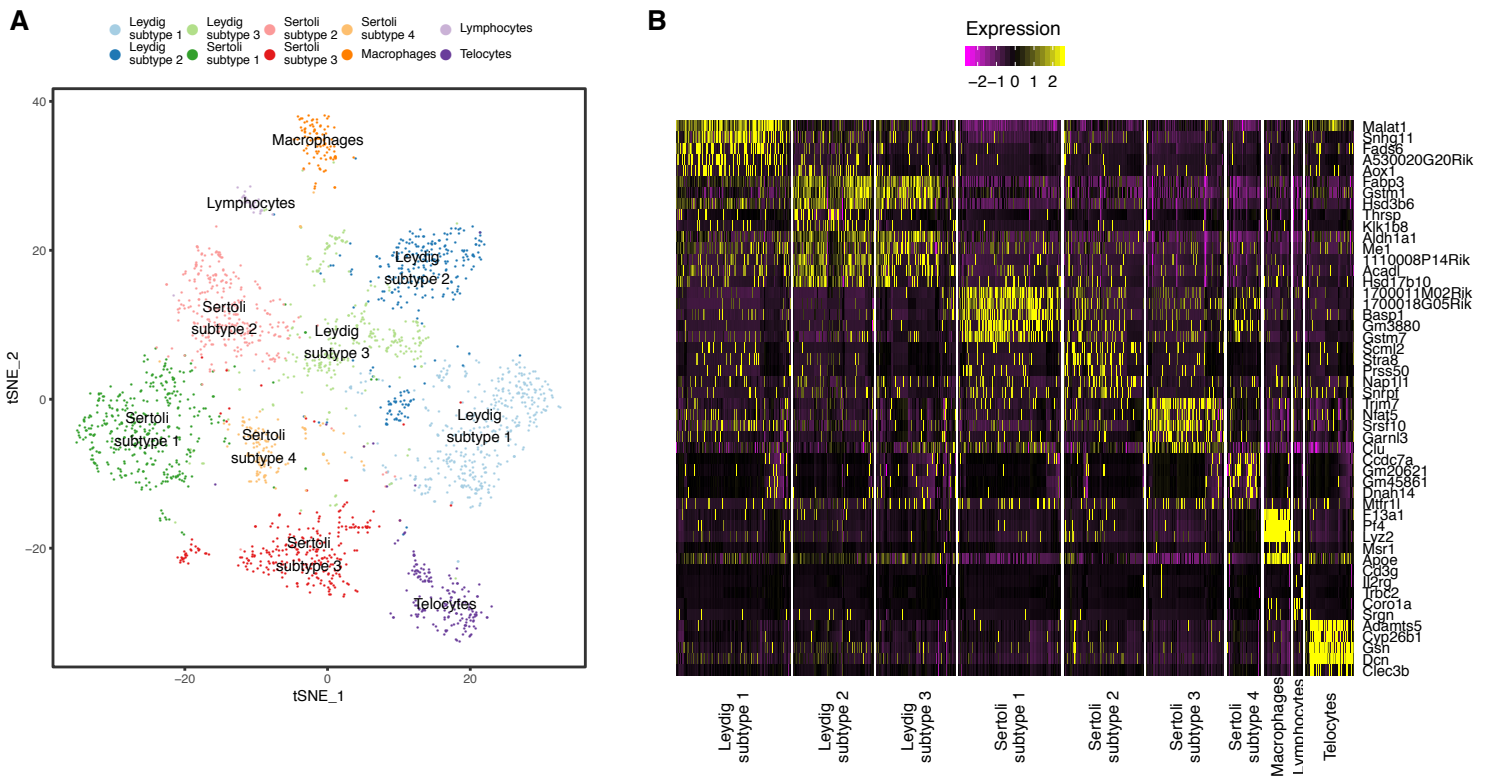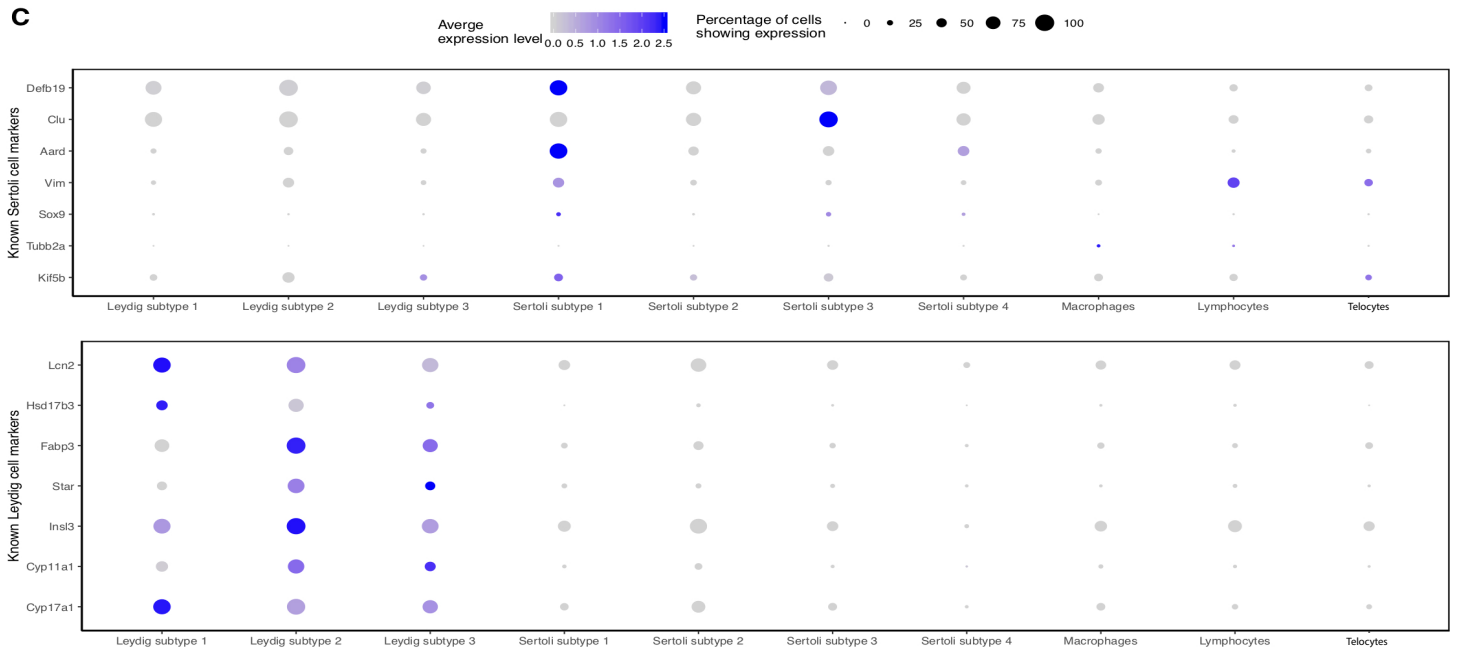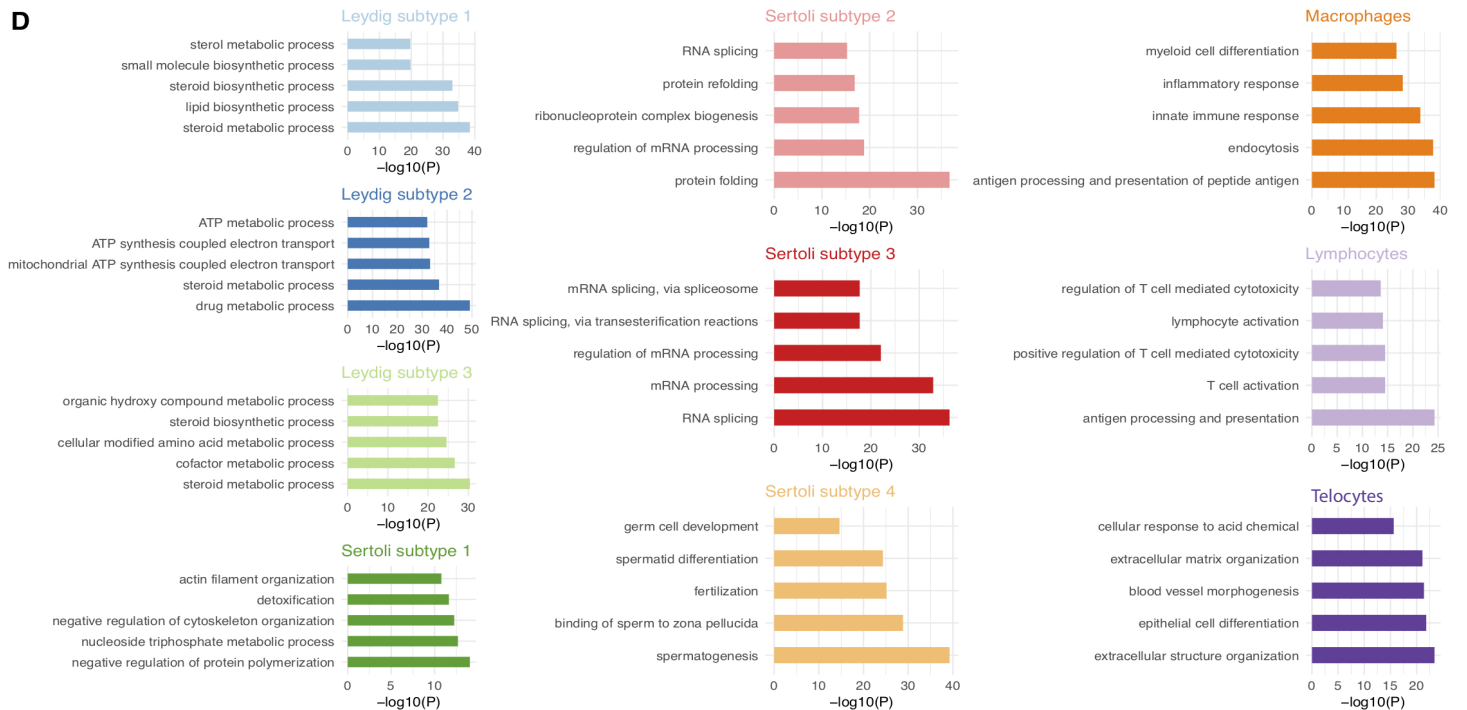

Supplement: supp [file elife-43966-supp-v1.zip › elife_poa_e43966_Figure_1_figure_supplement_5.pdf]

A

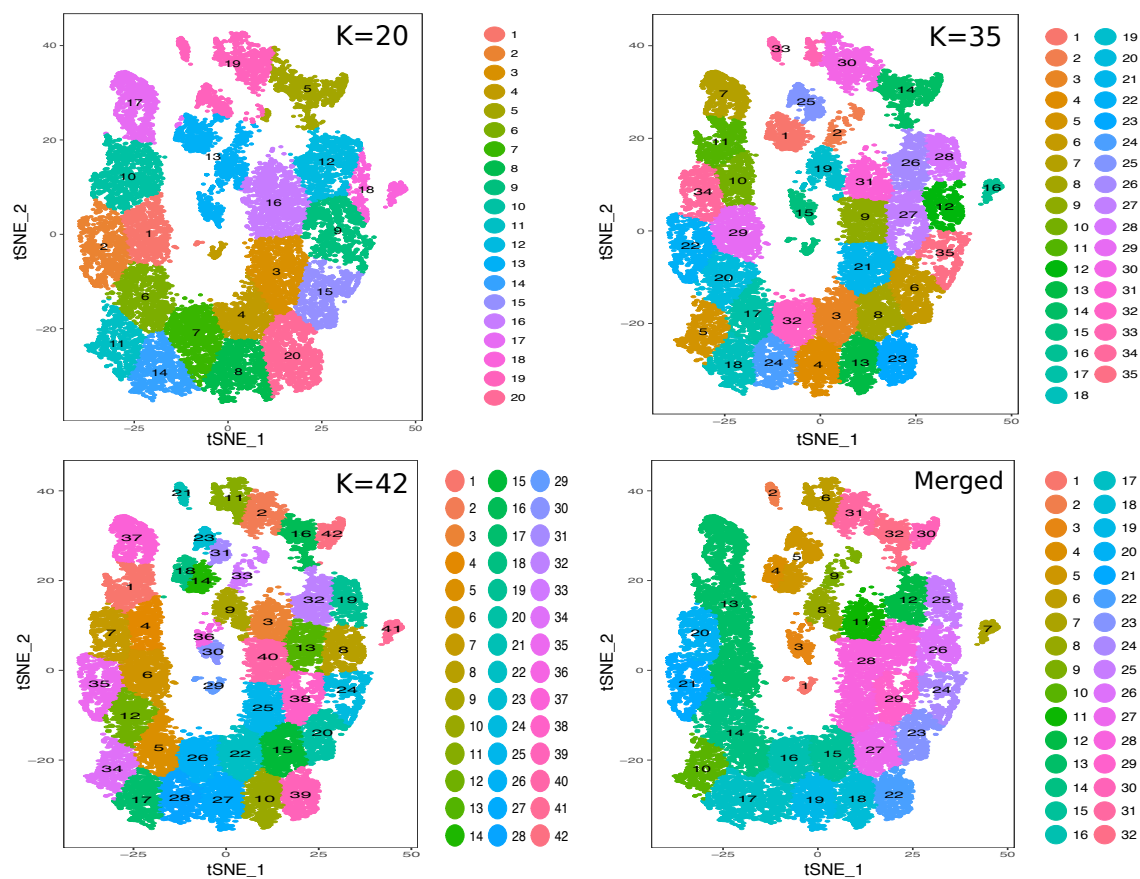

B

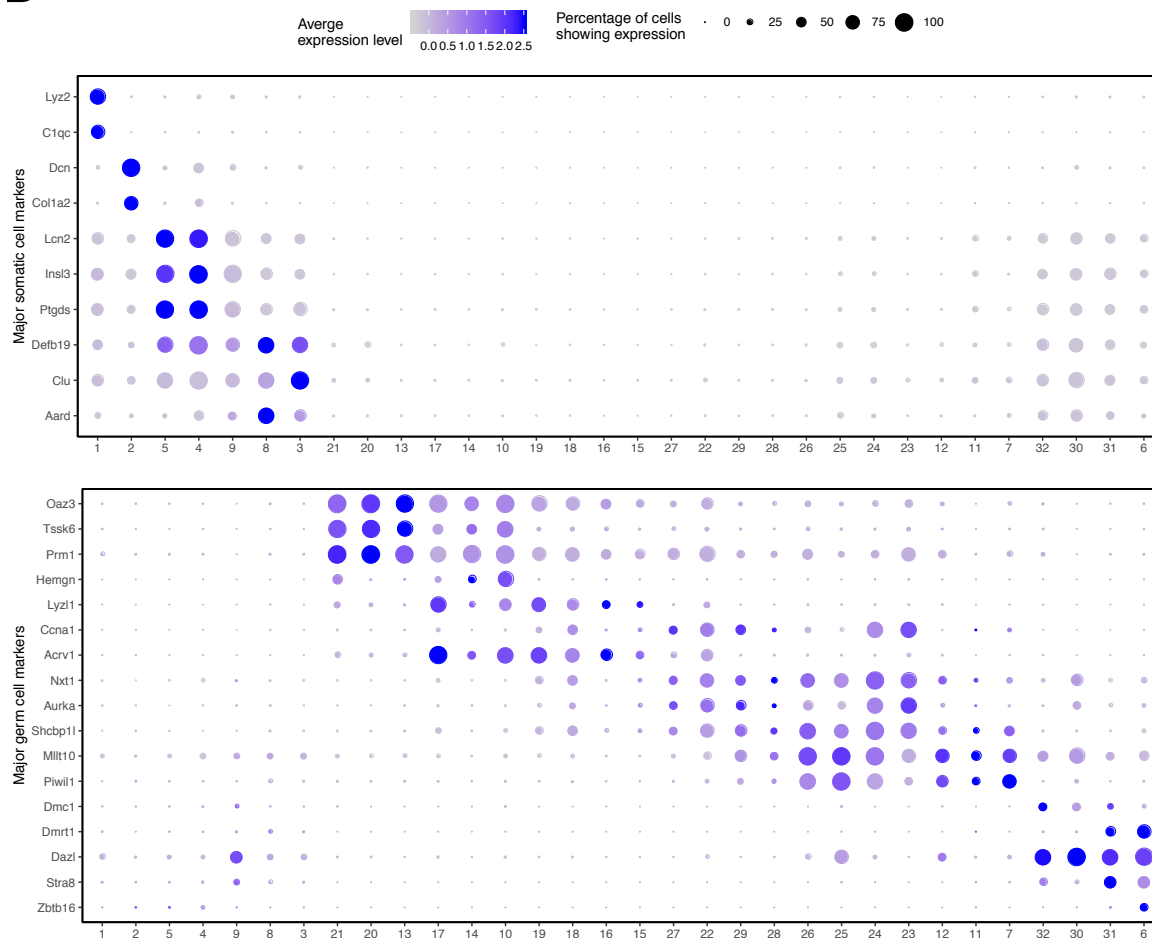

Supplement: supp [file elife-43966-supp-v1.zip › elife_poa_e43966_Figure_1_figure_supplement_2.pdf]

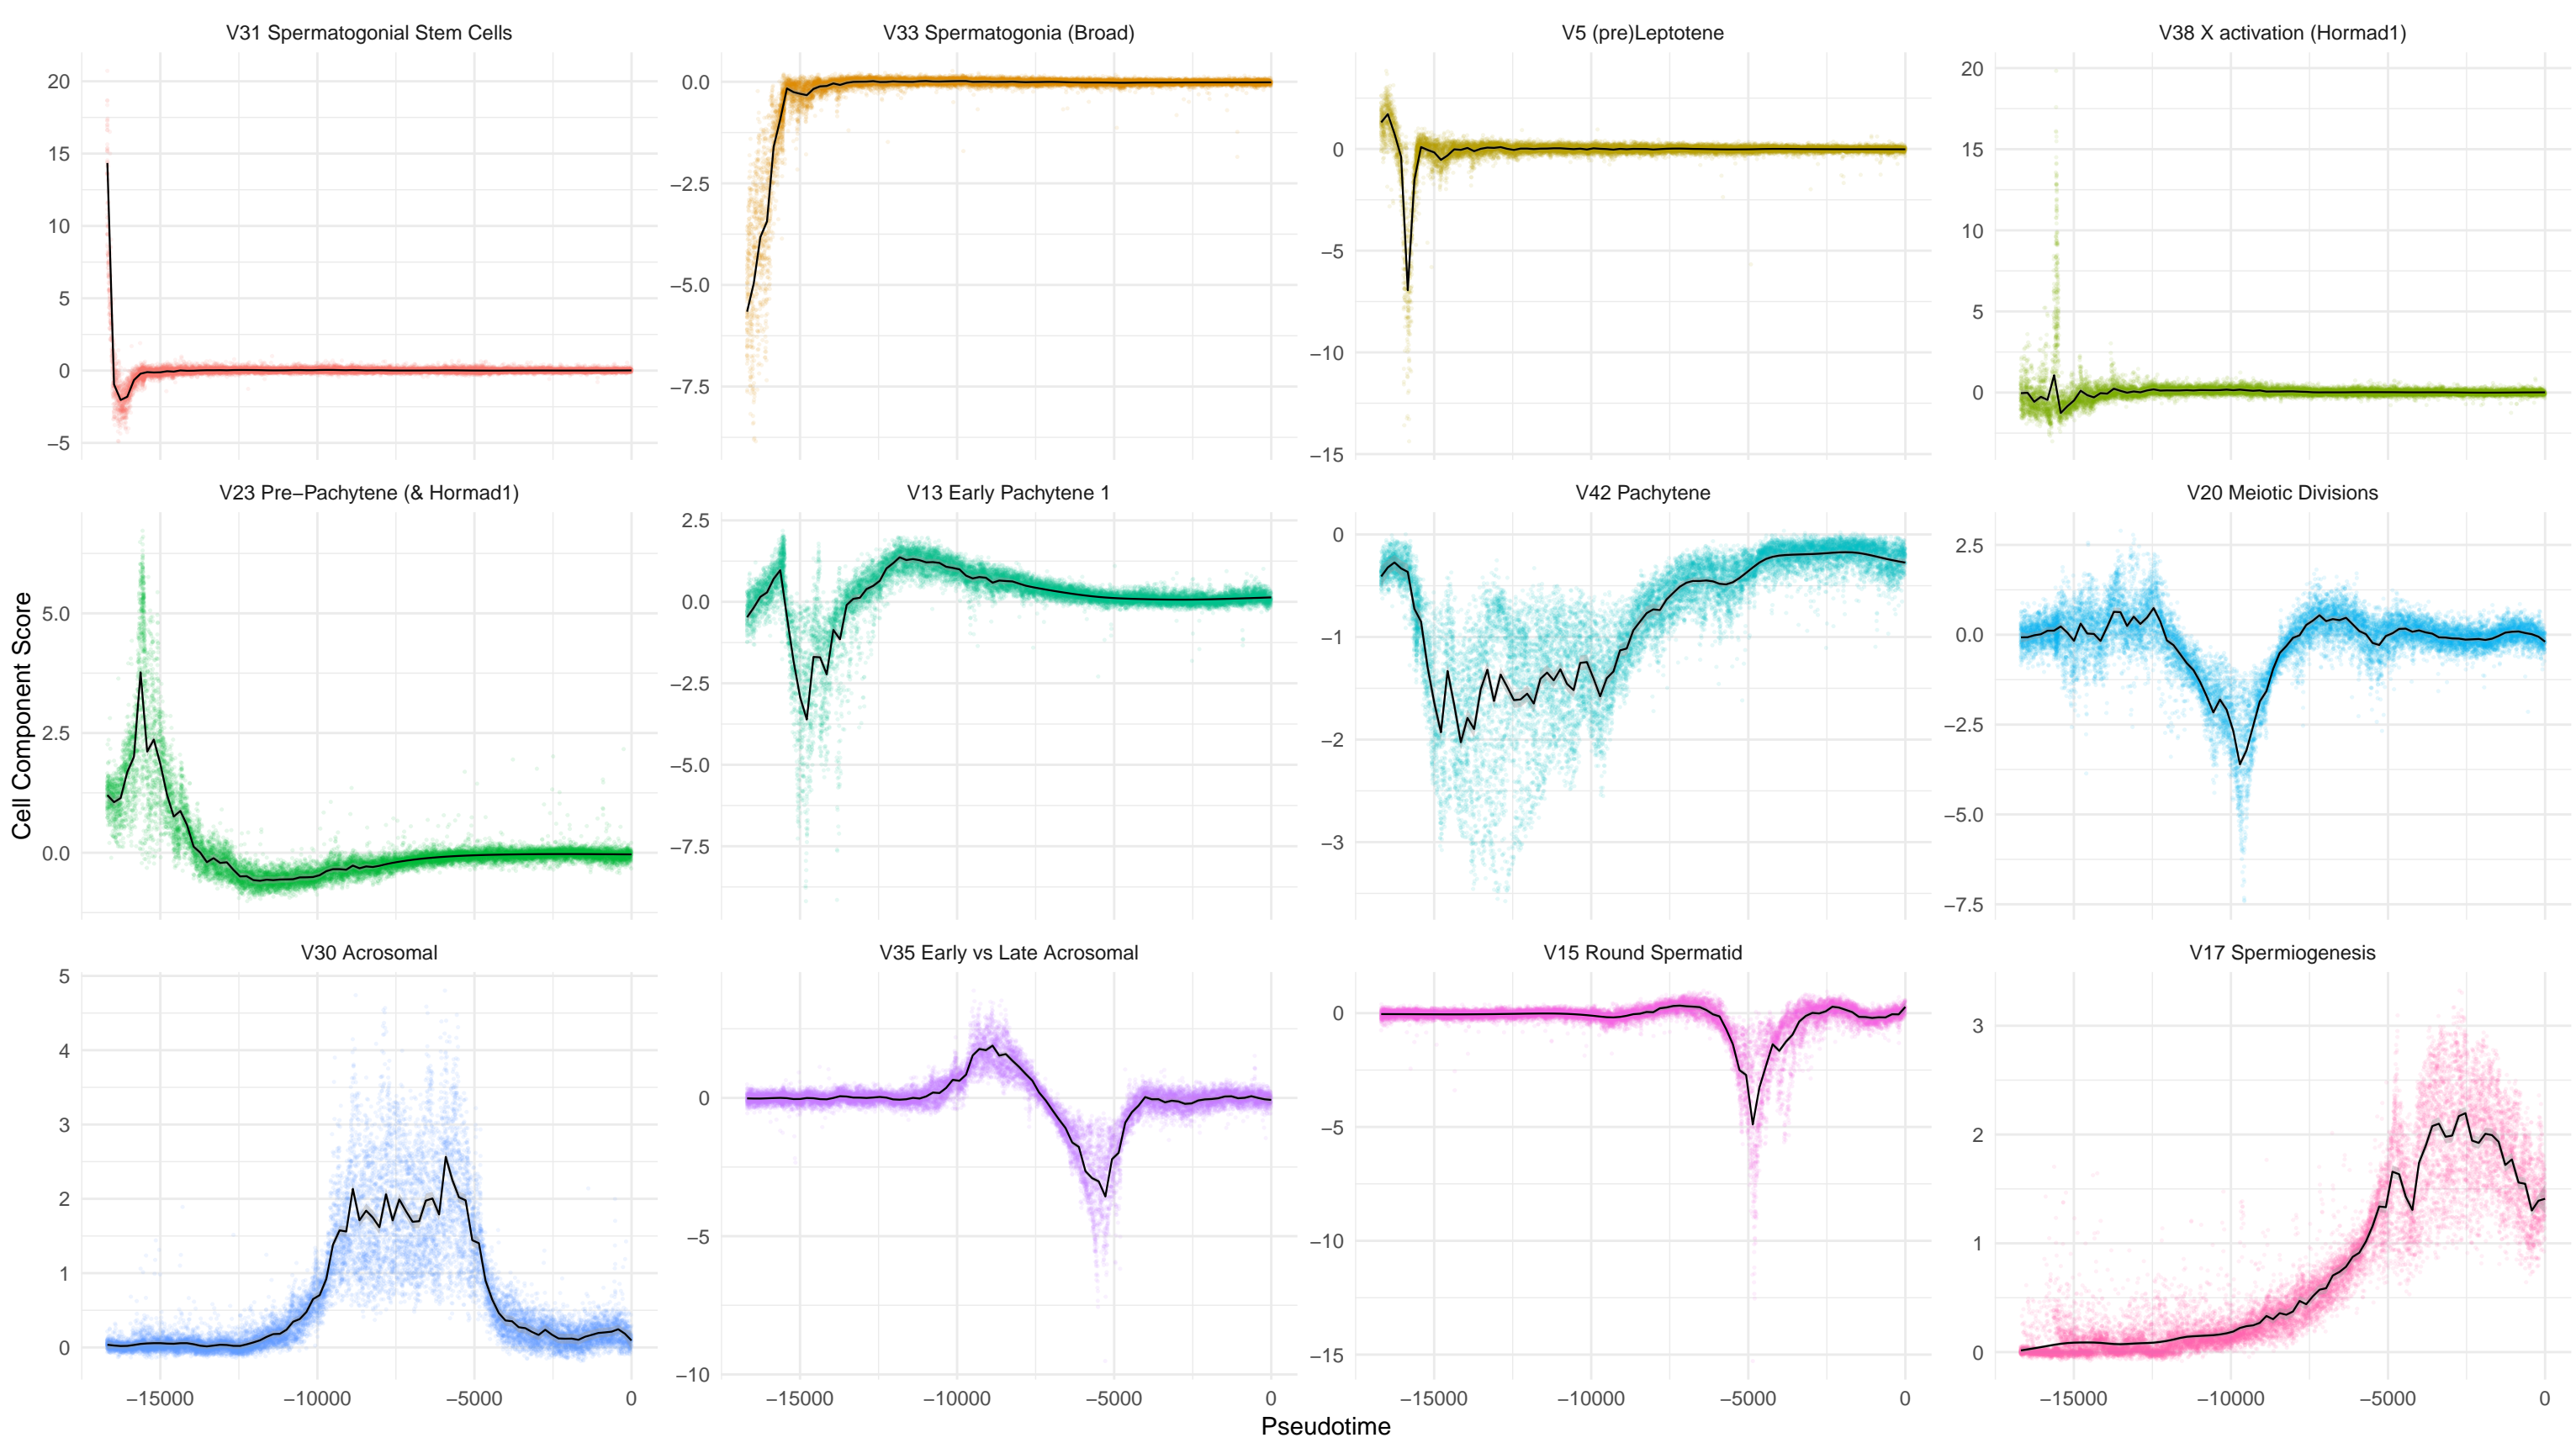

Supplement: supp [file elife-43966-supp-v1.zip › elife_poa_e43966_Figure_4_figure_supplement_2.pdf]

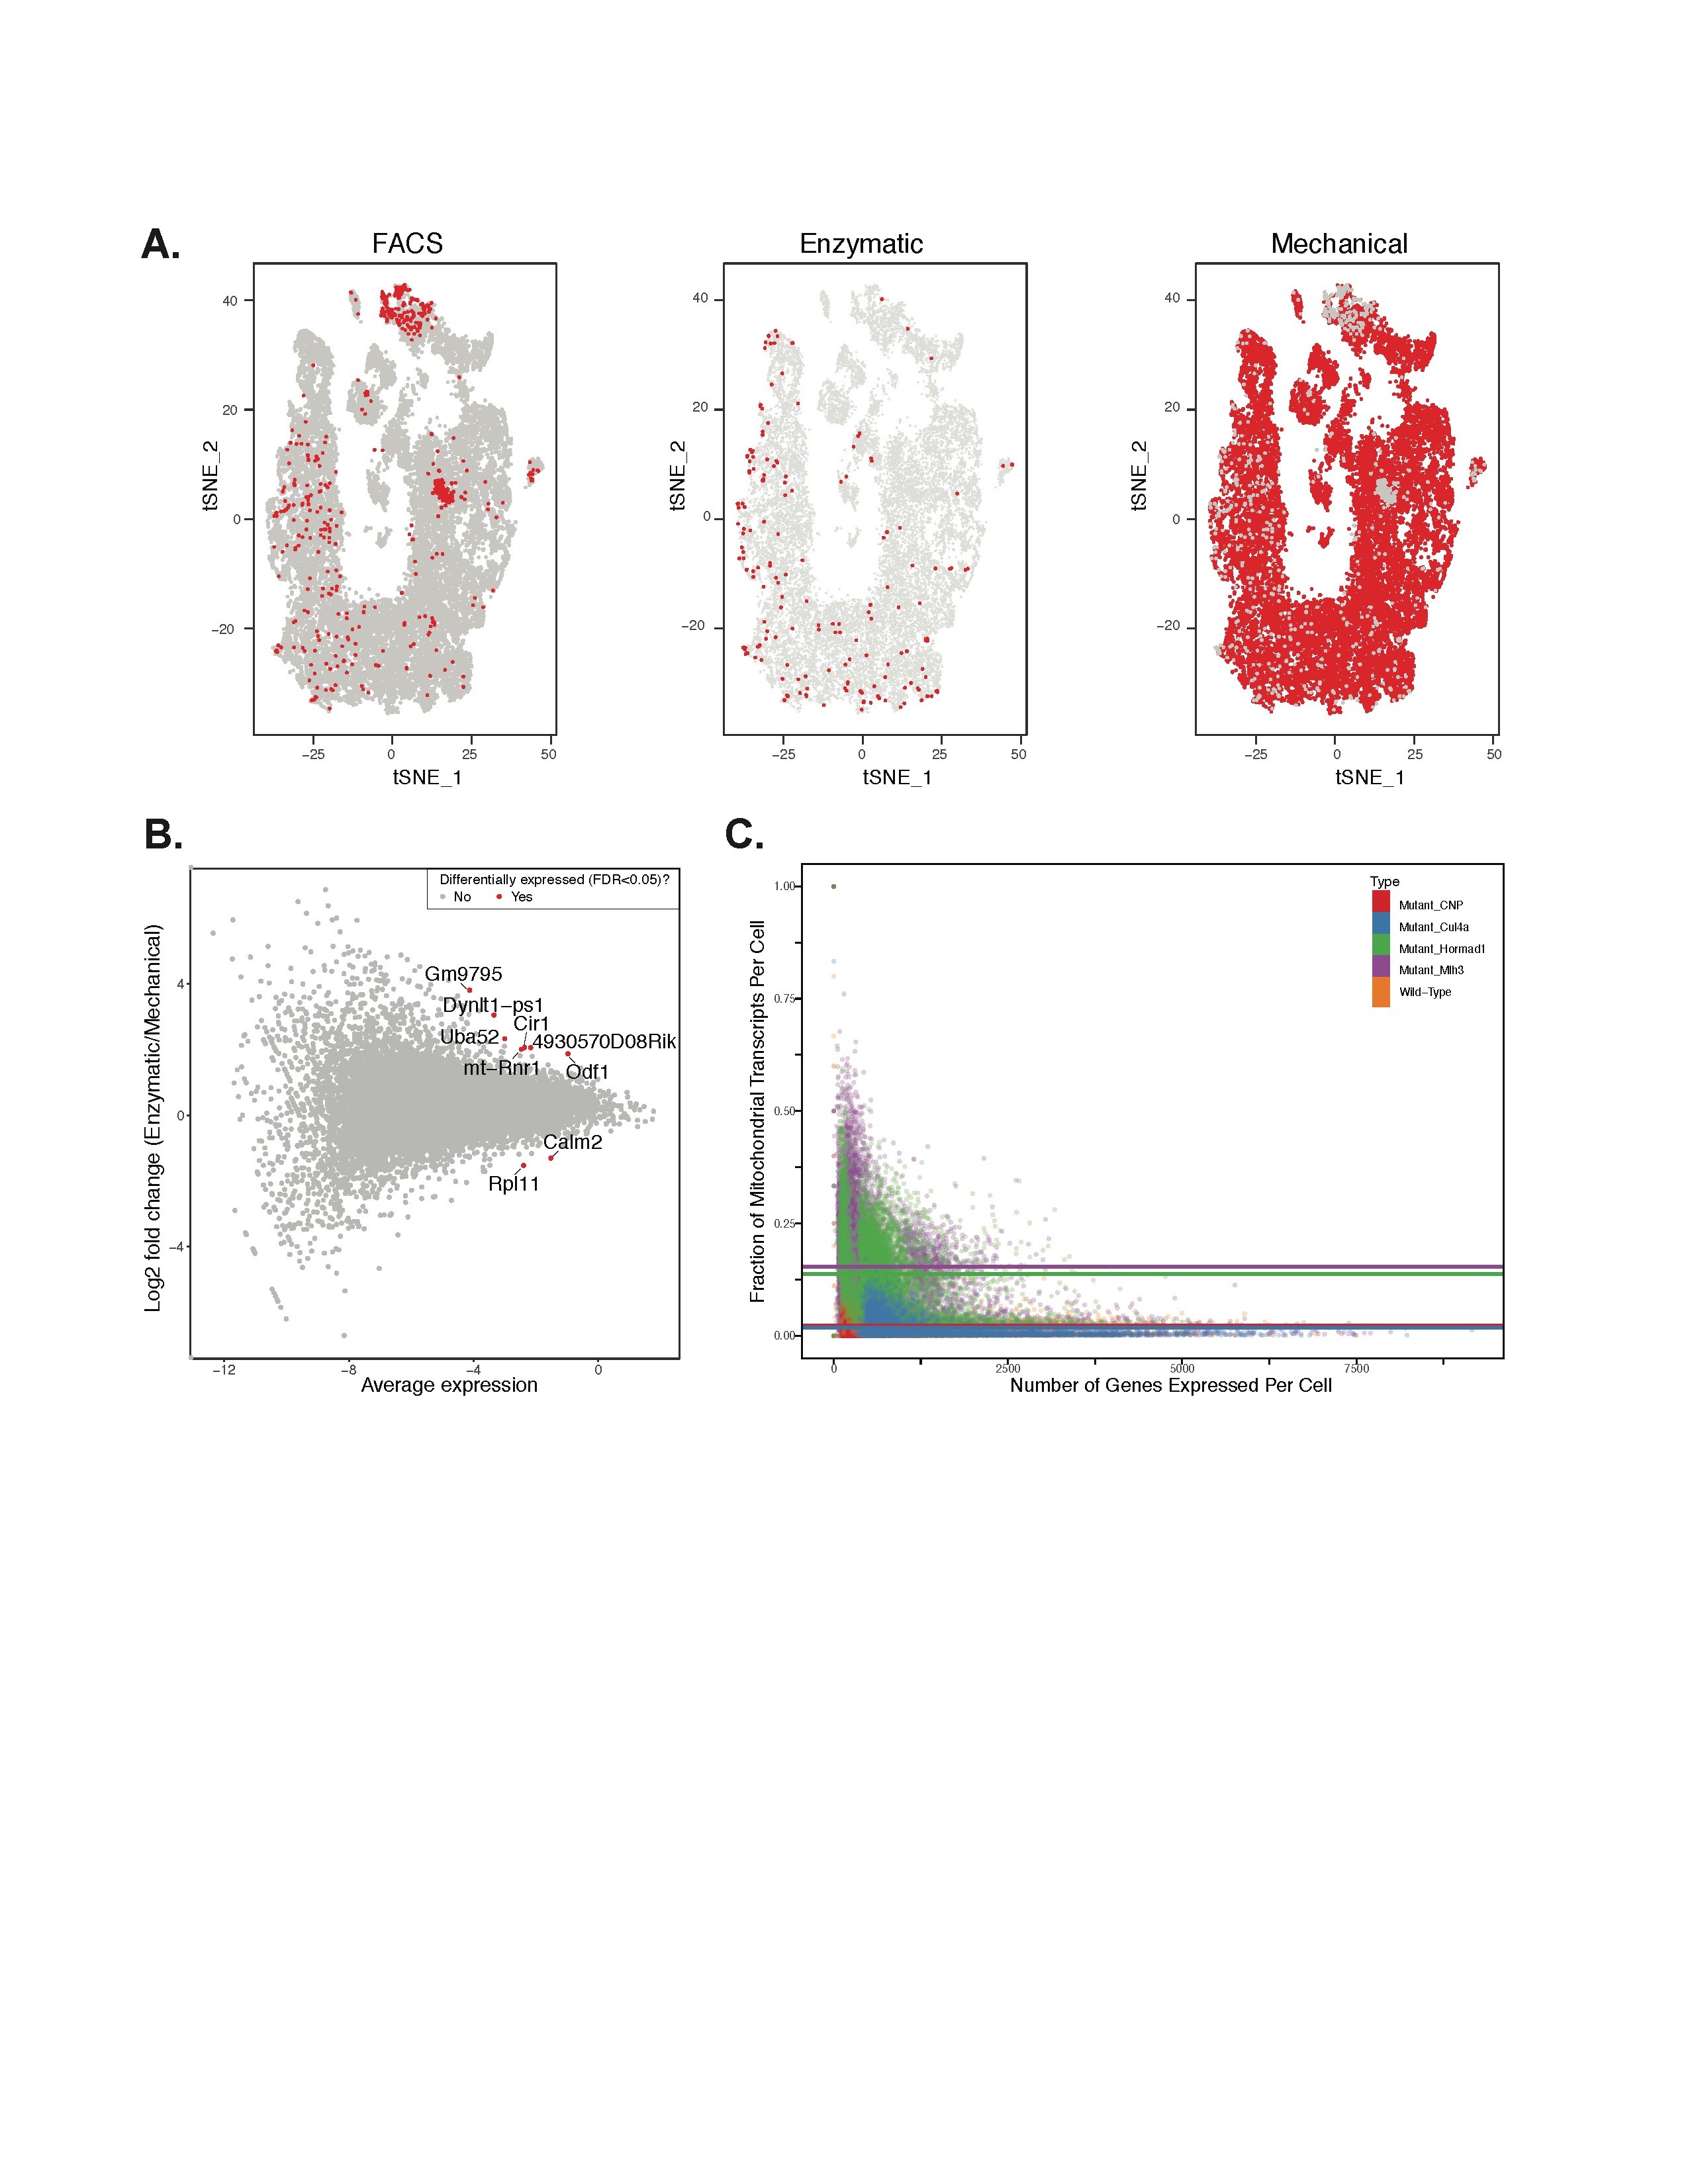

Supplement: supp [file elife-43966-supp-v1.zip › elife_poa_e43966_Figure_1_figure_supplement_1.jpg]

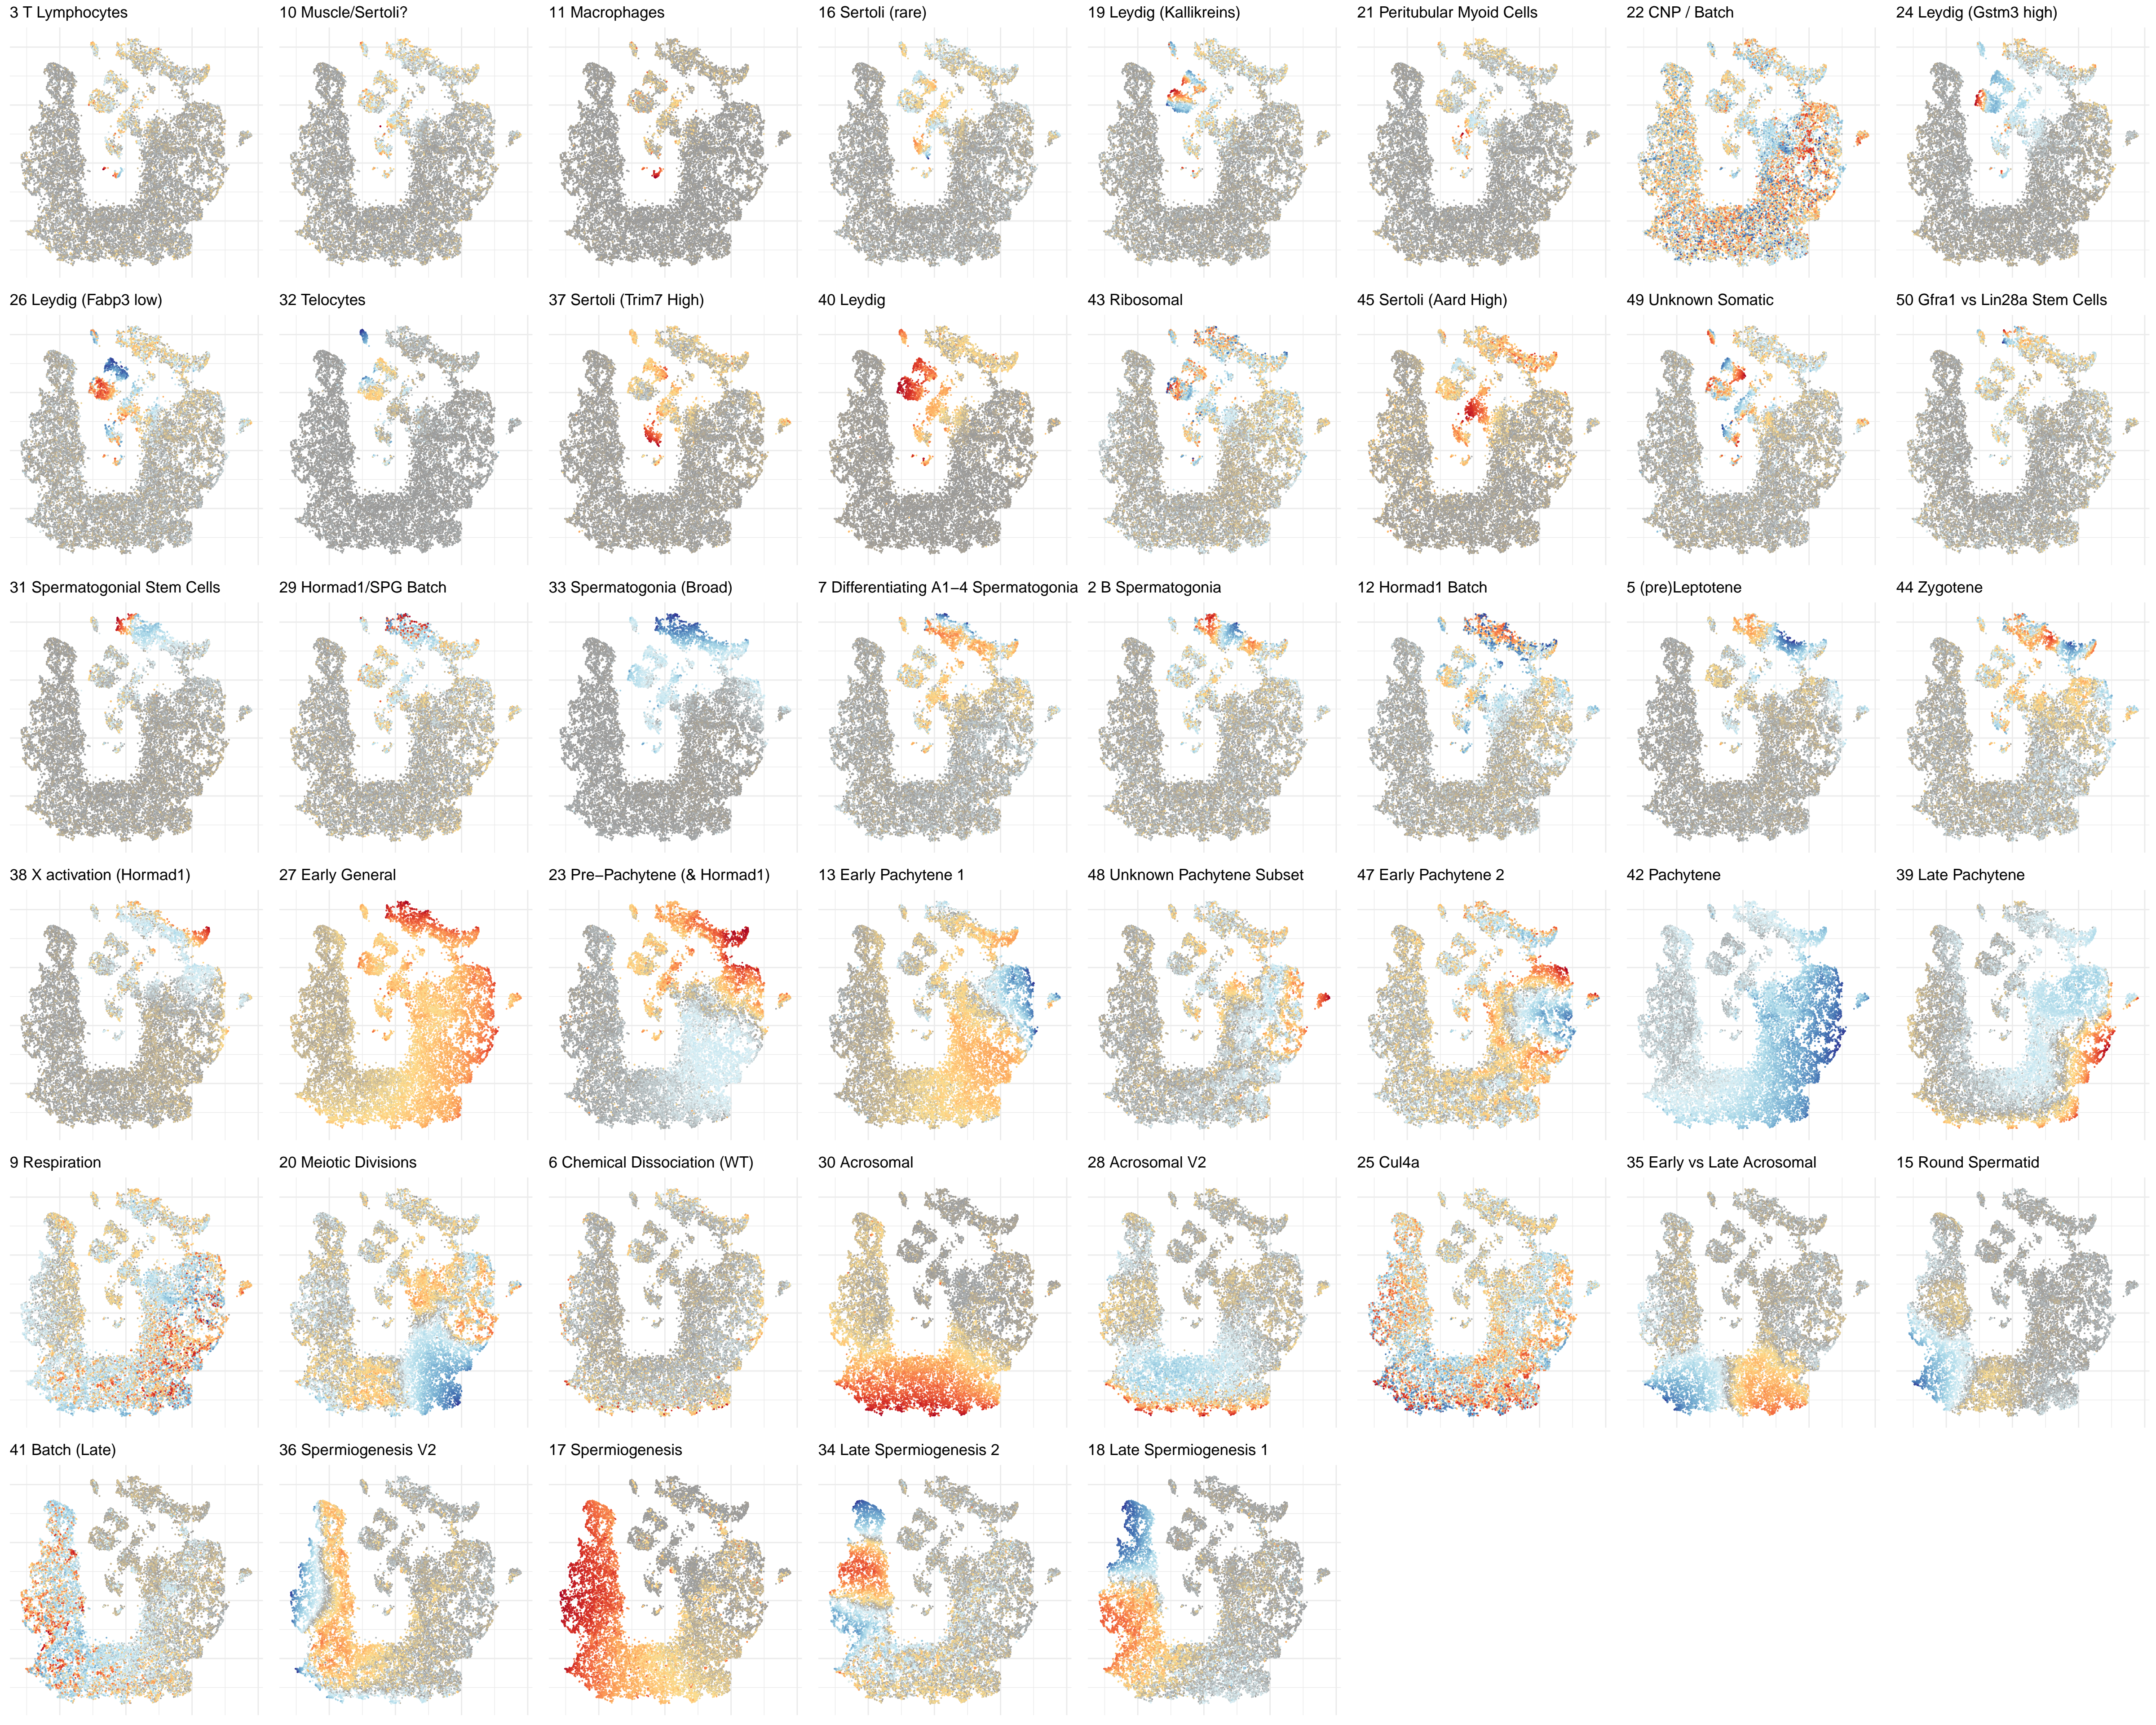

Supplement: supp [file elife_poa_e43966_Figure_3_figure_supplement_1.pdf › elife_poa_e43966_Figure_3_figure_supplement_1.pdf]

Somatic

Diploid

Haploid

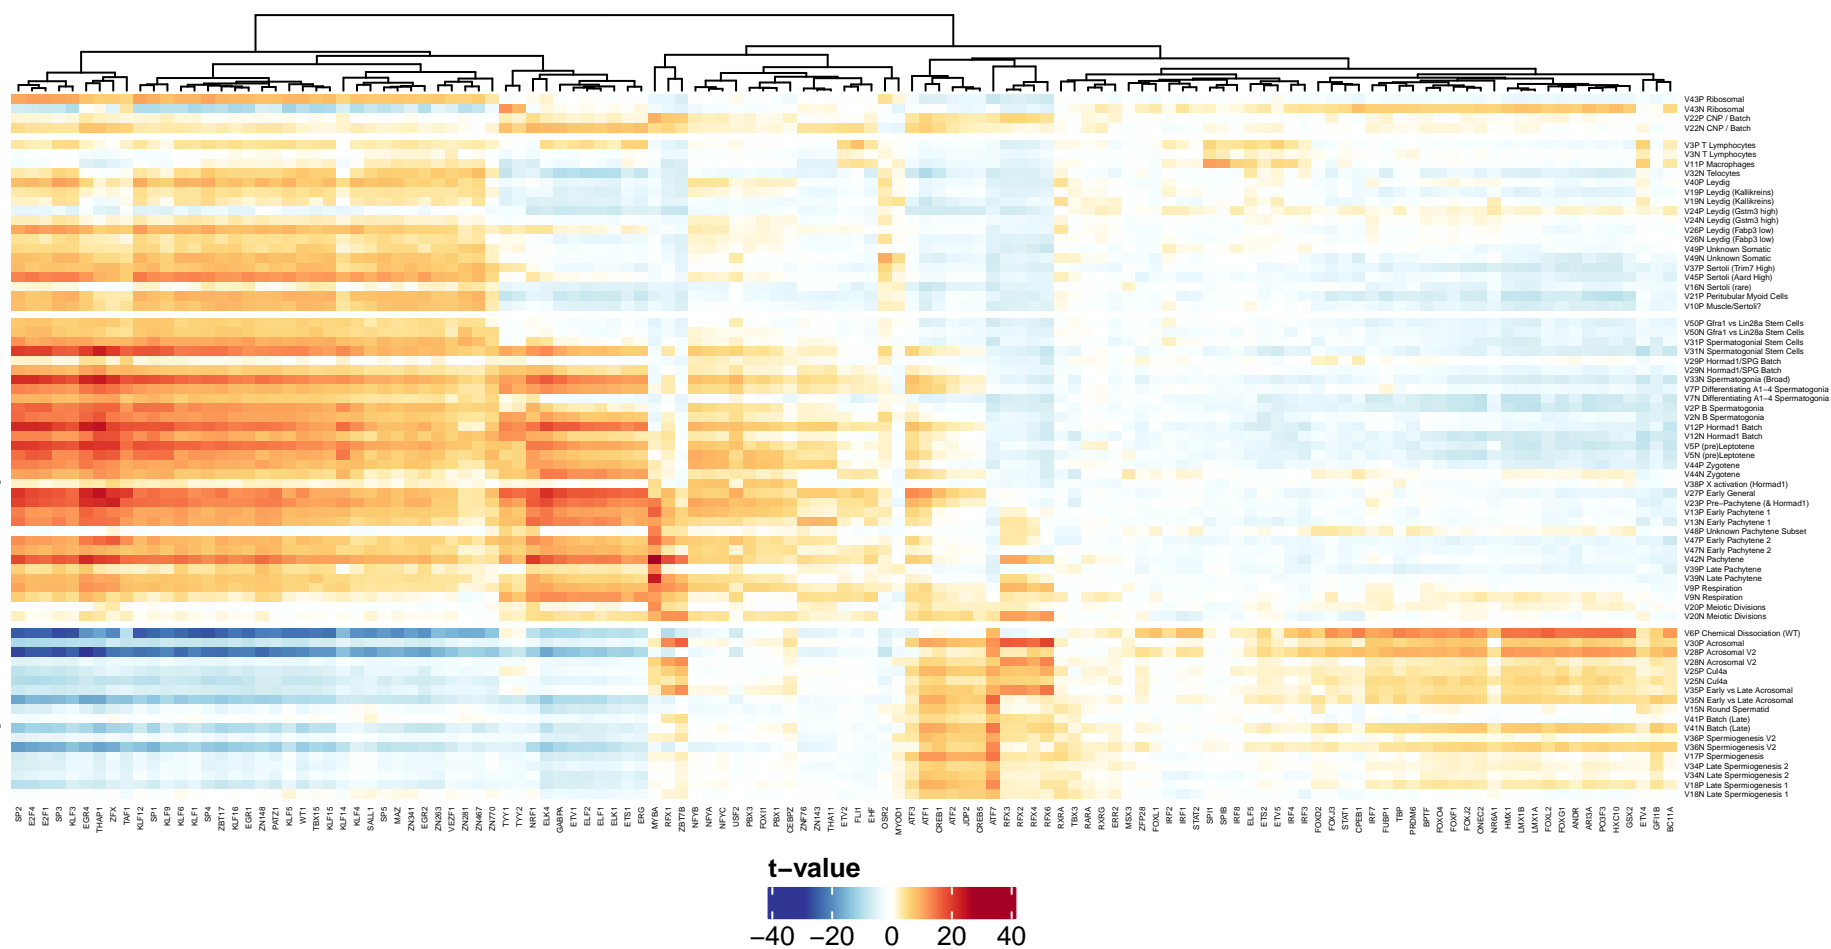

Supplement: supp [file elife_poa_e43966_Figure_7_figure_supplement_1.pdf › elife_poa_e43966_Figure_7_figure_supplement_1.pdf]
